# Supplementary material for: Access to (bridged) bicyclic ureas through azocarboxamide-enabled enantioselective 1,2-diamination of α-branched cyclic ketones
Source: Royal Society of Chemistry journal article supplement (doi:10.1039/d4qo02318h), 2025-01-01
Supplement: d4qo02318h1.pdf [file d4qo02318h1.pdf]

# Supporting Information

## Contents

|                                                     |      |
|-----------------------------------------------------|------|
| 1. General methods.....                             | S2   |
| 2. Representative procedures.....                   | S3   |
| 3. Characterization of products.....                | S9   |
| 4. Determination of the absolute configuration..... | S23  |
| 5. NMR spectra.....                                 | S25  |
| 6. HPLC spectra.....                                | S68  |
| 7. References.....                                  | S110 |

## 1. General methods

Unless otherwise specified, all reactions were conducted under an inert atmosphere and anhydrous conditions. All the solvents were purified according to the standard procedures. All chemicals which are commercially available were employed without further purification. Thin-layer chromatography (TLC) was performed on silica gel plates (60F-254) using UV-light (254 nm). Flash chromatography was conducted on silica gel (200–300 mesh).  $^1\text{H}$  and  $^{13}\text{C}$  NMR spectra were recorded at ambient temperature in  $\text{CDCl}_3$  or DMSO on a 400 MHz NMR spectrometer. Chemical shifts were reported in parts per million (ppm). The data are reported as follows: for  $^1\text{H}$  NMR, chemical shift in ppm from tetramethylsilane with the solvent as internal standard ( $\text{CDCl}_3$   $\delta$  7.26 ppm), (DMSO  $\delta$  2.50 ppm), multiplicity (s = singlet, d = doublet, t = triplet, q = quartet, m = multiplet or overlap of non-equivalent resonances), integration; for  $^{13}\text{C}$  NMR, chemical shift in ppm from tetramethylsilane with the solvent as internal indicator ( $\text{CDCl}_3$   $\delta$  77.1 ppm), (DMSO  $\delta$  39.5 ppm), multiplicity with respect to protons. All high-resolution mass spectra were obtained on a Q-TOF Micro LC/MS System ESI spectrometer to be given in  $m/z$ . Enantiomeric excesses values were determined with HPLC (chiral column; mobile phase *n*-hexane/*i*-PrOH). ACAs **2** are synthesized according to modified literature-reported procedures<sup>[1]</sup>; cyclic ketones are either commercially available or prepared according to the literature<sup>[2]</sup>.

## 2. Representative procedures

### Optimization of the reaction conditions

**Table S1** Effect of catalysts.

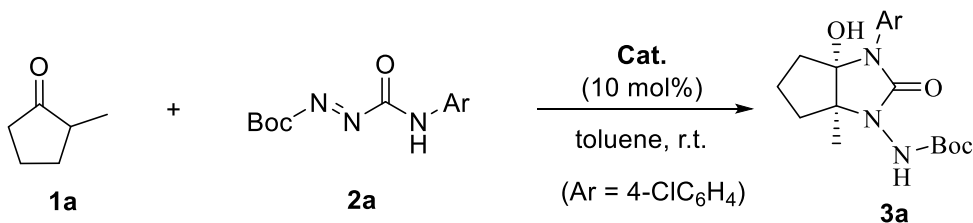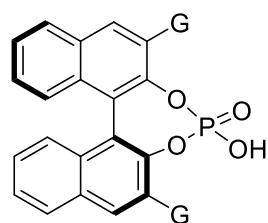

**CPA1**, G = 3,5-(C<sub>6</sub>H<sub>5</sub>)<sub>2</sub>C<sub>6</sub>H<sub>3</sub>  
**CPA2**, G = 2,4,6-(*i*Pr)<sub>3</sub>C<sub>6</sub>H<sub>2</sub>  
**CPA3**, G = 4-ClC<sub>6</sub>H<sub>4</sub>  
**CPA4**, G = 9-anthracenyl  
**CPA5**, G = 1-naphthalenyl  
**CPA6**, G = SiPh<sub>3</sub>

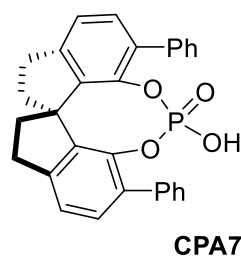

| Entry <sup>a</sup> | Cat.        | Solvent | Yield (%) <sup>b</sup> | dr <sup>c</sup> | ee (%) <sup>d</sup> |
|--------------------|-------------|---------|------------------------|-----------------|---------------------|
| 1                  | <b>CPA1</b> | toluene | 76                     | > 20:1          | 87                  |
| 2                  | <b>CPA2</b> | toluene | 85                     | > 20:1          | 95                  |
| 3                  | <b>CPA3</b> | toluene | 52                     | > 20:1          | 61                  |
| 4                  | <b>CPA4</b> | toluene | 64                     | > 20:1          | 73                  |
| 5                  | <b>CPA5</b> | toluene | 73                     | > 20:1          | 78                  |
| 6                  | <b>CPA6</b> | toluene | n.r.                   | -               | -                   |
| 7                  | <b>CPA7</b> | toluene | n.r.                   | -               | -                   |

<sup>a</sup>Reaction conditions: **1a** (0.1 mmol), **2a** (0.15 mmol), and **Cat.** (10 mol%) in a specified solvent (1 mL) at room temperature (r.t.) for 120 h.

<sup>b</sup>Isolated yields.

<sup>c</sup>dr values were determined by <sup>1</sup>H NMR.

<sup>d</sup>ee values were determined by HPLC analysis on a chiral stationary phase.

**Table S2** Effect of solvents.

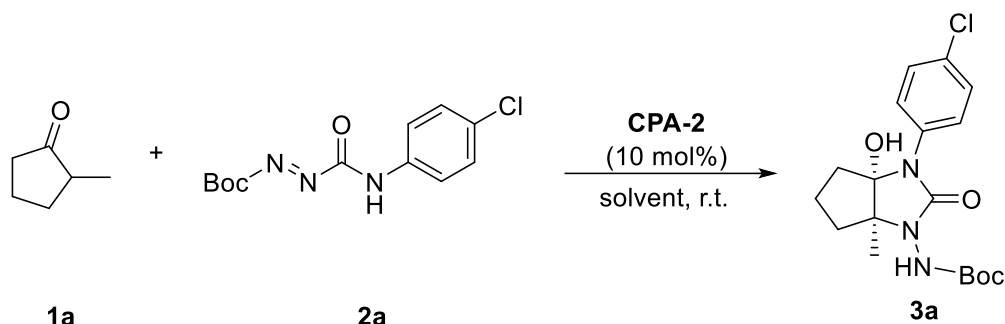

| Entry <sup>a</sup> | Cat. | Solvent                         | Yield (%) <sup>b</sup> | dr <sup>c</sup> | ee (%) <sup>d</sup> |
|--------------------|------|---------------------------------|------------------------|-----------------|---------------------|
| 1                  | CPA2 | toluene                         | 85                     | > 20:1          | 95                  |
| 2                  | CPA2 | CH <sub>2</sub> Cl <sub>2</sub> | 52                     | > 20:1          | 97                  |
| 3                  | CPA2 | CH <sub>3</sub> CN              | n.r.                   | -               | -                   |
| 4                  | CPA2 | THF                             | n.r.                   | -               | -                   |
| 5                  | CPA2 | PhCl                            | 44                     | > 20:1          | 95                  |
| 6                  | CPA2 | PhBr                            | 31                     | > 20:1          | 94                  |

<sup>a</sup>Reaction conditions: **1a** (0.1 mmol), **2a** (0.15 mmol), and **CPA-2** (10 mol%) in solvent specified (1 mL) at r.t. for 120 h.

<sup>b</sup>Isolated yields.

<sup>c</sup>dr values were determined by <sup>1</sup>H NMR.

<sup>d</sup>ee values were determined by HPLC analysis on a chiral stationary phase.

**Table S3** Effect of additives.

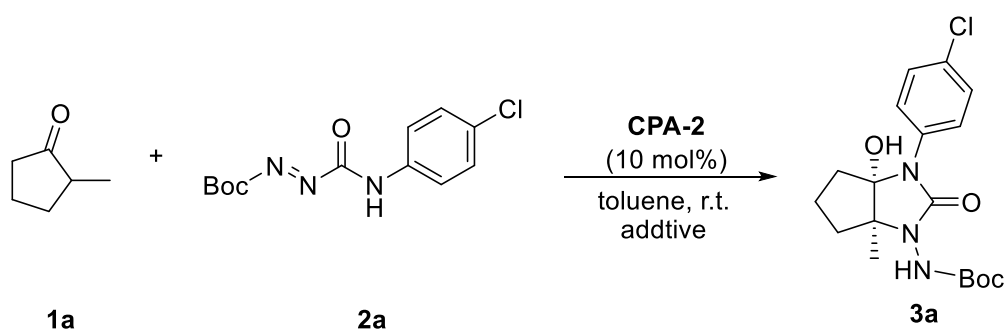

| Entry <sup>a</sup> | Additive | Solvent | Yield (%) <sup>b</sup> | dr <sup>c</sup> | ee (%) <sup>d</sup> |
|--------------------|----------|---------|------------------------|-----------------|---------------------|
| 1                  | 3Å       | toluene | 26                     | > 20:1          | 7                   |
| 2                  | 4Å       | toluene | 32                     | > 20:1          | 3                   |
| 3                  | 5Å       | toluene | 37                     | > 20:1          | 0                   |

<sup>a</sup>Reaction conditions: **1a** (0.1 mmol), **2a** (0.15 mmol), and **CPA-2** (10 mol%) in toluene (1 mL) at specific temperature. for 120 h.

<sup>b</sup>Isolated yields.

<sup>c</sup>dr values were determined by <sup>1</sup>H NMR.

<sup>d</sup>ee values were determined by HPLC analysis on a chiral stationary phase.

## Optimization of the reaction conditions

**Table S4** Effect of catalysts.

| Entry <sup>a</sup> | Cat. | Solvent | Yield (%) <sup>b</sup> | dr <sup>c</sup> | ee (%) <sup>d</sup> |
|--------------------|------|---------|------------------------|-----------------|---------------------|
| 1                  | CPA1 | toluene | 82                     | > 20:1          | 71                  |
| 2                  | CPA2 | toluene | 73                     | > 20:1          | 67                  |
| 3                  | CPA3 | toluene | n.r.                   | -               | -                   |
| 4                  | CPA4 | toluene | 68                     | > 20:1          | 19                  |

<sup>a</sup>Reaction conditions: **1a** (0.1 mmol), **2a** (0.15 mmol), and **Cat.** (10 mol%) in toluene specified (1 mL) at r.t. for 120 h.

<sup>b</sup>Isolated yields.

<sup>c</sup>dr values were determined by <sup>1</sup>H NMR.

<sup>d</sup>ee values were determined by HPLC analysis on a chiral stationary phase.

**Table S5** Effect of solvents.

| Entry <sup>a</sup> | Cat. | Solvent                         | Yield (%) <sup>b</sup> | dr <sup>c</sup> | ee (%) <sup>d</sup> |
|--------------------|------|---------------------------------|------------------------|-----------------|---------------------|
| 1                  | CPA1 | toluene                         | 73                     | > 20:1          | 67                  |
| 2                  | CPA1 | CH <sub>2</sub> Cl <sub>2</sub> | 41                     | > 20:1          | 91                  |
| 3                  | CPA1 | CH <sub>3</sub> CN              | n.r.                   | -               | -                   |
| 4                  | CPA1 | THF                             | n.r.                   | -               | -                   |
| 5                  | CPA1 | PhCl                            | 63                     | > 20:1          | 83                  |
| 6                  | CPA1 | PhBr                            | 67                     | > 20:1          | 80                  |
| 7                  | CPA1 | PhCF <sub>3</sub>               | 76                     | > 20:1          | 90                  |

<sup>a</sup>Reaction conditions: **1a** (0.1 mmol), **2a** (0.15 mmol), and **CPA-1** (10 mol%) in solvent specified (1 mL) at r.t. for 120 h.

<sup>b</sup>Isolated yields.

<sup>c</sup>dr values were determined by <sup>1</sup>H NMR.

<sup>d</sup>ee values were determined by HPLC analysis on a chiral stationary phase.

## Experimental procedures for the transformation of the products

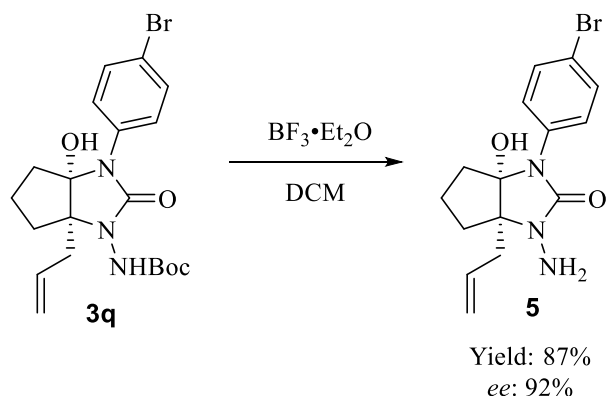

To the solution of compound **3q** (90.2 mg, 0.2 mmol) in CH<sub>2</sub>Cl<sub>2</sub> (2 mL) was added boron trifluoride ether (50 μL, 0.4 mmol), the reaction mixture was stirred at room temperature for 2 h. After the completion of the reaction which was indicated by TLC, the reaction mixture was treated with H<sub>2</sub>O and extracted with dichloromethane and washed with brine. The combined organic layers were dried with anhydrous Na<sub>2</sub>SO<sub>4</sub> and the solvent was removed under reduced pressure. The residue was purified through preparative thin layer chromatography on silica gel (petroleum ether/ethyl acetate = 2:1) to afford pure product **5**.

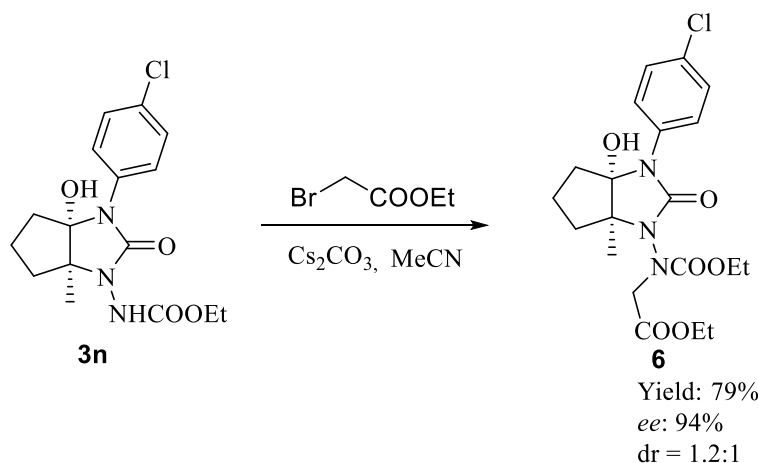

To the solution of compound **3n** (70.6 mg, 0.2 mmol) in CH<sub>3</sub>CN (2 mL) was added ethyl 2-bromoacetate (44 μL, 0.4 mmol). Then, Cs<sub>2</sub>CO<sub>3</sub> (130 mg, 0.4 mmol) was added to the reaction mixture, which was stirred at 50 °C for 2 h. After the completion of the reaction which was indicated by TLC, the reaction mixture was treated with H<sub>2</sub>O and extracted with ethyl acetate and washed with brine. The combined organic layers were dried with anhydrous Na<sub>2</sub>SO<sub>4</sub> and the solvent was removed under reduced pressure.

The residue was purified through preparative thin layer chromatography on silica gel (petroleum ether/ethyl acetate = 3:1) to afford pure product **6**.

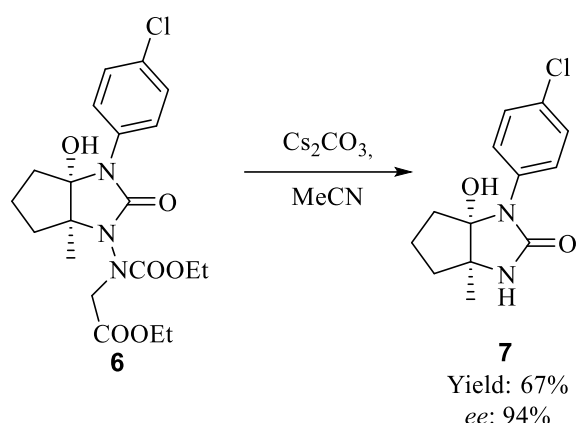

To the solution of compound **6** (82.2mg, 0.2 mmol) in CH<sub>3</sub>CN (2 mL) was added Cs<sub>2</sub>CO<sub>3</sub> (97.6 mg, 0.3 mmol), the reaction mixture was stirred at 80 °C for 6 h. After the completion of the reaction which was indicated by TLC, the reaction mixture was treated with H<sub>2</sub>O and extracted with ethyl acetate and washed with brine. The combined organic layers were dried with anhydrous Na<sub>2</sub>SO<sub>4</sub> and the solvent was removed under reduced pressure. The residue was purified through preparative thin layer chromatography on silica gel (petroleum ether/ethyl acetate = 1:2) to afford pure product **7**.

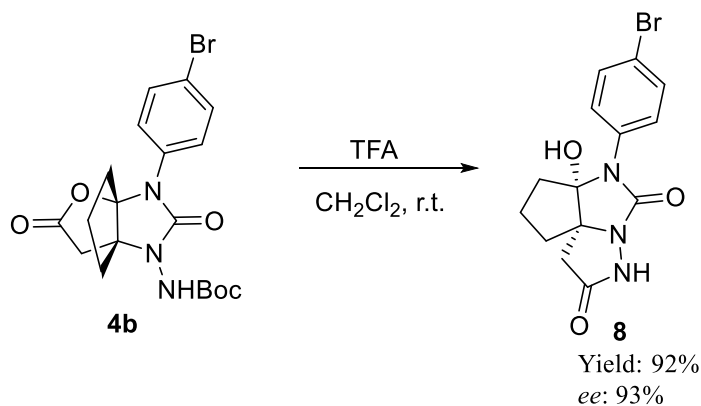

To the solution of compound **4b** (90.2 mg, 0.2 mmol) in DCM (1 mL) was added TFA (77  $\mu$ L, 1 mmol), the reaction mixture was stirred at room temperature for 2 h. After the completion of the reaction which was indicated by TLC, the reaction mixture was treated with saturated NaHCO<sub>3</sub> aqueous solution and extracted with dichloromethane and washed with brine. The combined organic layers were dried with anhydrous Na<sub>2</sub>SO<sub>4</sub> and the solvent was removed under reduced pressure. The residue was purified through preparative thin layer chromatography on silica gel (petroleum ether/ethyl acetate = 4:1) to afford pure product **8**.

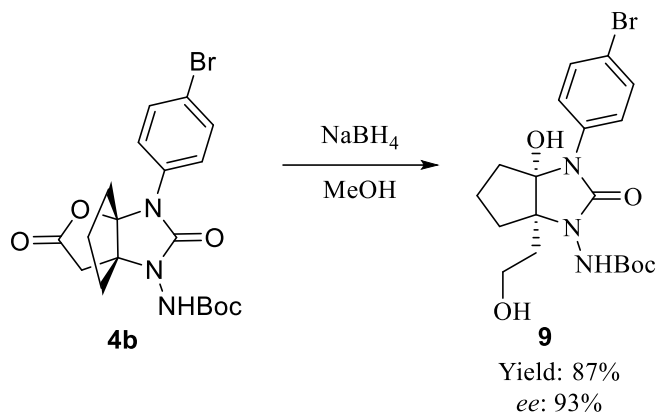

To the solution of compound **4b** (90.2 mg, 0.2 mmol) in MeOH (2 mL) was added sodium borohydride (11.4 mg, 0.3 mmol). The reaction mixture was stirred at room temperature for 5 h. After the completion of the reaction which was indicated by TLC, the reaction mixture was treated with H<sub>2</sub>O and extracted with ethyl acetate and washed with brine. The combined organic layers were dried with anhydrous Na<sub>2</sub>SO<sub>4</sub> and the solvent was removed under reduced pressure. The residue was purified through preparative thin layer chromatography on silica gel (petroleum ether/ethyl acetate = 4:1) to afford pure product **9**.



### 3. Characterization of products

#### **tert-Butyl ((3a*S*,6a*S*)-3-(4-chlorophenyl)-3a-hydroxy-6a-methyl-2-oxohexahydrocyclopenta[*d*]imidazol-1(2*H*)-yl)carbamate (3a):**

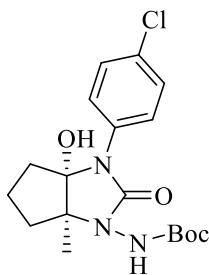

A white solid; 64.8 mg; isolated yield = 85%; m.p. 142.4 – 142.9 °C; dr > 20:1.  $[\alpha]^{21.0}_D = +165.00$  (*c* 0.10, EA); HPLC (IG-3 column, *i*-propanol/*n*-hexane = 10/90, flow rate 1.0 mL/min,  $\lambda = 254$  nm), product:  $t_1 = 5.72$  min (minor),  $t_2 = 6.77$  min (major), *ee* = 95%;  $^1\text{H}$  NMR (400 MHz, DMSO)  $\delta$  9.01 – 8.60 (m, 1H), 7.55 (d, *J* = 8.8 Hz, 2H), 7.41 (d, *J* = 8.8 Hz, 2H), 6.50 (s, 1H), 2.03 – 1.97 (m, 1H), 1.93 – 1.85 (m, 1H), 1.73 – 1.61 (m, 1H), 1.49 – 1.34 (m, 12H), 1.20 (s, 3H).  $^{13}\text{C}$  NMR (100 MHz, DMSO)  $\delta$  155.7, 154.3, 136.4, 129.0, 128.5, 126.4, 96.1, 79.6, 69.1, 37.0, 28.1, 20.8, 19.9. HRMS (ESI) *m/z* calcd for  $\text{C}_{18}\text{H}_{24}\text{ClN}_3\text{O}_4\text{Na}^+$  [*M* + *Na*] $^+ = 404.1347$ , found = 404.1343.

#### **tert-Butyl ((3a*S*,6a*S*)-3a-hydroxy-6a-methyl-2-oxo-3-phenylhexahydrocyclopenta[*d*]imidazol-1(2*H*)-yl)carbamate (3b):**

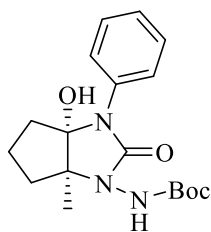

A white solid; 52.1 mg; isolated yield = 75%; m.p. 129.4 – 129.9 °C; dr > 20:1.  $[\alpha]^{21.0}_D = -79.01$  (*c* 0.10, EA); HPLC (IH-3 column, *i*-propanol/*n*-hexane = 10/90, flow rate 1.0 mL/min,  $\lambda = 254$  nm), product:  $t_1 = 6.55$  min (major),  $t_2 = 14.59$  min (minor), *ee* = 92%;  $^1\text{H}$  NMR (400 MHz, DMSO)  $\delta$  8.95 – 8.56 (m, 1H), 7.56 – 7.44 (m, 2H), 7.41 – 7.31 (m, 2H), 7.24 – 7.16 (m, 1H), 6.41 (s, 1H), 2.09 – 1.98 (m, 1H), 1.91 – 1.83 (m, 1H), 1.72 – 1.57 (m, 1H), 1.50 – 1.40 (m, 12H), 1.22 (s, 3H).  $^{13}\text{C}$  NMR (100 MHz, DMSO)  $\delta$  156.2, 155.0, 137.7, 128.9, 126.1, 125.6, 96.4, 79.9, 69.4, 37.4, 37.4, 28.5, 21.2, 20.4. HRMS (ESI) *m/z* calcd for  $\text{C}_{18}\text{H}_{25}\text{N}_3\text{O}_4\text{Na}^+$  [*M* + *Na*] $^+ = 370.1737$ , found = 370.1737.

#### **tert-Butyl ((3a*S*,6a*S*)-3-(4-fluorophenyl)-3a-hydroxy-6a-methyl-2-oxohexahydrocyclopenta[*d*]imidazol-1(2*H*)-yl)carbamate (3c):**

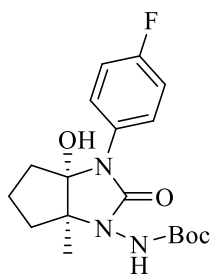

A white solid; 51.8 mg; isolated yield = 71%; m.p. 121.4 – 121.9 °C; dr > 20:1.  $[\alpha]^{21.0}_D = -90.00$  (*c* 0.10, EA); HPLC (IG-3 column, *i*-propanol/*n*-hexane = 10/90, flow rate 1.0 mL/min,  $\lambda = 254$  nm), product:  $t_1 = 5.71$  min (minor),  $t_2 = 6.20$  min (major), *ee* = 94%;  $^1\text{H}$  NMR (400 MHz, DMSO)  $\delta$  9.05 – 8.48 (m, 1H), 7.59 – 7.38 (m, 2H), 7.31 – 7.09 (m, 2H), 6.42 (s, 1H), 2.11 – 1.93 (m, 1H), 1.88 – 1.76 (m, 1H), 1.69 – 1.55 (m, 1H), 1.54 – 1.35 (m, 12H), 1.22 (s, 3H).  $^{13}\text{C}$  NMR (100 MHz, DMSO)  $\delta$  161.4, 159.0 (*J* = 240 Hz), 156.2, 155.1, 133.8, 133.7, 128.5, 128.4, 115.8, 115.5 (*J* = 22 Hz), 96.3, 79.9, 69.5, 37.4, 37.4, 28.5, 21.2, 20.3.  $^{19}\text{F}$  NMR (376 MHz, DMSO)  $\delta$  -117.10. HRMS (ESI) *m/z* calcd for  $\text{C}_{18}\text{H}_{24}\text{FN}_3\text{O}_4\text{Na}^+$  [*M* + *Na*] $^+ = 388.1643$ , found = 388.1641.

#### **tert-Butyl ((3a*S*,6a*S*)-3-(4-bromophenyl)-3a-hydroxy-6a-methyl-2-oxohexahydrocyclopenta[*d*]imidazol-1(2*H*)-yl)carbamate (3d):**

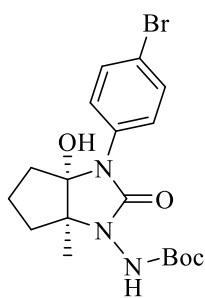

A white solid; 61.2 mg; isolated yield = 72%; m.p. 148.3 – 148.8 °C; dr > 20:1.  $[\alpha]^{21.0}_D = +187.01$  (c 0.10, EA); HPLC (IG-3 column, *i*-propanol/*n*-hexane = 10/90, flow rate 1.0 mL/min,  $\lambda = 254$  nm), product:  $t_1 = 6.16$  min (minor),  $t_2 = 7.77$  min (major),  $ee = 93\%$ ;  $^1\text{H}$  NMR (400 MHz, DMSO)  $\delta$  9.03 – 8.57 (m, 1H), 7.54 (d,  $J = 9.0$  Hz, 2H), 7.50 (d,  $J = 9.0$  Hz, 2H), 6.51 (s, 1H), 2.06 – 1.97 (m, 1H), 1.95 – 1.85 (m, 1H), 1.75 – 1.60 (m, 1H), 1.52 – 1.37 (m, 12H), 1.20 (s, 3H).  $^{13}\text{C}$  NMR (100 MHz, DMSO)  $\delta$  156.1, 154.6, 137.2, 131.8, 127.0, 117.5, 96.5, 80.0, 69.5, 37.4, 37.6, 28.5, 21.2, 20.3. HRMS (ESI)  $m/z$  calcd for  $\text{C}_{18}\text{H}_{24}\text{BrN}_3\text{O}_4\text{Na}^+$   $[M + \text{Na}]^+ = 448.0842$ , found = 448.0841.

**tert-Butyl ((3aS,6aS)-3a-hydroxy-3-(4-iodophenyl)-6a-methyl-2-oxohexahydrocyclopenta[d]imidazol-1(2H)-yl)carbamate (3e):**

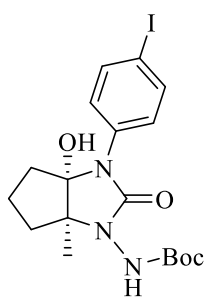

A white solid; 73.8 mg; isolated yield = 78%; m.p. 135.3 – 135.8 °C; dr > 20:1.  $[\alpha]^{21.0}_D = +260.01$  (c 0.10, EA); HPLC (IG-3 column, *i*-propanol/*n*-hexane = 10/90, flow rate 1.0 mL/min,  $\lambda = 254$  nm), product:  $t_1 = 6.87$  min (minor),  $t_2 = 9.26$  min (major),  $ee = 95\%$ ;  $^1\text{H}$  NMR (400 MHz, DMSO)  $\delta$  9.01 – 8.61 (m, 1H), 7.70 (d,  $J = 8.6$  Hz, 2H), 7.38 (d,  $J = 8.6$  Hz, 2H), 6.50 (s, 1H), 2.15 – 1.82 (m, 2H), 1.76 – 1.62 (m, 1H), 1.49 – 1.29 (m, 12H), 1.21 (s, 3H).  $^{13}\text{C}$  NMR (100 MHz, DMSO)  $\delta$  156.1, 154.6, 137.8, 137.6, 127.2, 96.4, 89.8, 80.0, 69.5, 37.4, 37.4, 28.5, 21.2, 20.3. HRMS (ESI)  $m/z$  calcd for  $\text{C}_{18}\text{H}_{24}\text{IN}_3\text{O}_4\text{Na}^+$   $[M + \text{Na}]^+ = 496.0703$ , found = 496.0704.

**tert-Butyl ((3aS,6aS)-3a-hydroxy-6a-methyl-2-oxo-3-(*p*-tolyl)hexahydrocyclopenta[d]imidazol-1(2H)-yl)carbamate (3f):**

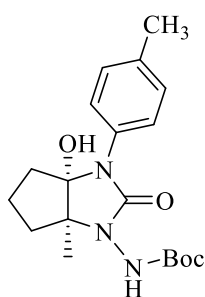

A white solid; 55.6 mg; isolated yield = 77%; m.p. 131.1 – 131.6 °C; dr > 20:1.  $[\alpha]^{21.0}_D = -51.01$  (c 0.10, EA); HPLC (IG-3 column, *i*-propanol/*n*-hexane = 10/90, flow rate 1.0 mL/min,  $\lambda = 254$  nm), product:  $t_1 = 7.68$  min (major),  $t_2 = 9.16$  min (minor),  $ee = 94\%$ ;  $^1\text{H}$  NMR (400 MHz, DMSO)  $\delta$  8.96 – 8.51 (m, 1H), 7.32 (d,  $J = 8.2$  Hz, 2H), 7.15 (d,  $J = 8.2$  Hz, 2H), 6.31 (s, 1H), 2.28 (s, 3H), 2.08 – 1.99 (m, 1H), 1.85 – 1.77 (m, 1H), 1.68 – 1.53 (m, 1H), 1.48 – 1.33 (m, 12H), 1.20 (s, 3H).  $^{13}\text{C}$  NMR (100 MHz, DMSO)  $\delta$  156.2, 155.2, 135.0, 134.9, 129.4, 126.5, 96.3, 79.8, 69.3, 37.5, 37.4, 28.5, 21.2, 21.0, 20.4. HRMS (ESI)  $m/z$  calcd for  $\text{C}_{19}\text{H}_{27}\text{N}_3\text{O}_4\text{Na}^+$   $[M + \text{Na}]^+ = 384.1894$ , found = 384.1890.

**tert-Butyl ((3aS,6aS)-3a-hydroxy-3-(4-methoxyphenyl)-6a-methyl-2-oxohexahydrocyclopenta[d]imidazol-1(2H)-yl)carbamate (3g):**

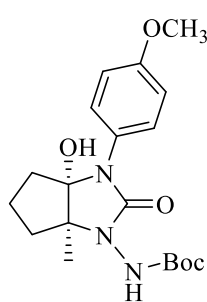

A colorless oil; 57.3 mg; isolated yield = 76%; dr > 20:1.  $[\alpha]^{21.0}_D = +129.01$  (c 0.10, EA); HPLC (IG-3 column, *i*-propanol/*n*-hexane = 10/90, flow rate 1.0 mL/min,  $\lambda = 254$  nm), product:  $t_1 = 12.95$  min (minor),  $t_2 = 13.78$  min (major),  $ee = 94\%$ ;  $^1\text{H NMR}$  (400 MHz, DMSO)  $\delta$  9.06 – 8.46 (m, 1H), 7.27 (d,  $J = 8.8$  Hz, 2H), 6.93 (d,  $J = 8.8$  Hz, 2H), 6.25 (s, 1H), 3.75 (s, 3H), 2.07 – 1.97 (m, 1H), 1.82 – 1.73 (m, 1H), 1.62 – 1.50 (m, 1H), 1.49 – 1.33 (m, 12H), 1.20 (s, 3H).  $^{13}\text{C NMR}$  (100 MHz, DMSO)  $\delta$  157.8, 156.3, 155.4, 129.9, 129.0, 114.2, 96.2, 80.0, 69.3, 55.7, 40.5, 40.3, 40.1, 39.9, 39.7, 39.5, 39.2, 37.5, 37.3, 28.5, 21.2, 20.4. HRMS (ESI)  $m/z$  calcd for  $\text{C}_{19}\text{H}_{27}\text{N}_3\text{O}_5\text{Na}^+ [\text{M} + \text{Na}]^+ = 400.1843$ , found = 400.1838.

***tert*-Butyl ((3*aS*,6*aS*)-3-((1,1'-biphenyl)-4-yl)-3*a*-hydroxy-6*a*-methyl-2-oxohexahydrocyclopenta[*d*]imidazol-1(2*H*)-yl)carbamate (3h):**

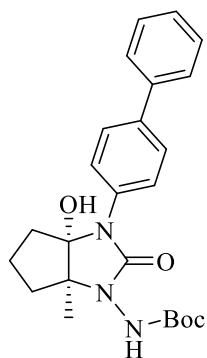

A white solid; 55.0 mg; isolated yield = 65%; m.p. 134.6 – 135.2 °C; dr > 20:1.  $[\alpha]^{21.0}_D = -49.00$  (c 0.10, EA); HPLC (IG-3 column, *i*-propanol/*n*-hexane = 10/90, flow rate 1.0 mL/min,  $\lambda = 254$  nm), product:  $t_1 = 6.63$  min (major),  $t_2 = 9.10$  min (minor),  $ee = 93\%$ ;  $^1\text{H NMR}$  (400 MHz, DMSO)  $\delta$  9.27 – 8.50 (m, 1H), 7.74 – 7.65 (m, 4H), 7.63 – 7.58 (m, 2H), 7.52 – 7.43 (m, 2H), 7.39 – 7.33 (m, 1H), 6.50 (s, 1H), 2.19 – 1.83 (m, 2H), 1.78 – 1.59 (m, 1H), 1.56 – 1.35 (m, 12H), 1.23 (s, 3H).  $^{13}\text{C NMR}$  (100 MHz, DMSO)  $\delta$  156.2, 154.9, 140.1, 137.2, 137.1, 129.4, 127.7, 127.1, 126.9, 126.0, 96.5, 80.0, 69.5, 37.5, 37.4, 28.5, 21.3, 20.4. HRMS (ESI)  $m/z$  calcd for  $\text{C}_{24}\text{H}_{29}\text{N}_3\text{O}_4\text{Na}^+ [\text{M} + \text{Na}]^+ = 446.2050$ , found = 446.2046.

***tert*-Butyl ((3*aS*,6*aS*)-3-(2-chlorophenyl)-3*a*-hydroxy-6*a*-methyl-2-oxohexahydrocyclopenta[*d*]imidazol-1(2*H*)-yl)carbamate (3i):**

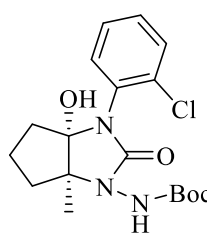

A white solid; 55.6 mg; isolated yield = 73%; m.p. 135.4 – 135.9 °C; dr > 20:1.  $[\alpha]^{21.0}_D = +144.01$  (c 0.10, EA); HPLC (IG-3 column, *i*-propanol/*n*-hexane = 30/70, flow rate 1.0 mL/min,  $\lambda = 254$  nm), product:  $t_1 = 7.38$  min (minor),  $t_2 = 10.60$  min (major),  $ee = 98\%$ ;  $^1\text{H NMR}$  (400 MHz, DMSO)  $\delta$  9.00 – 8.51 (m, 1H), 7.61 – 7.52 (m, 2H), 7.45 – 7.26 (m, 2H), 6.29 (s, 1H), 2.09 – 2.02 (m, 1H), 1.97 – 1.79 (m, 1H), 1.78 – 1.70 (m, 1H), 1.64 – 1.52 (m, 2H), 1.49 – 1.34 (m, 10H), 1.24 (s, 3H).  $^{13}\text{C NMR}$  (100 MHz, DMSO)  $\delta$  156.1, 154.2, 134.7, 134.0, 133.7, 130.3, 129.7, 127.7, 96.6, 79.7, 70.6, 38.3, 38.0, 28.5, 21.7, 20.0. HRMS (ESI)  $m/z$  calcd for  $\text{C}_{18}\text{H}_{24}\text{ClN}_3\text{O}_4\text{Na}^+ [\text{M} + \text{Na}]^+ = 404.1348$ , found = 404.1349.

***tert*-Butyl ((3*aS*,6*aS*)-3-(3-chlorophenyl)-3*a*-hydroxy-6*a*-methyl-2-oxohexahydrocyclopenta[*d*]imidazol-1(2*H*)-yl)carbamate (3j):**

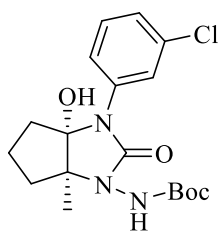

A white solid; 61.7 mg; isolated yield = 81%; m.p. 145.1 – 145.6 °C; dr > 20:1.  $[\alpha]^{21.0}_{\text{D}} = -79.00$  (*c* 0.10, EA); HPLC (IG-3 column, *i*-propanol/*n*-hexane = 10/90, flow rate 1.0 mL/min,  $\lambda = 250$  nm), product:  $t_1 = 8.77$  min (minor),  $t_2 = 9.27$  min (major), *ee* = 91%;  $^1\text{H}$  NMR (400 MHz, DMSO)  $\delta$  9.07 – 8.64 (m, 1H), 7.66 (s, 1H), 7.54 (d, *J* = 8.1 Hz, 1H), 7.38 (t, *J* = 8.1 Hz, 1H), 7.22 (d, *J* = 7.9 Hz, 1H), 6.57 (s, 1H), 2.04 – 1.90 (m, 2H), 1.77 – 1.65 (m, 1H), 1.53 – 1.34 (m, 12H), 1.21 (s, 3H).  $^{13}\text{C}$  NMR (100 MHz, DMSO)  $\delta$  156.1, 154.5, 139.4, 133.1, 130.5, 124.7, 124.1, 123.0, 96.6, 80.0, 69.6, 37.4, 37.3, 28.5, 21.3, 20.2. HRMS (ESI) *m/z* calcd for  $\text{C}_{18}\text{H}_{24}\text{ClN}_3\text{O}_4\text{Na}^+$  [*M* + Na] $^+ = 404.1348$ , found = 404.1346.

**tert-Butyl ((3aS,6aS)-3-(3,5-dimethoxyphenyl)-3a-hydroxy-6a-methyl-2-oxohexahydrocyclopenta[d]imidazol-1(2H)-yl)carbamate (3k):**

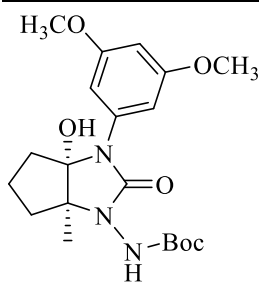

A colorless oil; 70.8 mg; isolated yield = 87%; dr > 20:1.  $[\alpha]^{21.0}_{\text{D}} = +123.01$  (*c* 0.10, EA); HPLC (IG-3 column, *i*-propanol/*n*-hexane = 10/90, flow rate 1.0 mL/min,  $\lambda = 254$  nm), product:  $t_1 = 7.68$  min (minor),  $t_2 = 10.35$  min (major), *ee* = 98%;  $^1\text{H}$  NMR (400 MHz, DMSO)  $\delta$  9.02 – 8.60 (m, 1H), 7.06 – 6.87 (m, 2H), 6.61 (s, 1H), 3.79 (s, 6H), 2.11 – 1.93 (m, 2H), 1.86 – 1.63 (m, 1H), 1.57 – 1.37 (m, 12H), 1.21 (s, 3H).  $^{13}\text{C}$  NMR (100 MHz, DMSO)  $\delta$  156.5, 156.2, 154.7, 138.7, 102.2, 96.7, 96.1, 80.0, 69.6, 56.7, 37.6, 37.5, 28.5, 21.4, 20.2. HRMS (ESI) *m/z* calcd for  $\text{C}_{20}\text{H}_{29}\text{N}_3\text{O}_6\text{Na}^+$  [*M* + Na] $^+ = 430.1949$ , found = 430.1955.

**tert-Butyl ((3aS,6aS)-3a-hydroxy-6a-methyl-3-(naphthalen-2-yl)-2-oxohexahydrocyclopenta[d]imidazol-1(2H)-yl)carbamate (3l):**

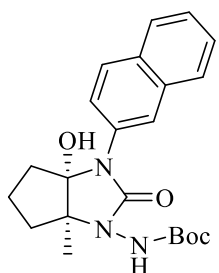

A white solid; 50.0 mg; isolated yield = 63%; m.p. 133.3 – 133.8 °C; dr > 20:1.  $[\alpha]^{21.0}_{\text{D}} = -84.00$  (*c* 0.10, EA); HPLC (IG-3 column, *i*-propanol/*n*-hexane = 10/90, flow rate 1.0 mL/min,  $\lambda = 254$  nm), product:  $t_1 = 5.36$  min (major),  $t_2 = 6.25$  min (minor), *ee* = 91%;  $^1\text{H}$  NMR (400 MHz, DMSO)  $\delta$  9.03 – 8.57 (m, 1H), 8.00 (s, 1H), 7.95 – 7.83 (m, 3H), 7.78 – 7.63 (m, 1H), 7.57 – 7.37 (m, 2H), 6.55 (s, 1H), 2.12 – 2.03 (m, 1H), 1.98 – 1.89 (m, 1H), 1.80 – 1.58 (m, 1H), 1.56 – 1.36 (m, 12H), 1.26 (s, 3H).  $^{13}\text{C}$  NMR (100 MHz, DMSO)  $\delta$  156.2, 155.1, 135.5, 133.5, 131.1, 128.3, 128.0, 127.9, 126.7, 125.9, 125.3, 123.1, 96.6, 79.9, 69.6, 37.6, 37.5, 28.5, 21.3, 20.4. HRMS (ESI) *m/z* calcd for  $\text{C}_{22}\text{H}_{27}\text{N}_3\text{O}_4\text{Na}^+$  [*M* + Na] $^+ = 420.1894$ , found = 420.1896.

**Methyl ((3aS,6aS)-3-(4-chlorophenyl)-3a-hydroxy-6a-methyl-2-oxohexahydrocyclopenta[d]imidazol-1(2H)-yl)carbamate (3m):**

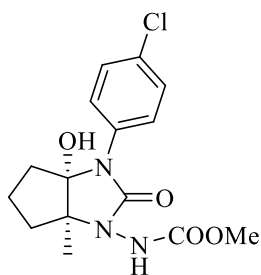

A white solid; 44.1 mg; isolated yield = 65%; m.p. 140.3 – 140.8 °C; dr > 20:1.  $[\alpha]^{21.0}_D = +91.00$  (*c* 0.10, EA); HPLC (IG-3 column, *i*-propanol/*n*-hexane = 10/90, flow rate 1.0 mL/min,  $\lambda = 250$  nm), product:  $t_1 = 11.94$  min (minor),  $t_2 = 15.07$  min (major), *ee* = 92%;  $^1\text{H NMR}$  (400 MHz, DMSO)  $\delta$  9.31 (s, 1H), 7.59 – 7.51 (m, 2H), 7.49 – 7.39 (m, 2H), 6.56 (s, 1H), 3.64 (s, 3H), 2.09 – 1.82 (m, 2H), 1.77 – 1.62 (m, 1H), 1.57 – 1.36 (m, 3H), 1.24 (s, 3H).  $^{13}\text{C NMR}$  (100 MHz, DMSO)  $\delta$  157.7, 154.7, 136.6, 129.6, 128.9, 126.9, 96.5, 69.6, 52.6, 37.4, 37.2, 21.2, 20.3. HRMS (ESI) *m/z* calcd for  $\text{C}_{15}\text{H}_{18}\text{ClN}_3\text{O}_4\text{Na}^+$   $[\text{M} + \text{Na}]^+ = 362.0878$ , found = 362.0873.

**Ethyl ((3aS,6aS)-3-(4-chlorophenyl)-3a-hydroxy-6a-methyl-2-oxohexahydrocyclopenta[d]imidazol-1(2H)-yl)carbamate (3n):**

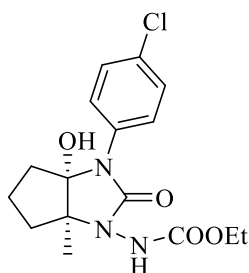

A white solid; 47.3 mg; isolated yield = 67%; m.p. 139.4 – 139.9 °C; dr > 20:1.  $[\alpha]^{21.0}_D = +115.01$  (*c* 0.10, EA); HPLC (IG-3 column, *i*-propanol/*n*-hexane = 10/90, flow rate 1.0 mL/min,  $\lambda = 254$  nm), product:  $t_1 = 10.03$  min (minor),  $t_2 = 12.36$  min (major), *ee* = 94%;  $^1\text{H NMR}$  (400 MHz, DMSO)  $\delta$  9.35 – 8.88 (m, 1H), 7.55 (d, *J* = 8.8 Hz, 2H), 7.43 (d, *J* = 8.8 Hz, 2H), 6.55 (s, 1H), 4.08 (q, *J* = 7.0 Hz, 2H), 2.06 – 1.96 (m, 1H), 1.93 – 1.84 (m, 1H), 1.74 – 1.62 (m, 1H), 1.55 – 1.35 (m, 3H), 1.24 – 1.21 (m, 6H).  $^{13}\text{C NMR}$  (100 MHz, DMSO)  $\delta$  157.2, 154.7, 136.6, 129.5, 128.9, 126.9, 96.5, 69.6, 61.3, 37.4, 37.2, 21.2, 20.3, 14.9. HRMS (ESI) *m/z* calcd for  $\text{C}_{16}\text{H}_{20}\text{ClN}_3\text{O}_4\text{Na}^+$   $[\text{M} + \text{Na}]^+ = 376.1035$ , found = 376.1037.

**Benzyl ((3aS,6aS)-3-(4-chlorophenyl)-3a-hydroxy-6a-methyl-2-oxohexahydrocyclopenta[d]imidazol-1(2H)-yl)carbamate (3o):**

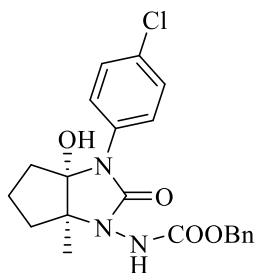

A white solid; 58.9 mg; isolated yield = 71%; m.p. 130.4 – 130.9 °C; dr > 20:1.  $[\alpha]^{21.0}_D = -42.00$  (*c* 0.10, EA); HPLC (IG-3 column, *i*-propanol/*n*-hexane = 10/90, flow rate 1.0 mL/min,  $\lambda = 254$  nm), product:  $t_1 = 14.78$  min (major),  $t_2 = 18.95$  min (minor), *ee* = 93%;  $^1\text{H NMR}$  (400 MHz, DMSO)  $\delta$  9.54 – 9.07 (m, 1H), 7.60 – 7.48 (m, 2H), 7.46 – 7.26 (m, 7H), 6.57 (s, 1H), 5.22 – 5.03 (m, 2H), 2.09 – 1.97 (m, 1H), 1.95 – 1.85 (m, 1H), 1.77 – 1.58 (m, 1H), 1.55 – 1.35 (m, 2H), 1.32 – 1.17 (m, 4H).  $^{13}\text{C NMR}$  (100 MHz, DMSO)  $\delta$  157.2, 154.7, 139.2, 136.9, 136.6, 129.6, 128.9, 128.5, 128.3, 127.0, 96.6, 69.6, 66.6, 37.4, 37.2, 21.2, 20.3. HRMS (ESI) *m/z* calcd for  $\text{C}_{21}\text{H}_{22}\text{ClN}_3\text{O}_4\text{Na}^+$   $[\text{M} + \text{Na}]^+ = 438.1191$ , found = 438.1187.

***tert*-Butyl ((3aS,6aS)-3-(4-bromophenyl)-6a-ethyl-3a-hydroxy-2-oxohexahydrocyclopenta[d]imidazol-1(2H)-yl)carbamate (3p):**

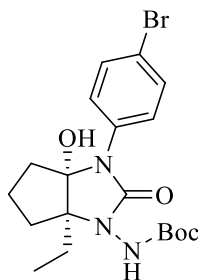

A white solid; 71.1 mg; isolated yield = 81%; m.p. 132.1 – 132.7 °C; dr > 20:1.  $[\alpha]^{21.0}_D = +87.00$  (c 0.10, EA); HPLC (IG-3 column, *i*-propanol/*n*-hexane = 10/90, flow rate 1.0 mL/min,  $\lambda = 254$  nm), product:  $t_1 = 5.89$  min (minor),  $t_2 = 8.91$  min (major), *ee* = 94%;  $^1\text{H}$  NMR (400 MHz, DMSO)  $\delta$  9.07 – 8.46 (m, 1H), 7.54 (d,  $J = 8.7$  Hz, 2H), 7.46 (d,  $J = 8.8$  Hz, 2H), 6.51 (s, 1H), 1.97 – 1.84 (m, 2H), 1.76 – 1.45 (m, 6H), 1.41 (s, 9H), 0.95 (t,  $J = 7.2$  Hz, 3H).  $^{13}\text{C}$  NMR (100 MHz, DMSO)  $\delta$  156.3, 155.0, 137.0, 131.8, 127.6, 117.8, 97.0, 80.0, 71.5, 37.9, 33.6, 28.5, 26.9, 21.2, 9.2. HRMS (ESI)  $m/z$  calcd for  $\text{C}_{19}\text{H}_{26}\text{BrN}_3\text{O}_4\text{Na}^+$  [ $\text{M} + \text{Na}$ ] $^+ = 462.0999$ , found = 462.0996.

**tert-Butyl ((3aS,6aR)-6a-allyl-3-(4-bromophenyl)-3a-hydroxy-2-oxohexahydrocyclopenta[d]imidazol-1(2H)-yl)carbamate (3q):**

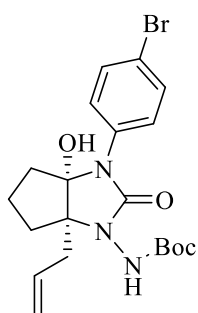

A white solid; 70.3 mg; isolated yield = 78%; m.p. 131.6 – 132.4 °C; dr > 20:1.  $[\alpha]^{21.0}_D = +76.00$  (c 0.10, EA); HPLC (IG-3 column, *i*-propanol/*n*-hexane = 10/90, flow rate 1.0 mL/min,  $\lambda = 254$  nm), product:  $t_1 = 5.35$  min (minor),  $t_2 = 7.80$  min (major), *ee* = 95%;  $^1\text{H}$  NMR (400 MHz, DMSO)  $\delta$  9.10 – 8.25 (m, 1H), 7.56 (d,  $J = 8.8$  Hz, 2H), 7.48 (d,  $J = 8.9$  Hz, 2H), 6.69 (s, 1H), 6.05 – 5.84 (m, 1H), 5.25 – 4.96 (m, 2H), 2.48 – 2.32 (m, 2H), 1.94 – 1.82 (m, 2H), 1.72 – 1.53 (m, 2H), 1.52 – 1.32 (m, 11H).  $^{13}\text{C}$  NMR (100 MHz, DMSO)  $\delta$  156.0, 154.8, 136.9, 135.3, 131.8, 127.4, 118.5, 117.9, 96.9, 80.0, 81.0, 37.5, 33.4, 33.0, 28.5, 21.2. HRMS (ESI)  $m/z$  calcd for  $\text{C}_{20}\text{H}_{26}\text{BrN}_3\text{O}_4\text{Na}^+$  [ $\text{M} + \text{Na}$ ] $^+ = 474.0999$ , found = 474.1009.

**tert-Butyl ((3aS,6aR)-6a-benzyl-3-(4-bromophenyl)-3a-hydroxy-2-oxohexahydrocyclopenta[d]imidazol-1(2H)-yl)carbamate (3r):**

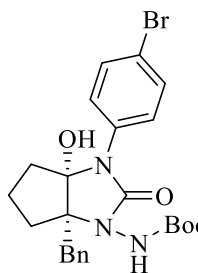

A white solid; 77.2 mg; isolated yield = 77%; m.p. 132.8 – 133.4 °C; dr > 20:1.  $[\alpha]^{21.0}_D = +184.01$  (c 0.10, EA); HPLC (IG-3 column, *i*-propanol/*n*-hexane = 10/90, flow rate 1.0 mL/min,  $\lambda = 254$  nm), product:  $t_1 = 5.09$  min (minor),  $t_2 = 7.69$  min (major), *ee* = 94%;  $^1\text{H}$  NMR (400 MHz, DMSO)  $\delta$  8.94 – 8.57 (m, 1H), 7.60 – 7.54 (m, 2H), 7.53 – 7.48 (m, 2H), 7.42 – 7.35 (m, 2H), 7.32 – 7.22 (m, 2H), 7.21 – 7.15 (m, 1H), 7.05 (s, 1H), 3.31 – 3.14 (m, 1H), 2.96 – 2.78 (m, 1H), 1.89 – 1.69 (m, 2H), 1.65 – 1.51 (m, 1H), 1.44 – 1.28 (m, 12H).  $^{13}\text{C}$  NMR (101 MHz, DMSO)  $\delta$  156.3, 154.9, 138.1, 136.8, 131.8, 131.7, 128.3, 127.6, 126.6, 118.0, 97.2, 80.0, 72.5, 72.2, 39.2, 37.3, 32.6, 28.5, 21.1. HRMS (ESI)  $m/z$  calcd for  $\text{C}_{24}\text{H}_{28}\text{BrN}_3\text{O}_4\text{Na}^+$  [ $\text{M} + \text{Na}$ ] $^+ = 524.1155$ , found = 524.1152.

**tert-Butyl ((3aS,6aR)-6a-heptyl-3-(4-bromophenyl)-3a-hydroxy-2-oxohexahydrocyclopenta[d]imidazol-1(2H)-yl)carbamate (3s):**

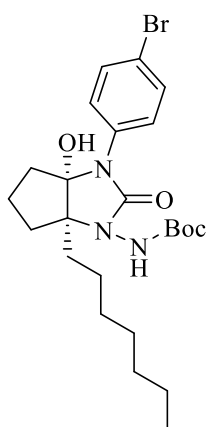

A white solid; 84.5 mg; isolated yield = 83%; m.p. 136.2 – 136.8 °C; dr > 20:1.  $[\alpha]^{21.0}_D = +206.01$  (*c* 0.10, EA); HPLC (IG-3 column, *i*-propanol/*n*-hexane = 10/90, flow rate 1.0 mL/min,  $\lambda = 254$  nm), product:  $t_1 = 4.44$  min (minor),  $t_2 = 6.89$  min (major), *ee* = 96%;  $^1\text{H}$  NMR (400 MHz, DMSO)  $\delta$  8.94 – 8.49 (m, 1H), 7.58 – 7.51 (m, 2H), 7.49 – 7.45 (m, 2H), 6.49 (s, 1H), 2.00 – 1.83 (m, 2H), 1.74 – 1.52 (m, 4H), 1.48 – 1.40 (m, 12H), 1.25 (s, 9H), 0.85 (t, *J* = 6.5 Hz, 3H).  $^{13}\text{C}$  NMR (100 MHz, DMSO)  $\delta$  156.2, 155.0, 137.1, 131.7, 127.5, 117.8, 97.0, 79.8, 71.3, 37.8, 34.6, 34.0, 31.8, 30.6, 29.1, 28.5, 24.0, 22.6, 21.2, 14.4. HRMS (ESI) *m/z* calcd for  $\text{C}_{24}\text{H}_{36}\text{BrN}_3\text{O}_4\text{Na}^+$  [*M* + Na] $^+ = 532.1781$ , found = 532.1788.

**tert-Butyl ((3aS,6aR)-3-(4-bromophenyl)-6a-cyclopentyl-3a-hydroxy-2-oxohexahydrocyclopenta[d]imidazol-1(2H)-yl)carbamate (3t):**

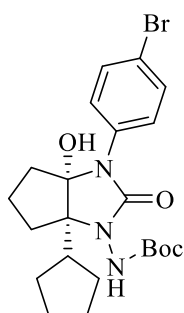

A white solid; 75.7 mg; isolated yield = 79%; m.p. 132.5 – 133.0 °C; dr > 20:1.  $[\alpha]^{21.0}_D = +142.01$  (*c* 0.10, EA); HPLC (IG-3 column, *i*-propanol/*n*-hexane = 10/90, flow rate 1.0 mL/min,  $\lambda = 254$  nm), product:  $t_1 = 5.83$  min (minor),  $t_2 = 19.10$  min (major), *ee* = 93%;  $^1\text{H}$  NMR (400 MHz, DMSO)  $\delta$  8.90 – 8.35 (m, 1H), 7.61 – 7.52 (m, 2H), 7.48 – 7.41 (m, 2H), 6.71 – 6.25 (m, 1H), 2.39 – 2.17 (m, 1H), 2.08 – 1.75 (m, 4H), 1.71 – 1.47 (m, 6H), 1.44 – 1.26 (m, 13H).  $^{13}\text{C}$  NMR (100 MHz, DMSO)  $\delta$  156.3, 155.0, 137.0, 131.7, 127.9, 127.6, 117.9, 97.5, 80.0, 73.7, 44.78, 38.4, 33.0, 31.0, 28.5, 25.7, 21.4. HRMS (ESI) *m/z* calcd for  $\text{C}_{22}\text{H}_{30}\text{BrN}_3\text{O}_4\text{Na}^+$  [*M* + Na] $^+ = 502.1312$ , found = 502.1309.

**Methyl (3aS,6aS)-3-((tert-butoxycarbonyl)amino)-1-(4-chlorophenyl)-6a-hydroxy-2-oxohexahydrocyclopenta[d]imidazole-3a(1H)-carboxylate (3u):**

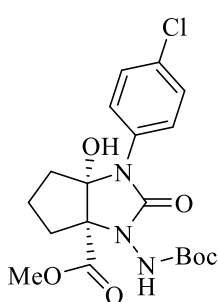

A white solid; 37.4 mg; isolated yield = 44%; m.p. 152.3 – 152.9 °C; dr > 20:1;  $[\alpha]^{21.0}_D = +121.05$  (*c* 0.10, EA); HPLC (IF-3 column, *i*-propanol/*n*-hexane = 30/70, flow rate 1.0 mL/min,  $\lambda = 254$  nm), product:  $t_1 = 6.93$  min (major),  $t_2 = 15.50$  min (minor), *ee* = 91%;  $^1\text{H}$  NMR (400 MHz,  $\text{CDCl}_3$ )  $\delta$  8.09 – 7.54 (m, 1H), 7.09 (d, *J* = 8.4 Hz, 2H), 6.96 (d, *J* = 8.4 Hz, 2H), 5.33 (s, 1H), 3.89 (s, 3H), 2.51 – 2.38 (m, 1H), 2.35 – 2.27 (m, 1H), 1.85 – 1.78 (m, 2H), 1.77 – 1.66 (m, 2H), 1.48 (s, 9H);  $^{13}\text{C}$  NMR (100 MHz,  $\text{CDCl}_3$ )  $\delta$  171.0, 156.2, 155.6, 133.9, 131.4, 128.3, 126.0, 98.5, 81.2, 78.0, 53.2, 35.3, 33.3, 28.2, 22.2. HRMS (ESI) *m/z* calcd for  $\text{C}_{18}\text{H}_{24}\text{ClN}_3\text{O}_6\text{Na}^+$  [*M* + Na] $^+ = 464.1559$ , found = 464.1561.

**tert-Butyl ((3aS,6aS)-3-(4-bromophenyl)-3a-hydroxy-2-oxohexahydrocyclopenta[d]imidazol-1(2H)-yl)carbamate (3v):**

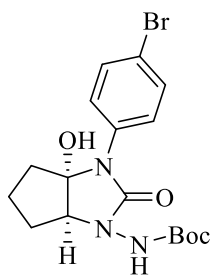

A white solid; 60.8 mg; isolated yield = 74%; m.p. 129.7 – 130.3 °C; dr > 20:1.  $[\alpha]^{21.0}_D = +42.00$  (*c* 0.10, EA); HPLC (IG-3 column, *i*-propanol/*n*-hexane = 10/90, flow rate 1.0 mL/min,  $\lambda = 254$  nm), product:  $t_1 = 12.30$  min (minor),  $t_2 = 87.70$  min (major), *ee* = 75%;  $^1\text{H}$  NMR (400 MHz, DMSO)  $\delta$  9.23 – 8.56 (m, 1H), 7.73 – 7.36 (m, 4H), 6.81 (s, 1H), 3.78 (s, 1H), 1.92 – 1.84 (m, 1H), 1.82 – 1.60 (m, 4H), 1.60 – 1.47 (m, 1H), 1.42 (s, 9H).  $^{13}\text{C}$  NMR (100 MHz, DMSO)  $\delta$  155.4, 137.4, 131.8, 126.3, 117.4, 95.8, 80.3, 68.5, 38.0, 30.2, 28.5, 23.5. HRMS (ESI) *m/z* calcd for  $\text{C}_{17}\text{H}_{22}\text{BrN}_3\text{O}_4\text{Na}^+$  [*M* + Na] $^+ = 434.0686$ , found = 434.0681.

**tert-Butyl ((3aS,8aS)-3-(4-bromophenyl)-3a-hydroxy-8a-methyl-2-oxo-3,3a,8,8a-tetrahydroindeno[1,2-d]imidazol-1(2H)-yl)carbamate (3w):**

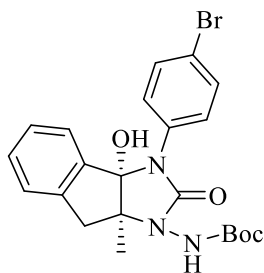

A white solid; 57.7 mg; isolated yield = 61%; m.p. 129.6 – 130.4 °C; dr > 20:1.  $[\alpha]^{21.0}_D = -88.00$  (*c* 0.10, EA); HPLC (IG-3 column, *i*-propanol/*n*-hexane = 10/90, flow rate 1.0 mL/min,  $\lambda = 254$  nm), product:  $t_1 = 5.83$  min (major),  $t_2 = 6.73$  min (minor), *ee* = 92%;  $^1\text{H}$  NMR (400 MHz, DMSO)  $\delta$  9.14 – 8.73 (m, 1H), 7.62 – 7.48 (m, 2H), 7.35 – 7.15 (m, 4H), 7.12 – 7.03 (m, 2H), 6.80 – 6.74 (m, 1H), 3.48 – 3.37 (m, 1H), 2.94 – 2.83 (m, 1H), 1.44 (s, 9H), 1.32 (s, 3H).  $^{13}\text{C}$  NMR (100MHz, DMSO)  $\delta$  156.1 154.8, 141.0, 140.4 136.4, 131.8 129.8, 129.8 126.8, 125.7, 124.9, 119.2, 96.7 80.1 71.3 43.0, 28.5, 19.2. HRMS (ESI) *m/z* calcd for  $\text{C}_{22}\text{H}_{24}\text{BrN}_3\text{O}_4\text{Na}^+$  [*M* + Na] $^+ = 496.0842$ , found = 496.0840.

**tert-Butyl ((3aS,7aS)-3-(4-bromophenyl)-3a-hydroxy-7a-methyl-2-oxooctahydro-1H-benzo[d]imidazol-1-yl)carbamate (3x):**

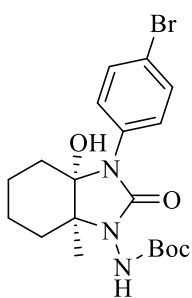

A white solid; 66.7 mg; isolated yield = 76%; m.p. 133.1 – 133.8 °C; dr > 20:1.  $[\alpha]^{21.0}_D = -76.00$  (*c* 0.10, EA); HPLC (IH-3 column, *i*-propanol/*n*-hexane = 10/90, flow rate 1.0 mL/min,  $\lambda = 254$  nm), product:  $t_1 = 9.74$  min (minor),  $t_2 = 14.71$  min (major), *ee* = 90%;  $^1\text{H}$  NMR (400 MHz, DMSO)  $\delta$  8.90 – 8.25 (m, 1H), 7.62 – 7.47 (m, 2H), 7.38 – 7.20 (m, 2H), 6.24 (s, 1H), 1.82 – 1.46 (m, 5H), 1.45 – 1.34 (m, 10H), 1.27 – 1.13 (m, 5H).  $^{13}\text{C}$  NMR (100 MHz, DMSO)  $\delta$  156.8, 156.4, 136.3, 131.8, 130.0, 119.3, 88.4, 79.9, 64.8, 34.7, 31.2, 28.5, 21.76, 20.6, 17.7. HRMS (ESI) *m/z* calcd for  $\text{C}_{19}\text{H}_{26}\text{BrN}_3\text{O}_4\text{Na}^+$  [*M* + Na] $^+ = 462.0999$ , found = 462.0995.

**tert-Butyl ((3aS,7aS)-1-(4-bromophenyl)-7a-hydroxy-3a-methyl-2-oxohexahydro-pyrano[3,4-d]imidazol-3(2H)-yl)carbamate (3y):**



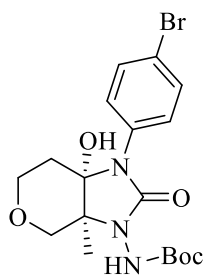

A colorless oil; 68.8 mg; isolated yield = 78%; dr > 20:1.  $[\alpha]^{21.0}_D = +157.00$  (*c* 0.10, EA); HPLC (IE-3 column, *i*-propanol/*n*-hexane = 30/70, flow rate 1.0 mL/min,  $\lambda = 254$  nm), product:  $t_1 = 4.18$  min (minor),  $t_2 = 4.67$  min (major), *ee* = 90%;  $^1\text{H NMR}$  (400 MHz,  $\text{CDCl}_3$ )  $\delta$  7.54 – 7.35 (m, 2H), 7.31 – 7.17 (m, 2H), 7.06 (s, 1H), 5.84 (s, 1H), 3.91 – 3.51 (m, 2H), 3.39 – 3.05 (m, 2H), 2.00 – 1.77 (m, 2H), 1.42 (s, 9H), 1.34 (s, 3H).  $^{13}\text{C NMR}$  (100 MHz,  $\text{CDCl}_3$ )  $\delta$  157.6, 157.2, 134.2, 132.1, 128.5, 120.7, 88.5, 82.8, 74.8, 64.7, 63.2, 29.1, 28.1, 14.2. HRMS (ESI) *m/z* calcd for  $\text{C}_{18}\text{H}_{24}\text{BrN}_3\text{O}_5\text{Na}^+$  [*M* + *Na*] $^+ = 464.0791$ , found = 464.0789.

**tert-Butyl ((3aS,8aS)-3-(4-bromophenyl)-3a-hydroxy-8a-methyl-2-oxo-3,3a,8,8a-tetrahydroindenol[1,2-d]imidazol-1(2H)-yl)carbamate (3z):**

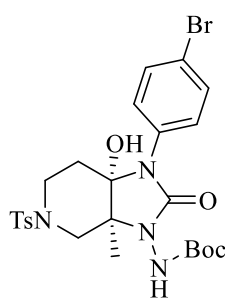

A colorless oil; 84.3 mg; isolated yield = 71%; dr > 20:1.  $[\alpha]^{21.0}_D = -127.01$  (*c* 0.10, EA); HPLC (IF-3 column, *i*-propanol/*n*-hexane = 10/90, flow rate 1.0 mL/min,  $\lambda = 254$  nm), product:  $t_1 = 4.44$  min (minor),  $t_2 = 8.27$  min (major), *ee* = 92%;  $^1\text{H NMR}$  (400 MHz,  $\text{CDCl}_3$ )  $\delta$  7.57 – 7.46 (m, 3H), 7.27 – 7.16 (m, 5H), 7.04 (s, 2H), 3.70 – 2.70 (m, 4H), 2.35 (s, 3H), 2.02 – 1.90 (m, 1H), 1.86 – 1.74 (m, 1H), 1.42 (s, 9H), 1.33 (s, 3H).  $^{13}\text{C NMR}$  (100 MHz,  $\text{CDCl}_3$ )  $\delta$  156.6, 156.5, 144.0, 133.9, 133.6, 131.8, 130.0, 127.5, 127.2, 120.1, 87.7, 82.6, 65.3, 51.3, 42.0, 28.2, 27.7, 21.6, 15.2. HRMS (ESI) *m/z* calcd for  $\text{C}_{25}\text{H}_{31}\text{BrN}_4\text{O}_6\text{SNa}^+$  [*M* + *Na*] $^+ = 617.1040$ , found = 617.1035.

**tert-Butyl (3aS,7aS)-1-(4-bromophenyl)-3-((tert-butoxycarbonyl)amino)-7a-hydroxy-3a-methyl-2-oxooctahydro-5H-imidazo[4,5-c]pyridine-5-carboxylate (3a'):**

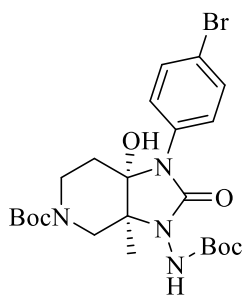

A colorless oil; 79.9 mg; isolated yield = 74%; dr > 20:1.  $[\alpha]^{21.0}_D = -158.01$  (*c* 0.10, EA); HPLC (ID-3 column, *i*-propanol/*n*-hexane = 10/90, flow rate 1.0 mL/min,  $\lambda = 254$  nm), product:  $t_1 = 6.89$  min (minor),  $t_2 = 7.44$  min (major), *ee* = 96%;  $^1\text{H NMR}$  (400 MHz,  $\text{CDCl}_3$ )  $\delta$  7.51 – 7.28 (m, 3H), 7.21 – 7.14 (m, 1H), 3.92 – 2.69 (m, 4H), 2.02 – 1.75 (m, 2H), 1.47 (s, 18H), 1.30 (s, 3H).  $^{13}\text{C NMR}$  (100 MHz,  $\text{CDCl}_3$ )  $\delta$  155.8, 154.0, 154.0, 134.7, 131.5, 126.6, 119.4, 87.7, 82.0, 80.7, 77.3, 65.3, 40.0, 39.6, 28.2, 15.7. HRMS (ESI) *m/z* calcd for  $\text{C}_{23}\text{H}_{33}\text{BrN}_4\text{O}_6\text{Na}^+$  [*M* + *Na*] $^+ = 563.1475$ , found = 563.1472.

**Benzyl (3aS,7aS)-1-(4-bromophenyl)-3-((tert-butoxycarbonyl)amino)-7a-hydroxy-3a-methyl-2-oxooctahydro-5H-imidazo[4,5-c]pyridine-5-carboxylate (3b'):**

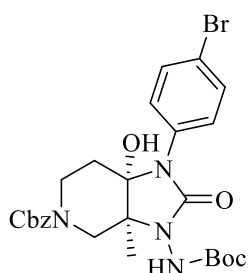

A colorless oil; 99.8 mg; isolated yield = 87%; dr > 20:1.  $[\alpha]^{21.0}_D = -188.01$  (*c* 0.10, EA); HPLC (IK-3 column, *i*-propanol/*n*-hexane = 10/90, flow rate 1.0 mL/min,  $\lambda = 254$  nm), product:  $t_1 = 6.03$  min (minor),  $t_2 = 6.59$  min (major), *ee* = 95%;  $^1\text{H NMR}$  (400 MHz,  $\text{CDCl}_3$ )  $\delta$  7.62 – 7.29 (m, 6H), 7.20 – 7.04 (m, 3H), 5.32 – 4.96 (m, 2H), 3.90 – 2.74 (m, 4H), 2.06 – 1.76 (m, 2H), 1.49 (s, 9H), 1.33 (s, 3H).  $^{13}\text{C NMR}$  (100 MHz,  $\text{CDCl}_3$ )  $\delta$  155.2, 155.1, 153.8, 133.2, 130.7, 130.4, 127.6, 127.23, 127.3, 127.1, 125.4, 118.3, 86.5, 80.9, 76.3, 76.0, 75.7, 66.6, 64.4, 63.7, 39.2, 38.8, 27.1, 14.7. HRMS (ESI) *m/z* calcd for  $\text{C}_{26}\text{H}_{31}\text{BrN}_4\text{O}_6\text{Na}^+$  [*M* + *Na*] $^+ = 597.1319$ , found = 597.1329.

***tert*-Butyl ((3*aR*,6*aS*)-7-(4-chlorophenyl)-2,8-dioxotetrahydro-4*H*-3*a*,6*a*-(epimino) methanoimino)cyclopenta[*b*]furan-9-yl)carbamate (4a):**

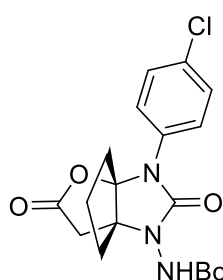

A white solid; 70.0 mg; isolated yield = 86%; m.p. 120.4 – 120.7 °C; dr > 20:1.  $[\alpha]^{21.0}_D = +434.02$  (*c* 0.10, EA); HPLC (IG-3 column, *i*-propanol/*n*-hexane = 30/70, flow rate 1.0 mL/min,  $\lambda = 254$  nm), product:  $t_1 = 10.03$  min (major),  $t_2 = 11.08$  min (minor), *ee* = 93%;  $^1\text{H NMR}$  (400 MHz,  $\text{CDCl}_3$ )  $\delta$  7.57 – 7.43 (m, 2H), 7.33 – 7.28 (m, 2H), 7.20 – 6.92 (m, 1H), 3.43 – 3.16 (m, 1H), 2.78 – 2.60 (m, 1H), 2.49 – 2.26 (m, 1H), 2.24 – 2.04 (m, 2H), 1.99 – 1.87 (m, 2H), 1.87 – 1.78 (m, 1H), 1.46 (s, 9H).  $^{13}\text{C NMR}$  (100 MHz,  $\text{CDCl}_3$ )  $\delta$  173.7, 155.7, 154.1, 134.2, 131.6, 129.2, 124.7, 105.1, 82.5, 71.4, 39.7, 37.5, 36.6, 28.1, 23.7. HRMS (ESI) *m/z* calcd for  $\text{C}_{19}\text{H}_{22}\text{ClN}_3\text{O}_5\text{Na}^+$  [*M* + *Na*] $^+ = 430.1140$ , found = 430.1139.

***tert*-Butyl ((3*aR*,6*aS*)-7-(4-bromophenyl)-2,8-dioxotetrahydro-4*H*-3*a*,6*a*-(epimino) methanoimino)cyclopenta[*b*]furan-9-yl)carbamate (4b):**

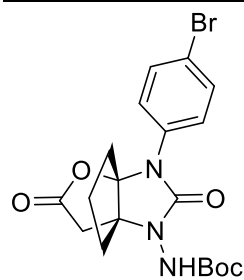

A white solid; 74.9 mg; isolated yield = 83%; m.p. 114.2 – 114.8 °C; dr > 20:1.  $[\alpha]^{21.0}_D = +466.02$  (*c* 0.10, EA); HPLC (IG-3 column, *i*-propanol/*n*-hexane = 30/70, flow rate 1.0 mL/min,  $\lambda = 254$  nm), product:  $t_1 = 10.84$  min (major),  $t_2 = 12.65$  min (minor), *ee* = 93%;  $^1\text{H NMR}$  (400 MHz, DMSO)  $\delta$  9.56 – 8.60 (m, 1H), 7.75 – 7.58 (m, 2H), 7.50 – 7.37 (m, 2H), 3.22 – 2.97 (m, 2H), 2.35 – 1.90 (m, 4H), 1.89 – 1.64 (m, 2H), 1.49 – 1.34 (m, 9H).  $^{13}\text{C NMR}$  (100 MHz, DMSO)  $\delta$  174.5, 156.0, 153.5, 135.7, 132.5, 125.0, 118.2, 104.6, 81.0, 71.7, 39.0, 36.5, 36.1, 28.4, 28.1, 23.8. HRMS (ESI) *m/z* calcd for  $\text{C}_{19}\text{H}_{22}\text{BrN}_3\text{O}_5\text{Na}^+$  [*M* + *Na*] $^+ = 474.0635$ , found = 474.0631.

***tert*-Butyl ((3*aR*,6*aS*)-7-(4-iodophenyl)-2,8-dioxotetrahydro-4*H*-3*a*,6*a*-(epimino) ethanoimino)cyclopenta[*b*]furan-9-yl)carbamate (4c):**

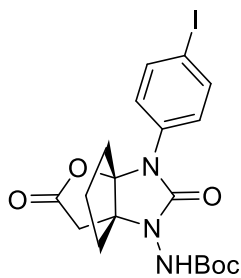

A white solid; 91.8 mg; isolated yield = 92%; m.p. 117.1 – 117.6 °C; dr > 20:1.  $[\alpha]^{21.0}_D = +473.02$  (*c* 0.10, EA); HPLC IG-3 column, *i*-propanol/*n*-hexane = 30/70, flow rate 1.0 mL/min,  $\lambda = 254$  nm), product:  $t_1 = 14.52$  min (major),  $t_2 = 15.71$  min (minor), *ee* = 96%;  $^1\text{H NMR}$  (400 MHz,  $\text{CDCl}_3$ )  $\delta$  7.74 – 7.59 (m, 2H), 7.38 – 7.28 (m, 2H), 7.14 – 6.89 (m, 1H), 3.44 – 3.23 (m, 1H), 2.72 – 2.62 (m, 1H), 2.47 – 2.26 (m, 1H), 2.23 – 2.05 (m, 2H), 2.01 – 1.88 (m, 1H), 1.86 – 1.78 (m, 2H), 1.46 (s, 9H).  $^{13}\text{C NMR}$  (100 MHz,  $\text{CDCl}_3$ )  $\delta$  173.6, 155.7, 153.9, 138.1, 135.5, 125.0, 105.0, 90.3, 82.6, 71.4, 39.7, 37.5, 36.6, 28.1, 23.7. HRMS (ESI) *m/z* calcd for  $\text{C}_{19}\text{H}_{22}\text{IN}_3\text{O}_5\text{Na}^+$  [*M* + *Na*] $^+ = 522.0496$ , found = 522.0497.

**tert-Butyl ((3*aR*,6*aS*)-7-(4-methoxyphenyl)-2,8-dioxotetrahydro-4*H*-3*a*,6*a*-(epiminomethanoimino)cyclopenta[*b*]furan-9-yl)carbamate (4d):**

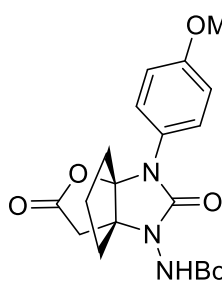

A white solid; 59.6 mg; isolated yield = 74%; m.p. 126.6 – 127.4 °C; dr > 20:1.  $[\alpha]^{21.0}_D = +361.01$  (*c* 0.10, EA); HPLC (IG-3 column, *i*-propanol/*n*-hexane = 30/70, flow rate 1.0 mL/min,  $\lambda = 254$  nm), product:  $t_1 = 17.41$  min (major),  $t_2 = 18.34$  min (minor), *ee* = 94%;  $^1\text{H NMR}$  (400 MHz,  $\text{CDCl}_3$ )  $\delta$  7.41 – 7.34 (m, 2H), 7.17 – 6.95 (m, 1H), 6.93 – 6.80 (m, 2H), 3.78 (s, 3H), 3.40 – 3.25 (m, 1H), 2.72 – 2.58 (m, 1H), 2.54 – 2.25 (m, 1H), 2.19 – 2.09 (m, 1H), 2.07 – 1.95 (m, 1H), 1.95 – 1.75 (m, 3H), 1.46 (s, 9H).  $^{13}\text{C NMR}$  (100 MHz,  $\text{CDCl}_3$ )  $\delta$  173.9, 158.2, 155.8, 154.8, 128.1, 126.4, 114.4, 105.5, 82.3, 71.2, 55.5, 40.0, 37.6, 36.4, 28.1, 23.6. HRMS (ESI) *m/z* calcd for  $\text{C}_{20}\text{H}_{25}\text{N}_3\text{O}_6\text{Na}^+$  [*M* + *Na*] $^+ = 426.1635$ , found = 426.1634.

**Methyl ((3*aR*,6*aS*)-7-(4-chlorophenyl)-2,8-dioxotetrahydro-4*H*-3*a*,6*a*-(epiminomethanoimino)cyclopenta[*b*]furan-9-yl)carbamate (4e):**

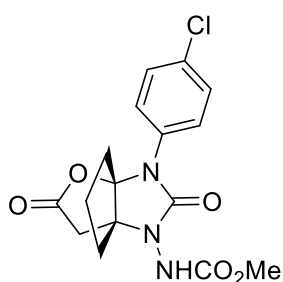

A white solid; 51.1 mg; isolated yield = 70%; m.p. 116.6 – 117.3 °C; dr > 20:1.  $[\alpha]^{21.0}_D = +192.01$  (*c* 0.10, EA); HPLC (IG-3 column, *i*-propanol/*n*-hexane = 30/70, flow rate 1.0 mL/min,  $\lambda = 254$  nm), product:  $t_1 = 19.88$  min (major),  $t_2 = 21.82$  min (minor), *ee* = 96%;  $^1\text{H NMR}$  (400 MHz,  $\text{CDCl}_3$ )  $\delta$  7.50 – 7.44 (m, 2H), 7.37 – 7.30 (m, 3H), 3.77 (s, 3H), 3.36 – 3.18 (m, 1H), 2.75 – 2.61 (m, 1H), 2.51 – 2.27 (m, 1H), 2.20 – 2.05 (m, 2H), 1.99 – 1.77 (m, 3H).  $^{13}\text{C NMR}$  (100 MHz,  $\text{CDCl}_3$ )  $\delta$  173.4, 157.4, 154.2, 134.0, 131.8, 129.3, 124.8, 105.1, 71.5, 53.6, 39.5, 37.3, 36.6, 23.7. HRMS (ESI) *m/z* calcd for  $\text{C}_{16}\text{H}_{16}\text{ClN}_3\text{O}_5\text{Na}^+$  [*M* + *Na*] $^+ = 388.0671$ , found = 388.0667.

**Ethyl ((3*aR*,6*aS*)-7-(4-chlorophenyl)-2,8-dioxotetrahydro-4*H*-3*a*,6*a*-(epiminomethanoimino)cyclopenta[*b*]furan-9-yl)carbamate (4f):**

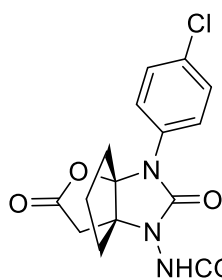

A white solid; 50.8 mg; isolated yield = 67%; m.p. 115.2 – 115.8 °C; dr > 20:1.  $[\alpha]^{21.0}_D = +318.01$  (*c* 0.10, EA); HPLC (IG-3 column, *i*-propanol/*n*-hexane = 30/70, flow rate 1.0 mL/min,  $\lambda = 254$  nm), product:  $t_1 = 12.21$  min (major),  $t_2 = 17.04$  min (minor), *ee* = 97%;  $^1\text{H NMR}$  (400 MHz,  $\text{CDCl}_3$ )  $\delta$  7.50 – 7.45 (m, 2H), 7.35 – 7.29 (m, 2H), 7.27 (s, 1H), 4.26 – 4.17 (m, 2H), 3.40 – 3.19 (m, 1H), 2.75 – 2.59 (m, 1H), 2.51 – 2.30 (m, 1H), 2.24 – 2.03 (m, 2H), 2.00 – 1.76 (m, 3H), 1.27 (t, *J* = 7.1 Hz, 3H).  $^{13}\text{C NMR}$  (100 MHz,  $\text{CDCl}_3$ )  $\delta$  173.5, 156.9, 154.1, 134.0, 131.7, 129.3, 124.7, 105.1, 71.5, 62.9, 39.6, 37.3, 36.6, 23.7, 14.3. HRMS (ESI) *m/z* calcd for  $\text{C}_{17}\text{H}_{18}\text{ClN}_3\text{O}_5\text{Na}^+$  [*M* + *Na*] $^+$  = 402.0827, found = 402.0825.

**Benzyl ((3*aR*,6*aS*)-7-(4-chlorophenyl)-2,8-dioxotetrahydro-4*H*-3*a*,6*a*-(epiminomethanoimino)cyclopenta[*b*]furan-9-yl)carbamate (4g):**

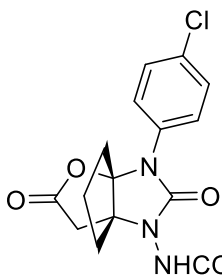

A white solid; 67.9 mg; isolated yield = 77%; m.p. 119.1 – 119.8 °C; dr > 20:1.  $[\alpha]^{21.0}_D = +217.01$  (*c* 0.10, EA); HPLC (IG-3 column, *i*-propanol/*n*-hexane = 30/70, flow rate 1.0 mL/min,  $\lambda = 254$  nm), product:  $t_1 = 25.76$  min (major),  $t_2 = 35.17$  min (minor), *ee* = 94%;  $^1\text{H NMR}$  (400 MHz,  $\text{CDCl}_3$ )  $\delta$  7.64 – 7.40 (m, 3H), 7.36 – 7.28 (m, 7H), 5.26 – 5.10 (m, 2H), 3.42 – 3.11 (m, 1H), 2.71 – 2.52 (m, 1H), 2.45 – 2.20 (m, 1H), 2.20 – 2.02 (m, 2H), 1.93 – 1.77 (m, 3H).  $^{13}\text{C NMR}$  (100 MHz,  $\text{CDCl}_3$ )  $\delta$  173.4, 156.8, 154.1, 135.2, 133.9, 131.8, 129.3, 128.7, 128.6, 128.4, 124.9, 105.1, 71.5, 68.4, 39.6, 37.3, 36.6, 23.6. HRMS (ESI) *m/z* calcd for  $\text{C}_{22}\text{H}_{20}\text{ClN}_3\text{O}_5\text{Na}^+$  [*M* + *Na*] $^+$  = 464.0984, found = 464.0983.

***tert*-Butyl ((3*aR*,7*aS*)-8-(4-iodophenyl)-2,9-dioxohexahydro-3*a*,7*a*-(epiminomethanoimino)benzofuran-10-yl)carbamate (4h):**

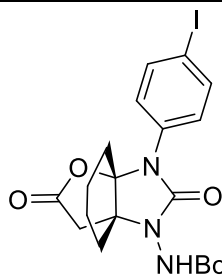

A white solid; 86.2 mg; isolated yield = 84%; m.p. 119.3 – 119.7 °C; dr > 20:1.  $[\alpha]^{21.0}_D = +382.02$  (*c* 0.10, EA); HPLC (IG-3 column, *i*-propanol/*n*-hexane = 30/70, flow rate 1.0 mL/min,  $\lambda = 254$  nm), product:  $t_1 = 18.68$  min (major),  $t_2 = 22.77$  min (minor), *ee* = 90%;  $^1\text{H NMR}$  (400 MHz,  $\text{CDCl}_3$ )  $\delta$  7.76 – 7.67 (m, 2H), 7.17 – 7.12 (m, 2H), 6.91 (s, 1H), 3.17 – 2.96 (m, 1H), 2.75 – 2.63 (m, 1H), 2.49 – 2.35 (m, 1H), 2.19 – 2.02 (m, 1H), 1.86 – 1.73 (m, 1H), 1.65 – 1.53 (m, 2H), 1.46 (s, 9H), 1.37 – 1.15 (m, 3H).  $^{13}\text{C NMR}$  (100 MHz,  $\text{CDCl}_3$ )  $\delta$  172.0, 155.6, 155.5, 154.9, 138.4, 133.9, 128.8, 97.1, 92.7, 65.5, 36.4, 29.7, 29.4, 28.0, 20.0, 19.2. HRMS (ESI) *m/z* calcd for  $\text{C}_{20}\text{H}_{24}\text{IN}_3\text{O}_5\text{Na}^+$  [*M* + *Na*] $^+$  = 536.0653, found = 536.0648.

***tert*-Butyl ((4*aR*,7*aS*)-8-(4-bromophenyl)-2,9-dioxotetrahydro-2*H*,5*H*-4*a*,7*a*-(epiminomethanoimino)cyclopenta[*b*]pyran-10-yl)carbamate (4i):**

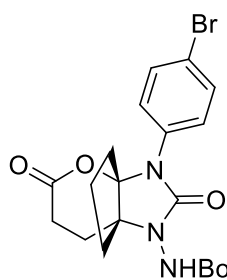

A colorless oil; 39.1 mg; isolated yield = 56%; dr > 20:1.  $[\alpha]^{21.0}_D = +33.30$  (*c* 0.10, EA); HPLC (IG-3 column, *i*-propanol/*n*-hexane = 30/70, flow rate 1.0 mL/min,  $\lambda = 254$  nm), product:  $t_1 = 7.12$  min (minor),  $t_2 = 9.22$  min (major), *ee* = 96%;  $^1\text{H NMR}$  (400 MHz,  $\text{CDCl}_3$ )  $\delta$  7.48 – 7.38 (m, 2H), 7.32 – 7.23 (m, 2H), 6.61 (s, 1H), 2.59 – 2.28 (m, 2H), 2.27 – 2.02 (m, 2H), 2.02 – 1.86 (m, 1H), 1.84 – 1.53 (m, 5H), 1.43 (s, 9H).  $^{13}\text{C NMR}$  (101 MHz,  $\text{CDCl}_3$ )  $\delta$  171.1, 154.9, 134.1, 132.3, 127.7, 120.7, 101.6, 66.6, 37.9, 29.7, 28.1, 27.8, 26.1, 21.8. HRMS (ESI) *m/z* calcd for  $\text{C}_{20}\text{H}_{24}\text{BrN}_3\text{O}_5\text{Na}^+$  [*M* + *Na*] $^+ = 488.0784$ , found = 488.0792.

**(3aR,6aS)-3a-Allyl-3-amino-1-(4-bromophenyl)-6a-hydroxyhexahydrocyclopenta[d]imidazol-2(1H)-one (5):**

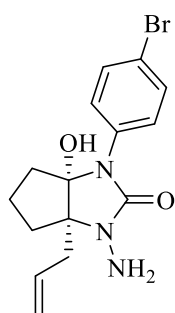

A colorless oil; 61.1 mg; isolated yield = 87%; dr > 20:1.  $[\alpha]^{21.0}_D = +104.00$  (*c* 0.10, EA); HPLC (IG-3 column, *i*-propanol/*n*-hexane = 10/90, flow rate 1.0 mL/min,  $\lambda = 254$  nm), product:  $t_1 = 15.76$  min (minor),  $t_2 = 18.11$  min (major), *ee* = 92%;  $^1\text{H NMR}$  (400 MHz, DMSO)  $\delta$  7.51 (s, 4H), 6.54 (s, 1H), 6.18 – 5.85 (m, 1H), 5.17 – 4.99 (m, 2H), 4.27 (s, 2H), 2.48 – 2.41 (m, 1H), 2.01 – 1.86 (m, 2H), 1.78 – 1.42 (m, 3H), 1.36 – 1.15 (m, 2H).  $^{13}\text{C NMR}$  (100 MHz, DMSO)  $\delta$  157.0, 137.5, 136.0, 131.7, 126.6, 118.3, 117.0, 96.5, 38.9, 37.7, 33.1, 21.3. HRMS (ESI) *m/z* calcd for  $\text{C}_{15}\text{H}_{18}\text{BrN}_3\text{O}_2\text{Na}^+$  [*M* + *Na*] $^+ = 374.0474$ , found = 374.0472.

**Ethyl N-((3aS,6aS)-3-(4-chlorophenyl)-3a-hydroxy-6a-methyl-2-oxohexahydrocyclopenta[d]imidazol-1(2H)-yl)-N-(ethoxycarbonyl)glycinate (6):**

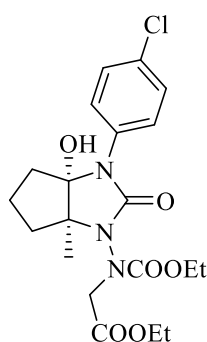

A colorless oil; 69.4 mg; isolated yield = 79%; dr = 1.2:1.  $[\alpha]^{21.0}_D = +331.01$  (*c* 0.10, EA); HPLC (IF-3 column, *i*-propanol/*n*-hexane = 30/70, flow rate 1.0 mL/min,  $\lambda = 254$  nm), major product:  $t_1 = 5.80$  min (minor),  $t_2 = 7.49$  min (major), *ee* = 94%; minor product:  $t_1 = 4.72$  min (major),  $t_2 = 6.83$  min (minor), *ee* = 94%;  $^1\text{H NMR}$  (400 MHz,  $\text{CDCl}_3$ )  $\delta$  7.55 – 7.38 (m, 2H), 7.30 – 7.15 (m, 2H), 5.34 – 4.33 (m, 2H), 4.31 – 4.09 (m, 4H), 3.97 – 3.43 (m, 1H), 2.71 – 2.29 (m, 1H), 2.08 – 1.94 (m, 1H), 1.89 – 1.41 (m, 5H), 1.39 – 1.26 (m, 6H), 1.24 – 1.22 (m, 2H).  $^{13}\text{C NMR}$  (100 MHz,  $\text{CDCl}_3$ )  $\delta$  169.0, 157.0, 155.0, 134.78, 131.2, 128.8, 126.3, 98.2, 70.1, 63.8, 61.5, 55.1, 40.3, 34.7, 21.1, 17.6, 14.2. HRMS (ESI) *m/z* calcd for  $\text{C}_{20}\text{H}_{26}\text{ClN}_3\text{O}_6\text{Na}^+$  [*M* + *Na*] $^+ = 462.1402$ , found = 462.1401.

**(3aS,6aS)-1-(4-Chlorophenyl)-6a-hydroxy-3a-methylhexahydrocyclopenta[d]imidazol-2(1H)-one (7):**

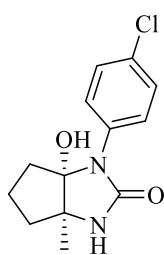

A white solid; 35.6 mg; isolated yield = 67%; m.p. 126.2 – 126.8 °C; dr > 20:1.  $[\alpha]^{21.0}_D = +88.00$  (*c* 0.10, EA); HPLC (IG-3 column, *i*-propanol/*n*-hexane = 30/70, flow rate 1.0 mL/min,  $\lambda = 254$  nm), product:  $t_1 = 4.88$  min (minor),  $t_2 = 5.44$  min (major), *ee* = 94%;  $^1\text{H NMR}$  (400 MHz, DMSO)  $\delta$  7.64 – 7.53 (m, 2H), 7.42 – 7.34 (m, 2H), 7.20 (s, 1H), 6.32 (s, 1H), 1.92 – 1.80 (m, 1H), 1.80 – 1.71 (m, 1H), 1.69 – 1.58 (m, 2H), 1.56 – 1.45 (m, 1H), 1.40 – 1.28 (m, 1H), 1.23 (s, 3H).  $^{13}\text{C NMR}$  (100 MHz, DMSO)  $\delta$  156.9, 137.5, 128.6, 128.4, 126.0, 98.7, 63.7, 41.9, 36.6, 23.2, 21.4. HRMS (ESI) *m/z* calcd for  $\text{C}_{13}\text{H}_{15}\text{ClN}_2\text{O}_2\text{Na}^+$  [*M* + *Na*] $^+ = 289.0714$ , found = 289.0710.

**(6a*S*,9a*R*)-6-(4-Bromophenyl)-6a-hydroxytetrahydro-1*H*-cyclopenta[4,5]imidazo[1,5-*b*]pyrazole-2,5(3*H*,6*H*)-dione (8):**

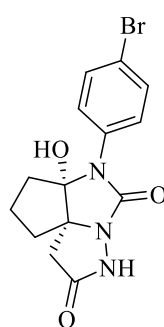

A white solid; 64.6 mg; isolated yield = 92%; m.p. 129.4 – 129.8 °C; dr > 20:1.  $[\alpha]^{21.0}_D = +120.01$  (*c* 0.10, EA); HPLC (IG-3 column, *i*-propanol/*n*-hexane = 30/70, flow rate 1.0 mL/min,  $\lambda = 254$  nm), product:  $t_1 = 4.59$  min (major),  $t_2 = 5.22$  min (minor), *ee* = 93%;  $^1\text{H NMR}$  (400 MHz, DMSO)  $\delta$  11.86 (s, 1H), 7.66 (d, *J* = 8.9 Hz, 2H), 7.43 (d, *J* = 8.9 Hz, 2H), 3.21 – 3.07 (m, 2H), 2.35 – 2.01 (m, 4H), 1.94 – 1.70 (m, 2H).  $^{13}\text{C NMR}$  (100 MHz, DMSO)  $\delta$  174.1, 152.6, 135.2, 132.7, 125.5, 118.9, 105.1, 72.2, 38.9, 36.4, 36.0, 23.9. HRMS (ESI) *m/z* calcd for  $\text{C}_{14}\text{H}_{14}\text{BrN}_3\text{O}_3\text{Na}^+$  [*M* + *Na*] $^+ = 374.0111$ , found = 374.0122.

**tert-Butyl ((3a*S*,6a*R*)-3-(4-bromophenyl)-3a-hydroxy-6a-(2-hydroxyethyl)-2-oxohexahydrocyclopenta[*d*]imidazol-1(2*H*)-yl)carbamate (9):**

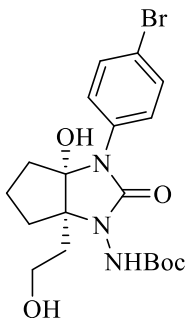

A white solid; 79.2 mg; isolated yield = 87%; m.p. 141.4 – 141.8 °C; dr > 20:1.  $[\alpha]^{21.0}_D = +134.01$  (*c* 0.10, EA); HPLC (IG-3 column, *i*-propanol/*n*-hexane = 30/70, flow rate 1.0 mL/min,  $\lambda = 254$  nm), product:  $t_1 = 4.59$  min (major),  $t_2 = 5.22$  min (minor), *ee* = 93%;  $^1\text{H NMR}$  (400 MHz, DMSO)  $\delta$  8.95 – 8.42 (m, 1H), 7.58 – 7.48 (m, 4H), 7.04 (s, 1H), 5.56 (s, 1H), 3.75 – 3.61 (m, 1H), 3.58 – 3.51 (m, 1H), 2.04 – 1.76 (m, 4H), 1.71 – 1.48 (m, 4H), 1.42 (s, 9H).  $^{13}\text{C NMR}$  (100 MHz, DMSO)  $\delta$  156.3, 154.8, 137.2, 131.7, 127.1, 117.6, 96.8, 80.2, 72.0, 57.0, 38.4, 35.5, 35.5, 28.5, 21.7. HRMS (ESI) *m/z* calcd for  $\text{C}_{19}\text{H}_{26}\text{BrN}_3\text{O}_5\text{Na}^+$  [*M* + *Na*] $^+ = 478.0948$ , found = 478.0945.

## 4. Determination of the absolute configuration

X-ray single crystal data for compound 3b to determine the absolute configuration

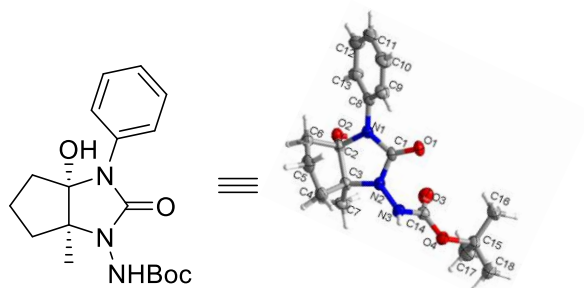

CCDC:2408880

**Table 1 Crystal data and structure refinement for 202307171\_auto.**

|                                    |                                                               |
|------------------------------------|---------------------------------------------------------------|
| Identification code                | 202307171_auto                                                |
| Empirical formula                  | C <sub>18</sub> H <sub>27</sub> N <sub>3</sub> O <sub>5</sub> |
| Formula weight                     | 365.42                                                        |
| Temperature/K                      | 293(2)                                                        |
| Crystal system                     | monoclinic                                                    |
| Space group                        | P2 <sub>1</sub>                                               |
| a/Å                                | 7.5356(3)                                                     |
| b/Å                                | 11.5149(5)                                                    |
| c/Å                                | 11.9517(5)                                                    |
| α/°                                | 90                                                            |
| β/°                                | 105.104(4)                                                    |
| γ/°                                | 90                                                            |
| Volume/Å <sup>3</sup>              | 1001.25(8)                                                    |
| Z                                  | 2                                                             |
| ρ <sub>calc</sub> /cm <sup>3</sup> | 1.212                                                         |
| μ/mm <sup>-1</sup>                 | 0.734                                                         |
| F(000)                             | 392.0                                                         |
| Crystal size/mm <sup>3</sup>       | 0.17 × 0.12 × 0.08                                            |
| Radiation                          | CuKα (λ = 1.54184)                                            |
| 2θ range for data collection/°     | 7.662 to 141.03                                               |
| Index ranges                       | -9 ≤ h ≤ 9, -14 ≤ k ≤ 12, -14 ≤ l ≤ 14                        |
| Reflections collected              | 10486                                                         |
| Independent reflections            | 3515 [R <sub>int</sub> = 0.0378, R <sub>sigma</sub> = 0.0416] |
| Data/restraints/parameters         | 3515/1/248                                                    |
| Goodness-of-fit on F <sup>2</sup>  | 1.039                                                         |
| Final R indexes [I >= 2σ (I)]      | R <sub>1</sub> = 0.0380, wR <sub>2</sub> = 0.0975             |

|                                                |                               |
|------------------------------------------------|-------------------------------|
| Final R indexes [all data]                     | $R_1 = 0.0414, wR_2 = 0.1013$ |
| Largest diff. peak/hole / $e \text{ \AA}^{-3}$ | 0.16/-0.14                    |
| Flack parameter                                | 0.01(15)                      |



## 5. NMR spectra

$^1\text{H}$  NMR (400 MHz,  $\text{DMSO-}d_6$ )

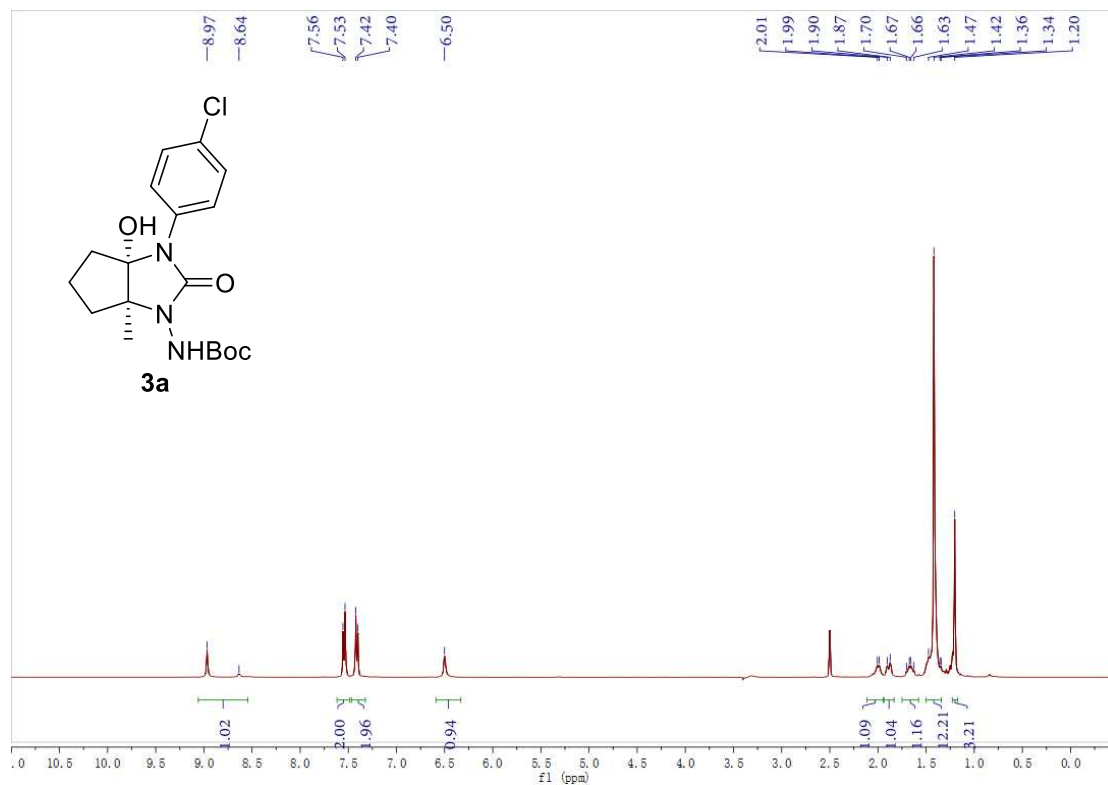

$^{13}\text{C}$  NMR (100 MHz,  $\text{DMSO-}d_6$ )

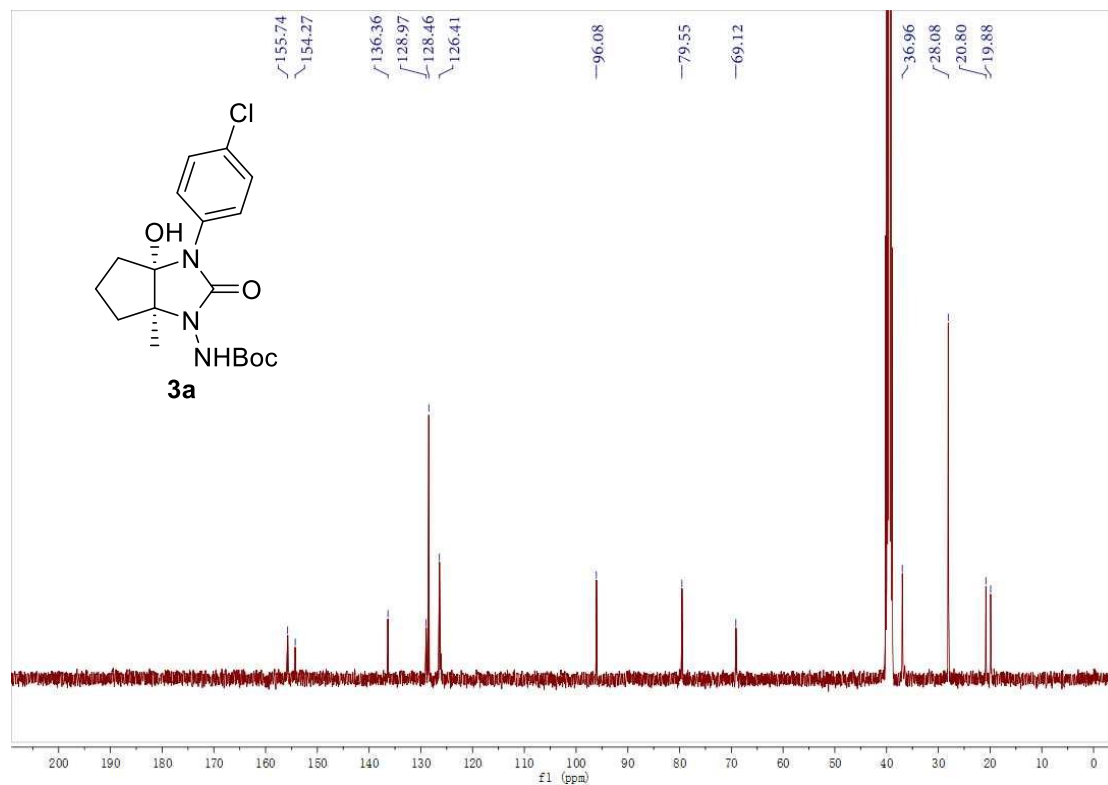

$^1\text{H}$  NMR (400 MHz,  $\text{DMSO-}d_6$ )

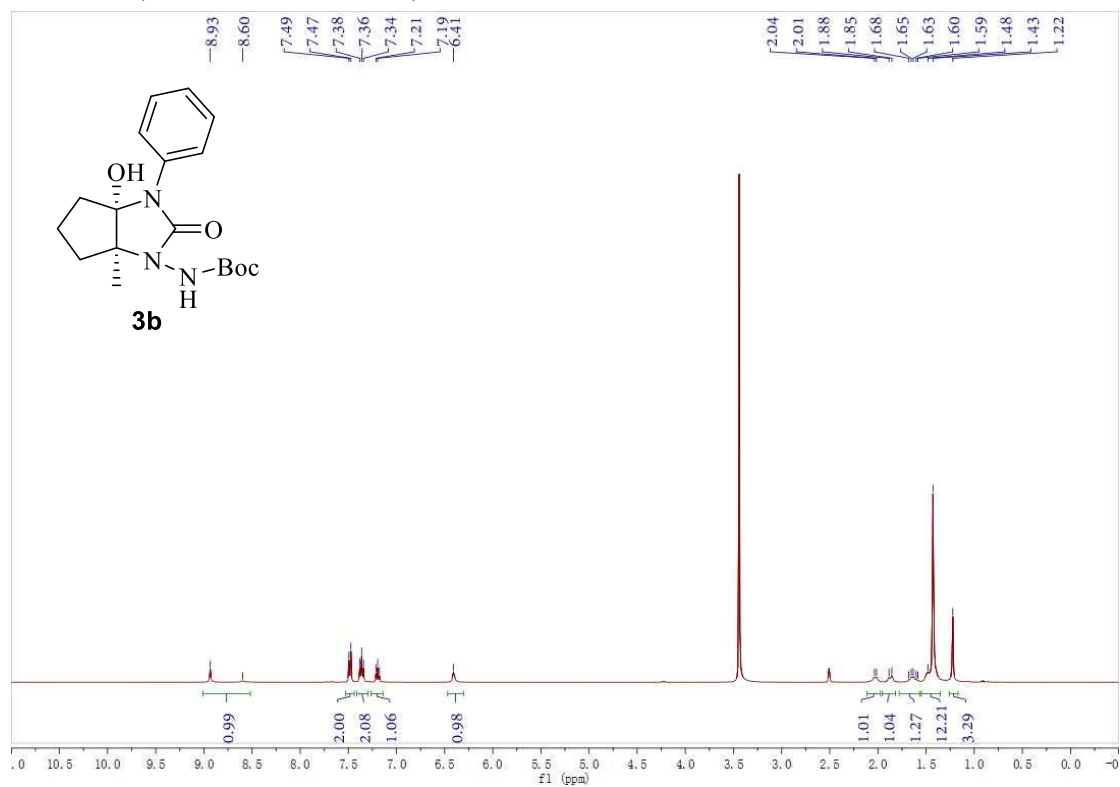

$^{13}\text{C}$  NMR (100 MHz,  $\text{DMSO-}d_6$ )

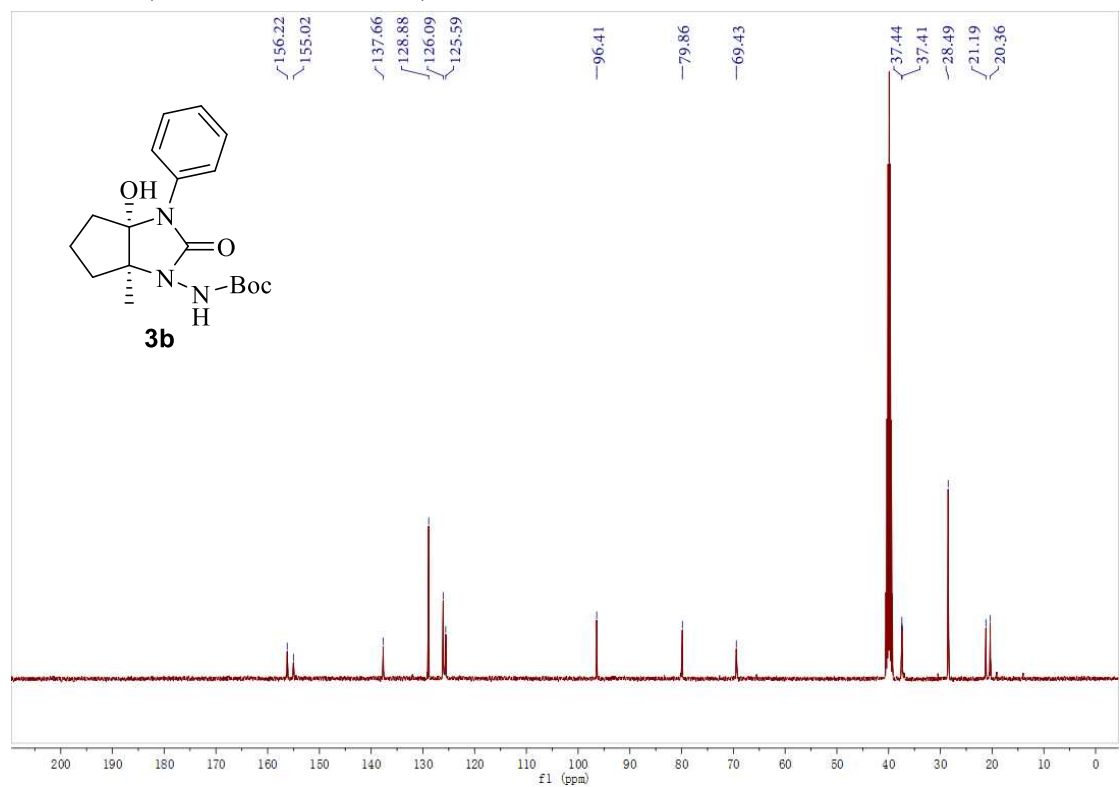

$^1\text{H}$  NMR (400 MHz,  $\text{DMSO-}d_6$ )

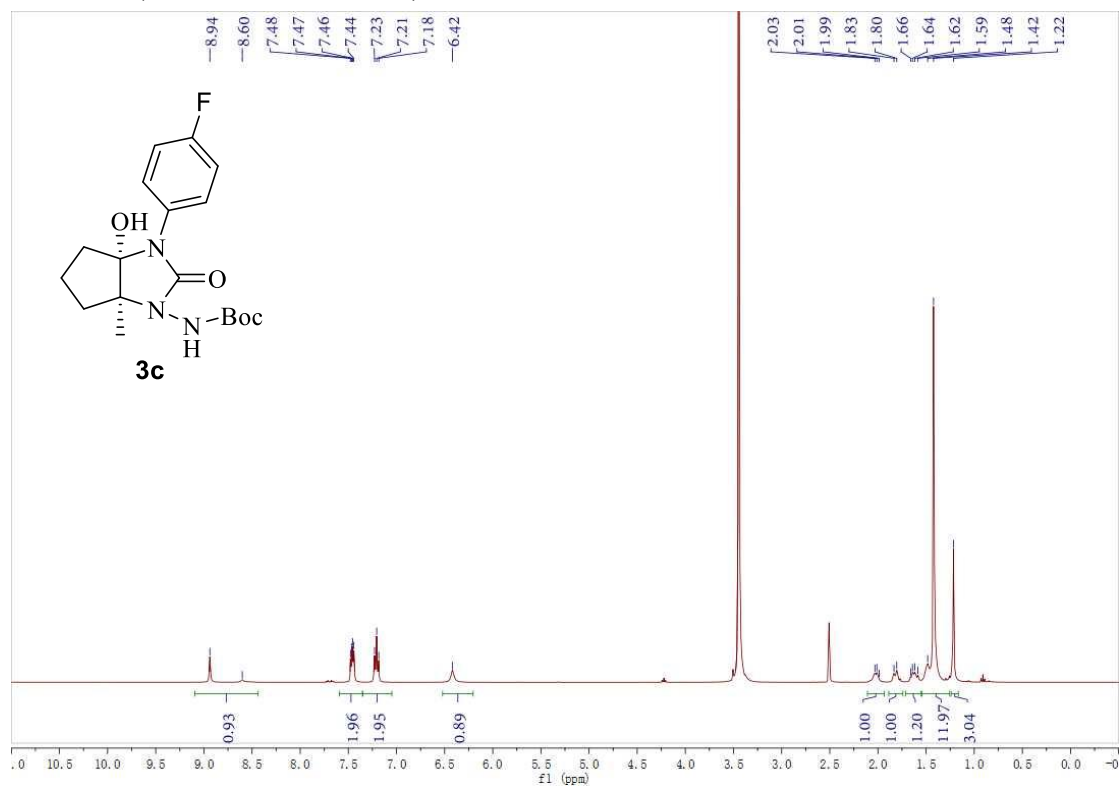

$^{13}\text{C}$  NMR (100 MHz,  $\text{DMSO-}d_6$ )

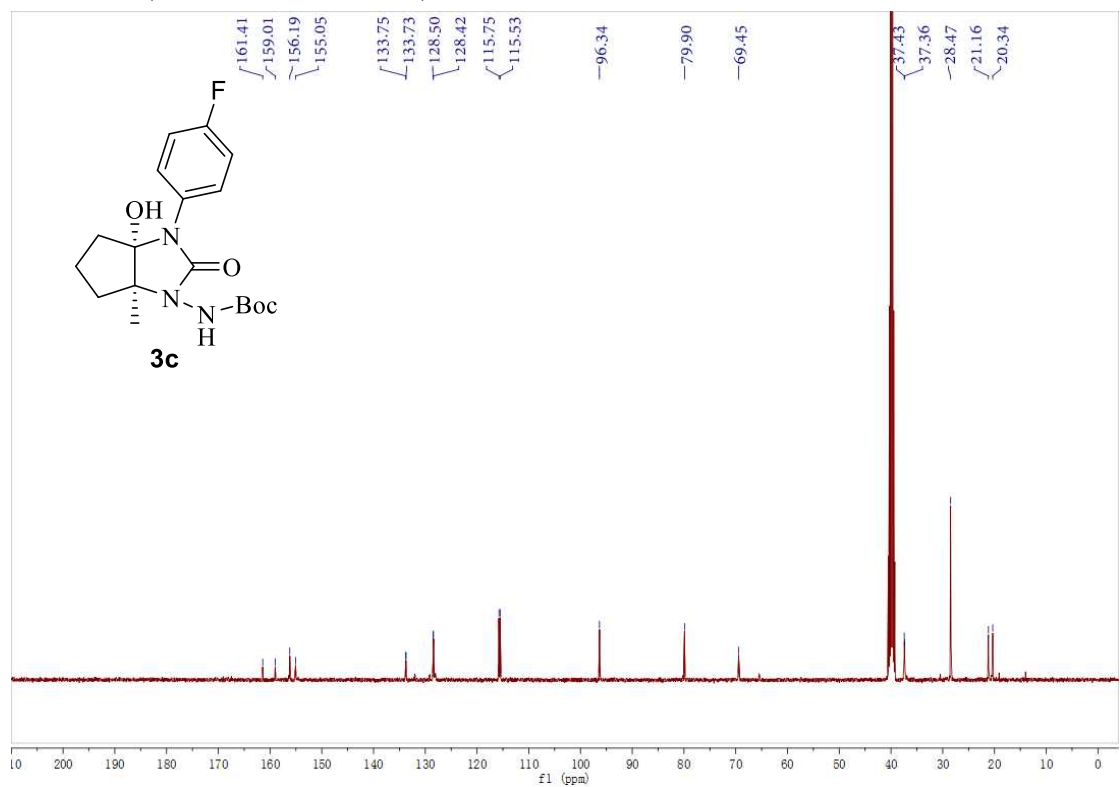

$^{19}\text{F}$  NMR (376 MHz,  $\text{DMSO-}d_6$ )

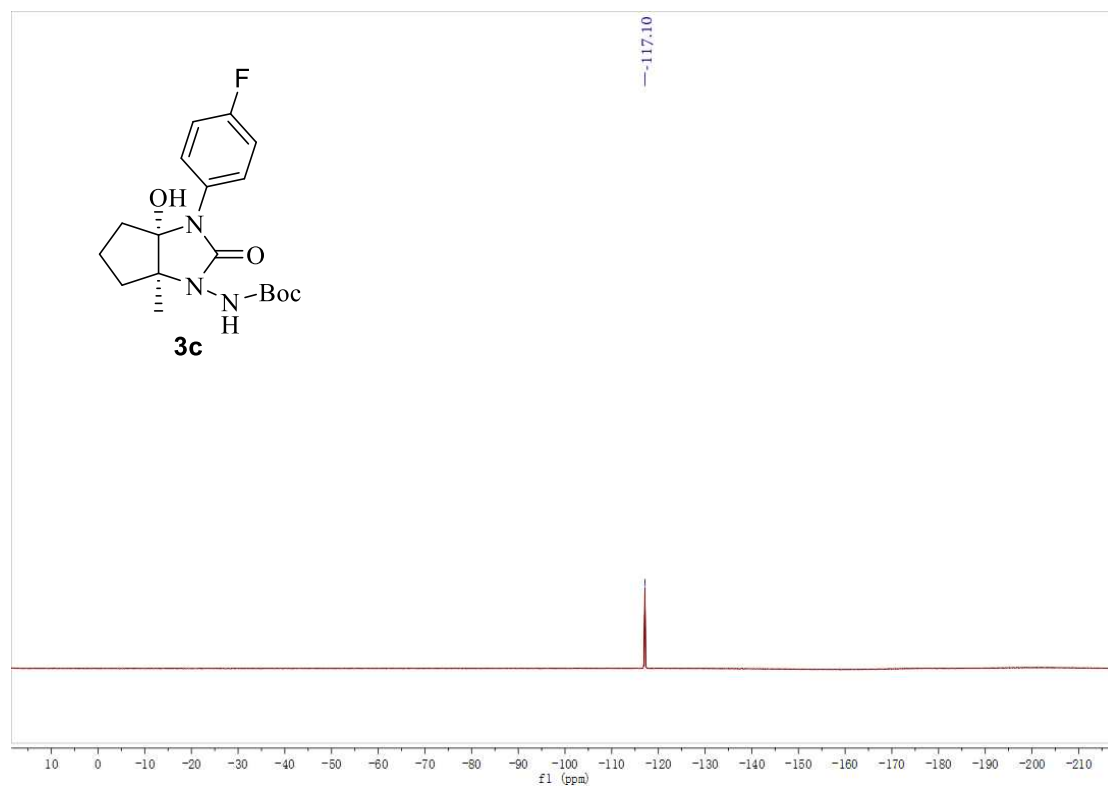

$^1\text{H}$  NMR (400 MHz,  $\text{DMSO-}d_6$ )

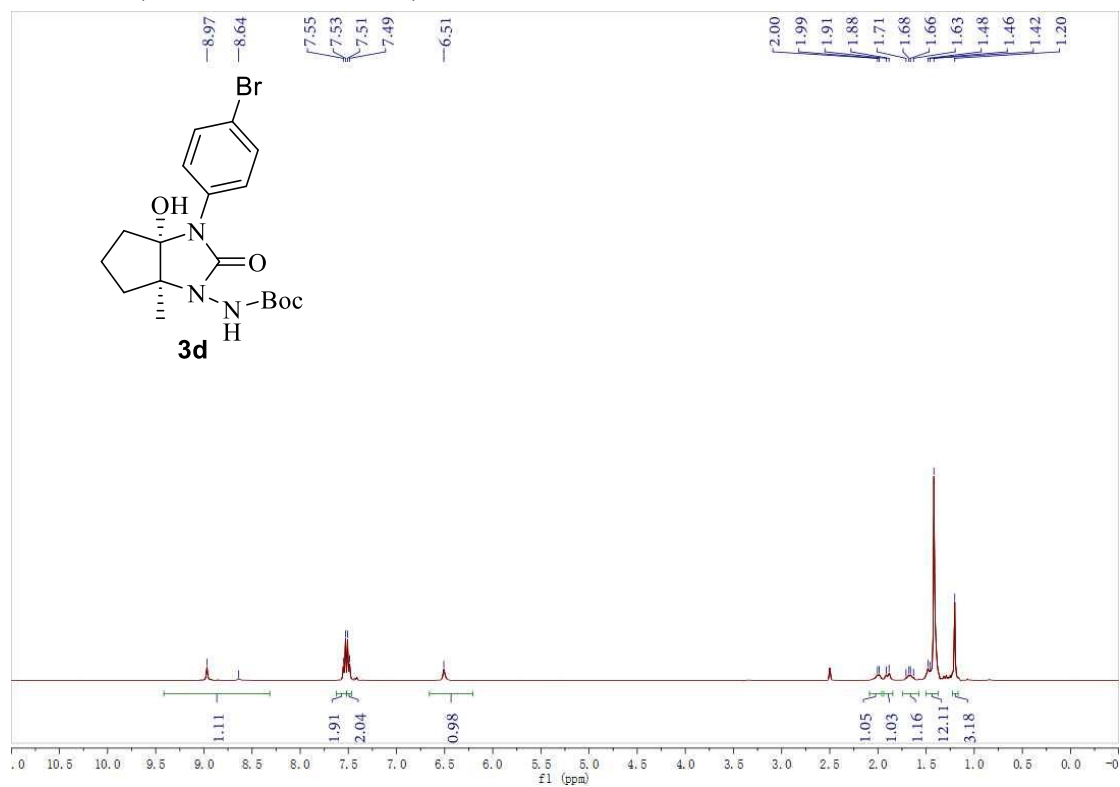

$^{13}\text{C}$  NMR (100 MHz,  $\text{DMSO-}d_6$ )

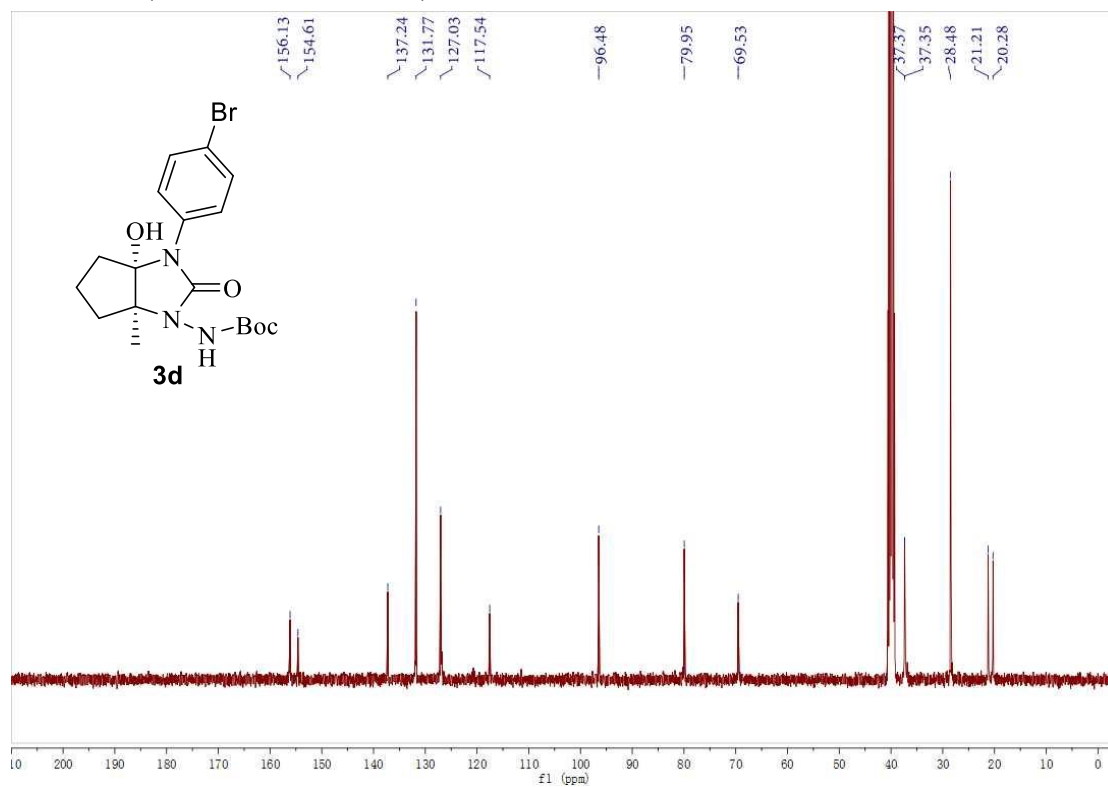

$^1\text{H}$  NMR (400 MHz,  $\text{DMSO-}d_6$ )

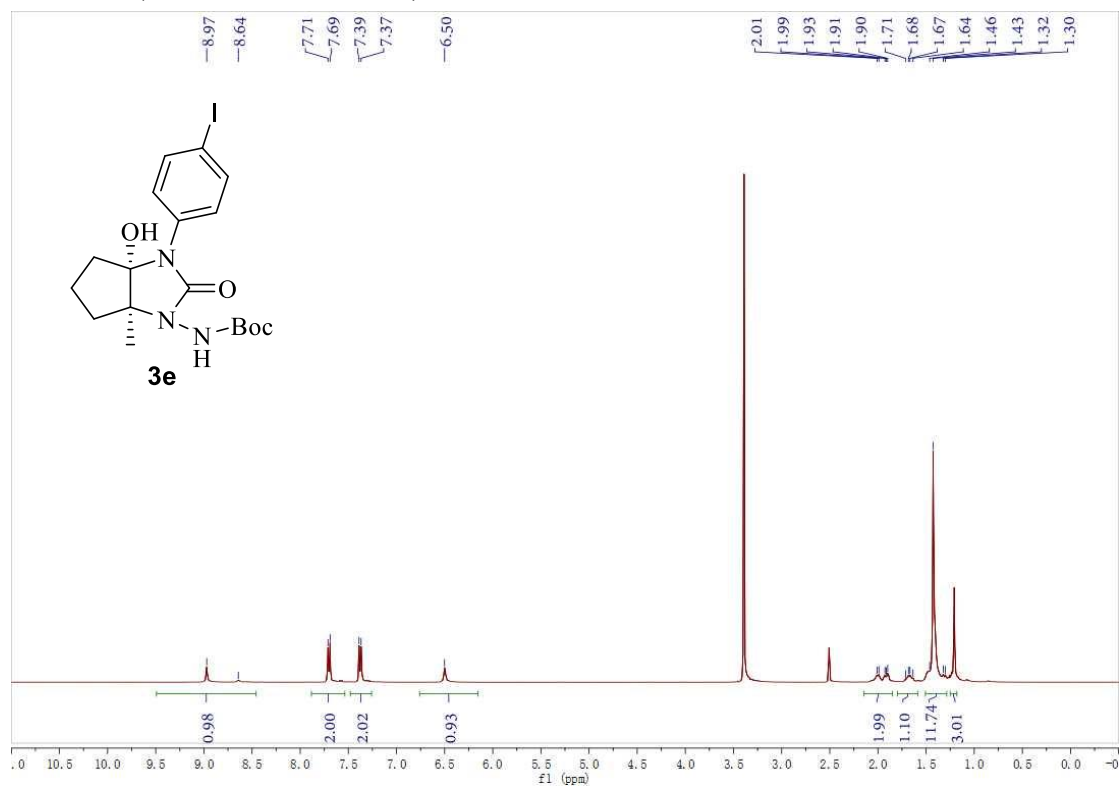

$^{13}\text{C}$  NMR (100 MHz,  $\text{DMSO-}d_6$ )

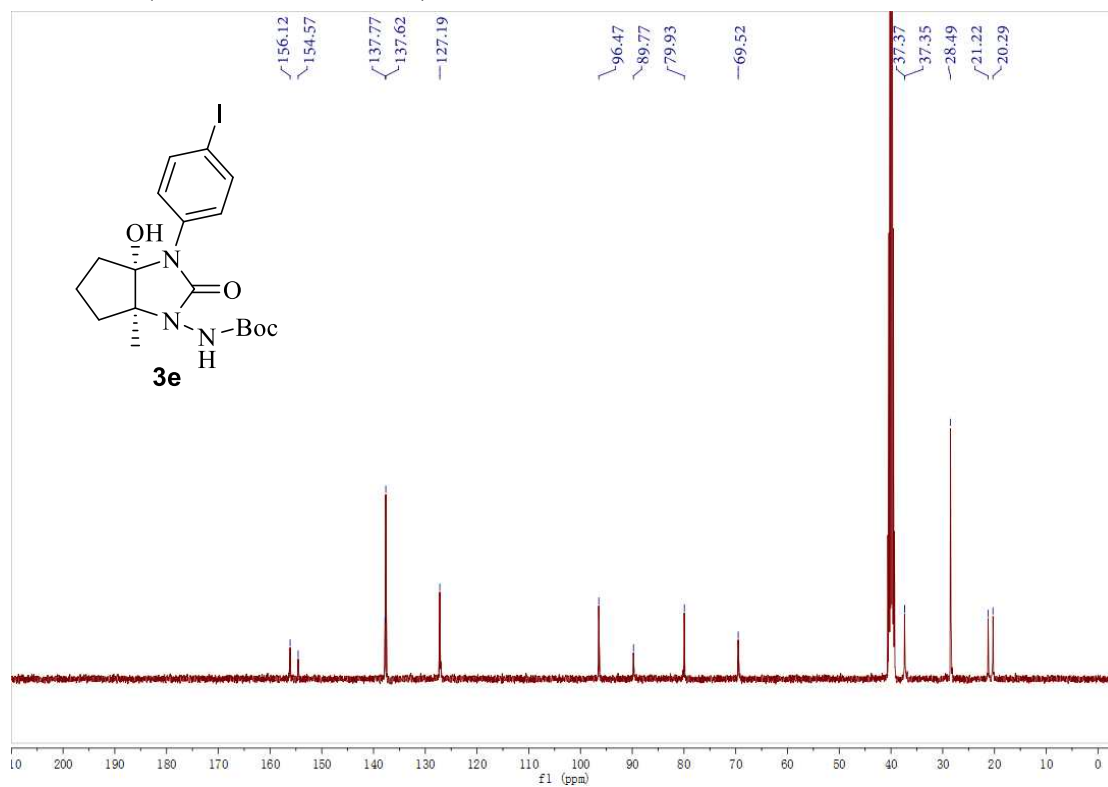

$^1\text{H}$  NMR (400 MHz,  $\text{DMSO-}d_6$ )

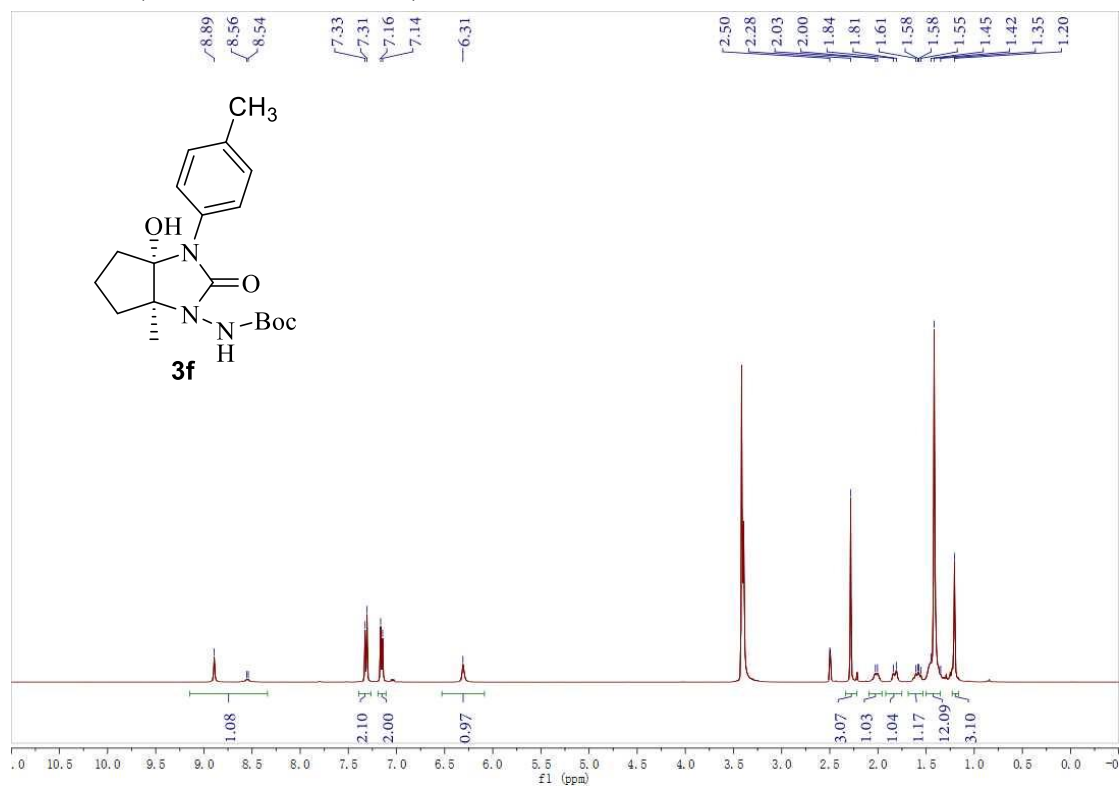

$^{13}\text{C}$  NMR (100 MHz,  $\text{DMSO-}d_6$ )

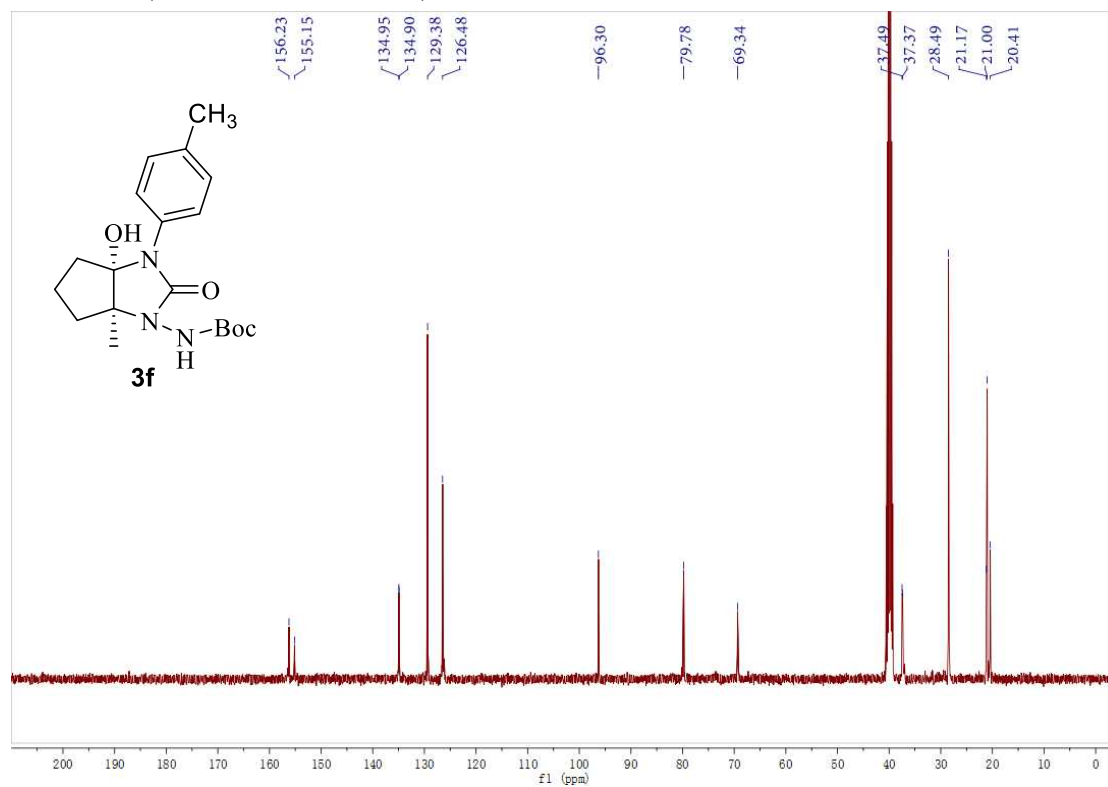

$^1\text{H}$  NMR (400 MHz,  $\text{DMSO-}d_6$ )

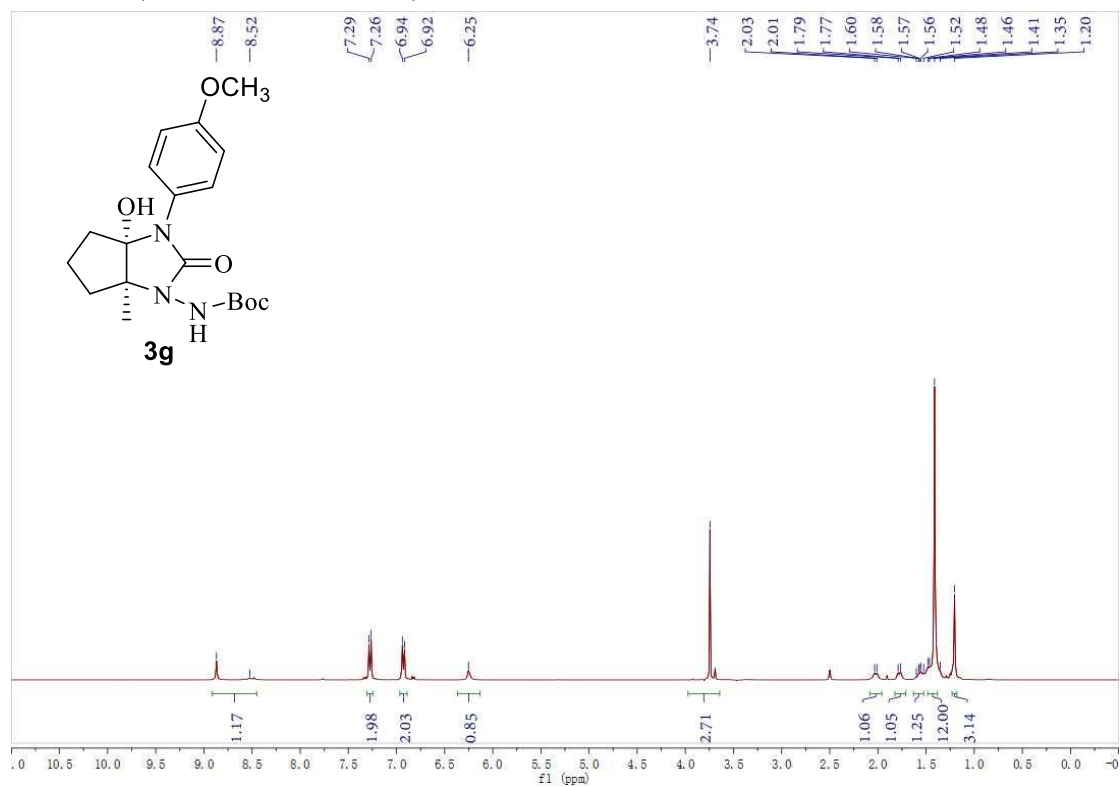

$^{13}\text{C}$  NMR (100 MHz,  $\text{DMSO-}d_6$ )

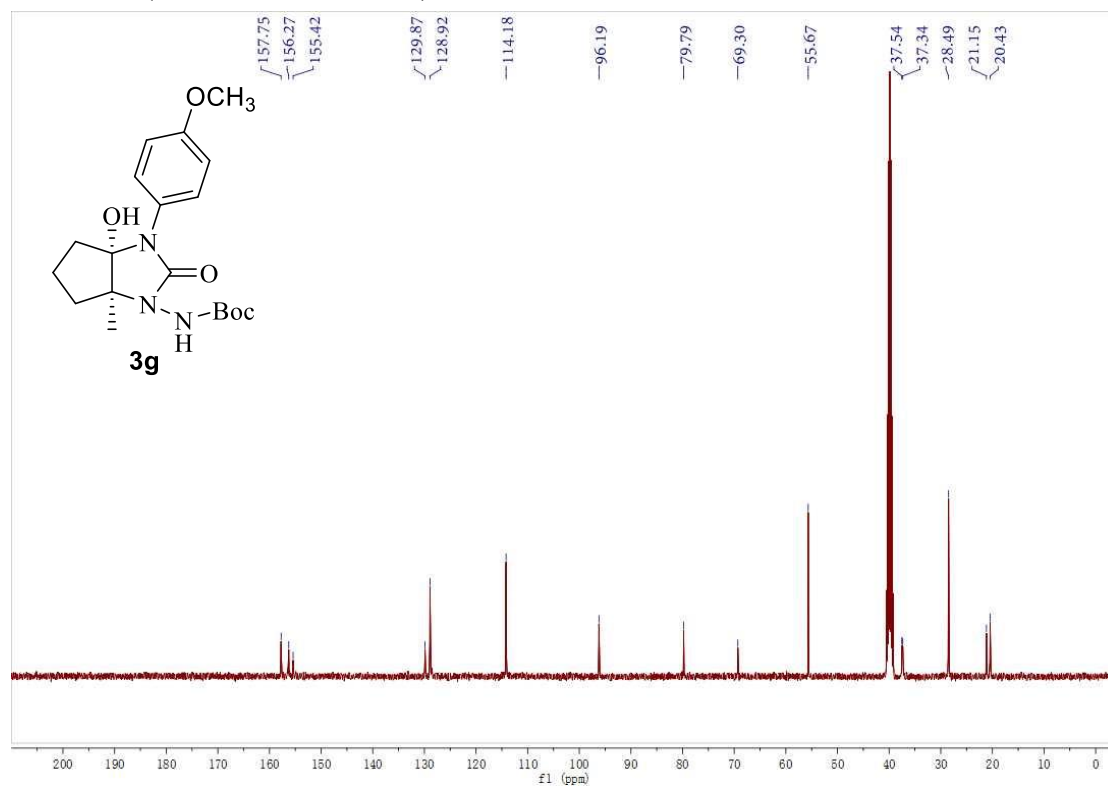

$^1\text{H}$  NMR (400 MHz,  $\text{DMSO-}d_6$ )

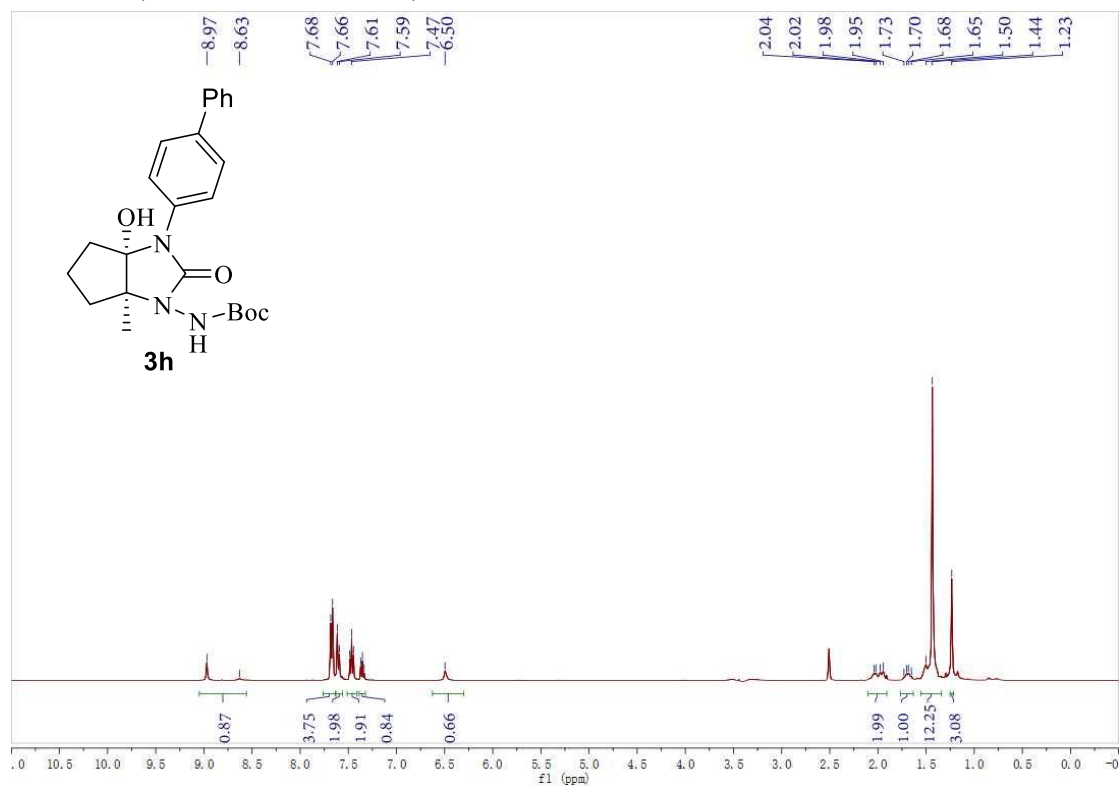



$^{13}\text{C}$  NMR (100 MHz,  $\text{DMSO-}d_6$ )

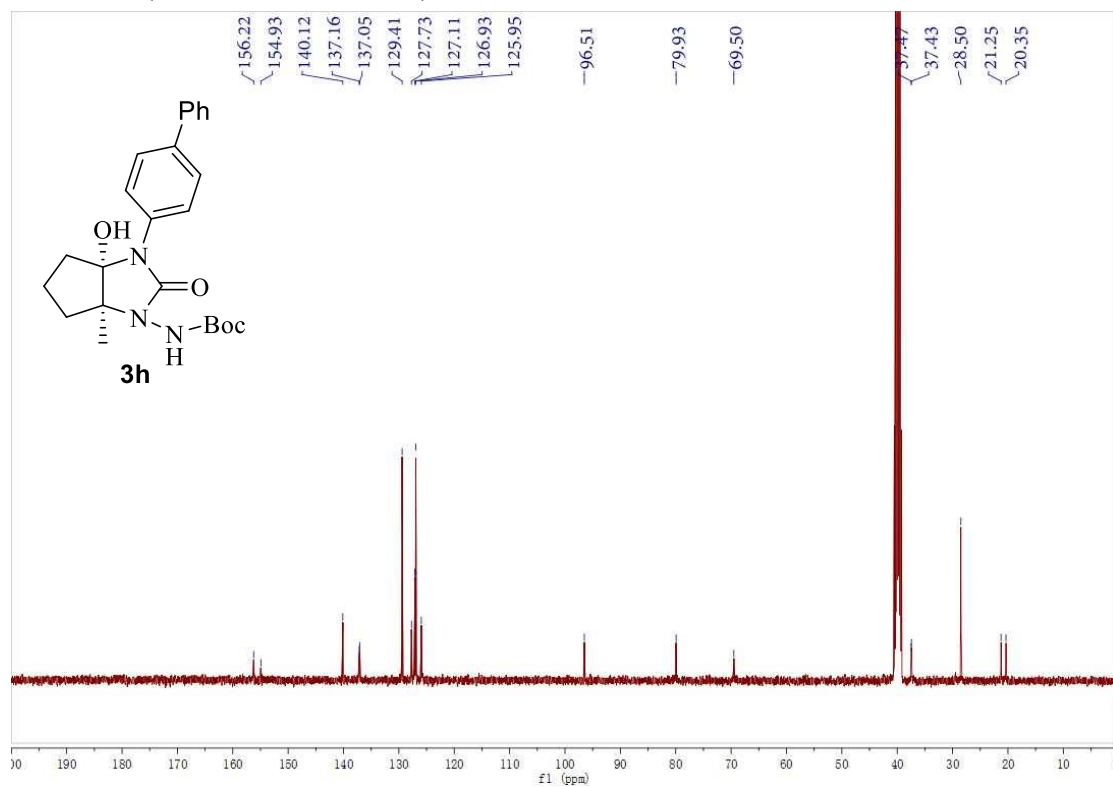

$^1\text{H}$  NMR (400 MHz,  $\text{DMSO-}d_6$ )

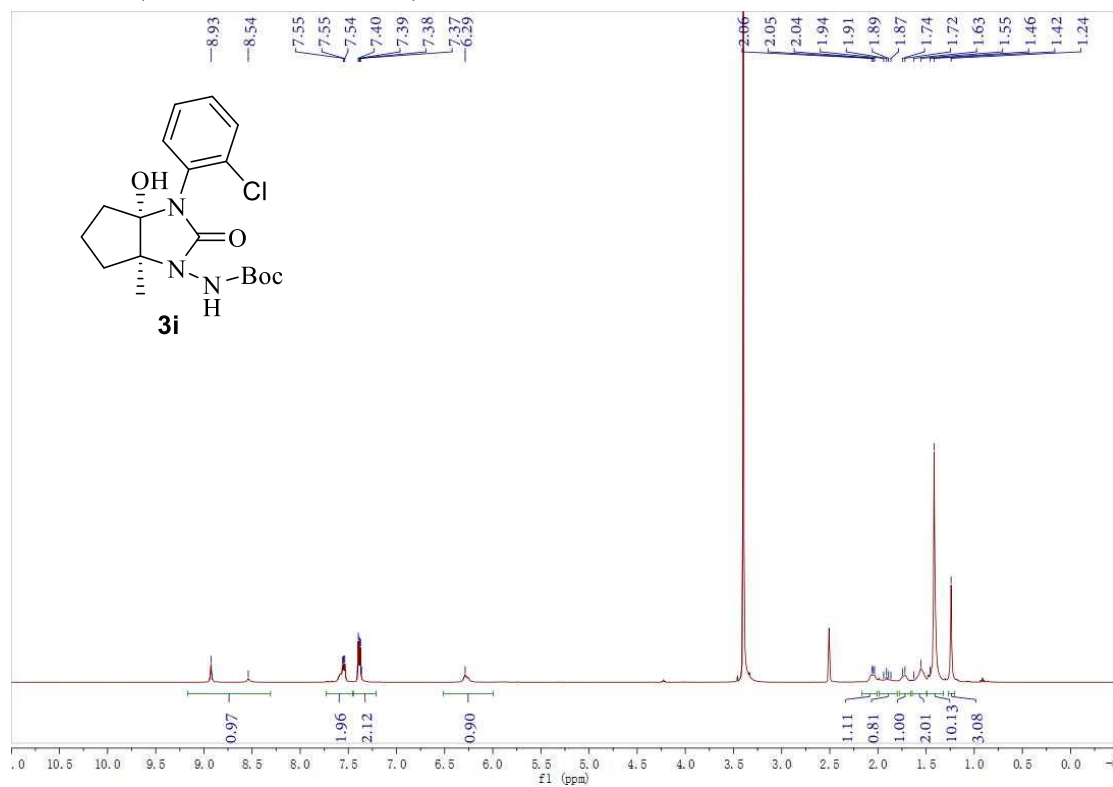

$^{13}\text{C}$  NMR (100 MHz,  $\text{DMSO-}d_6$ )

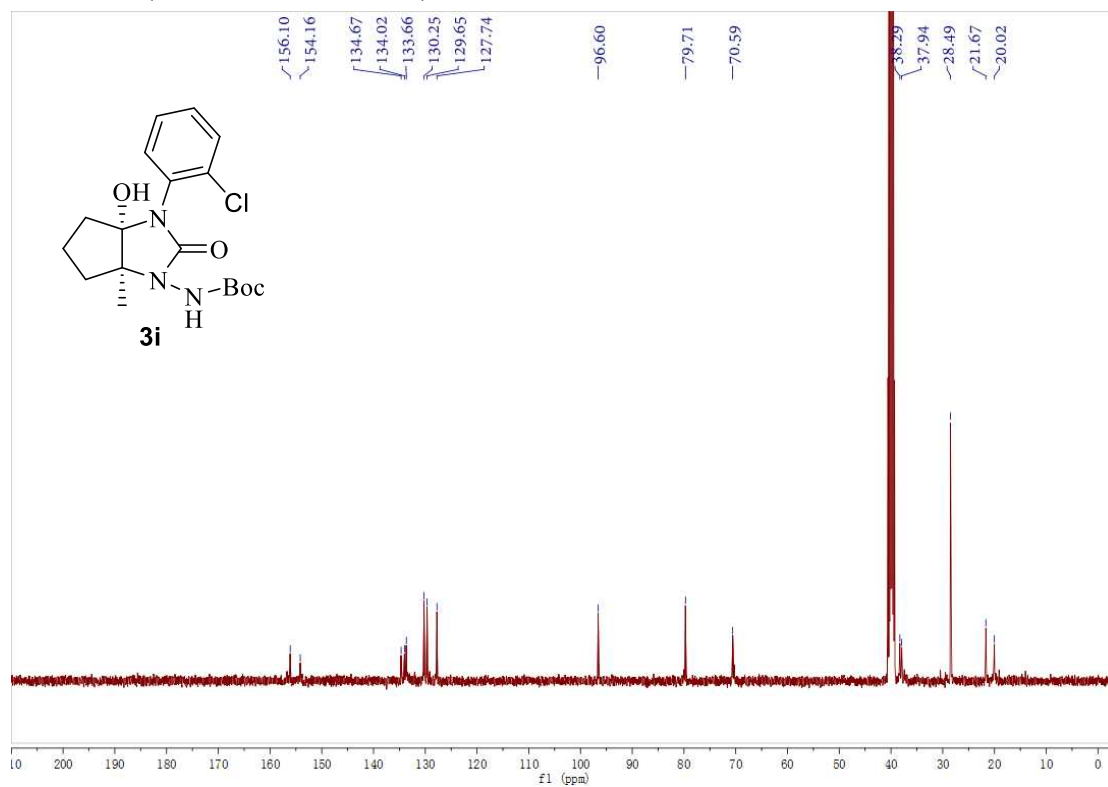

$^1\text{H}$  NMR (400 MHz,  $\text{DMSO-}d_6$ )

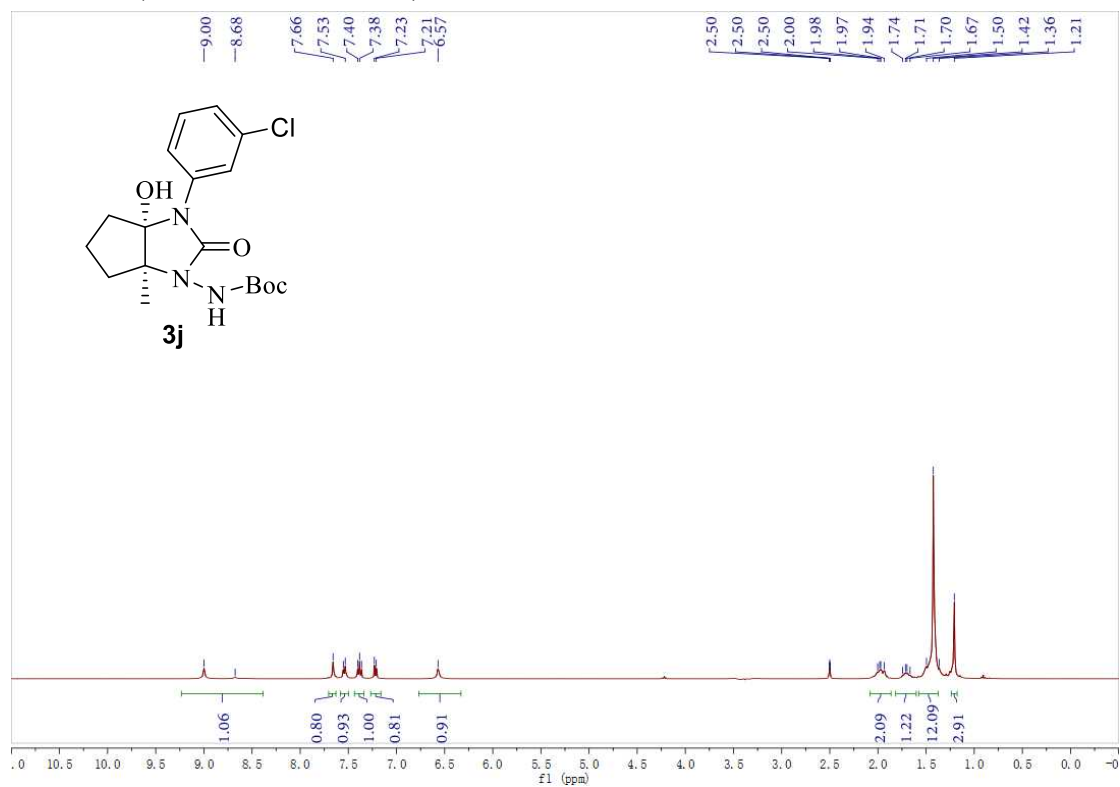

$^{13}\text{C}$  NMR (100 MHz,  $\text{DMSO-}d_6$ )

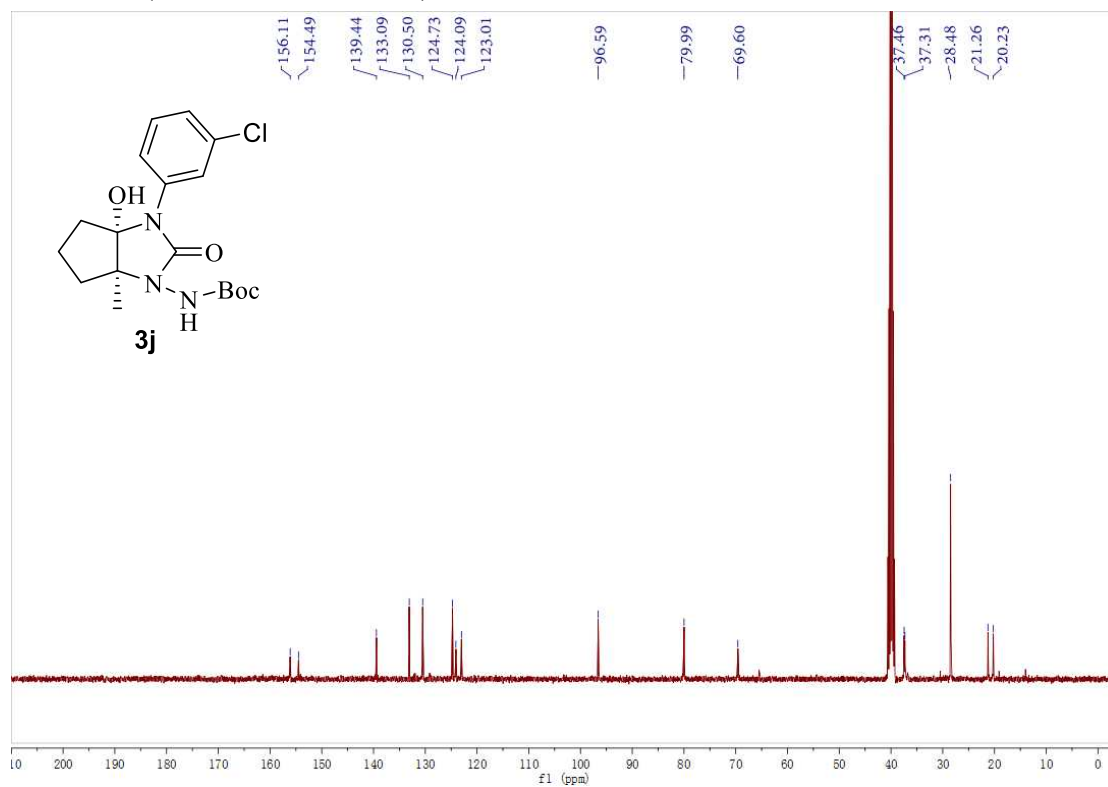

$^1\text{H}$  NMR (400 MHz,  $\text{DMSO-}d_6$ )

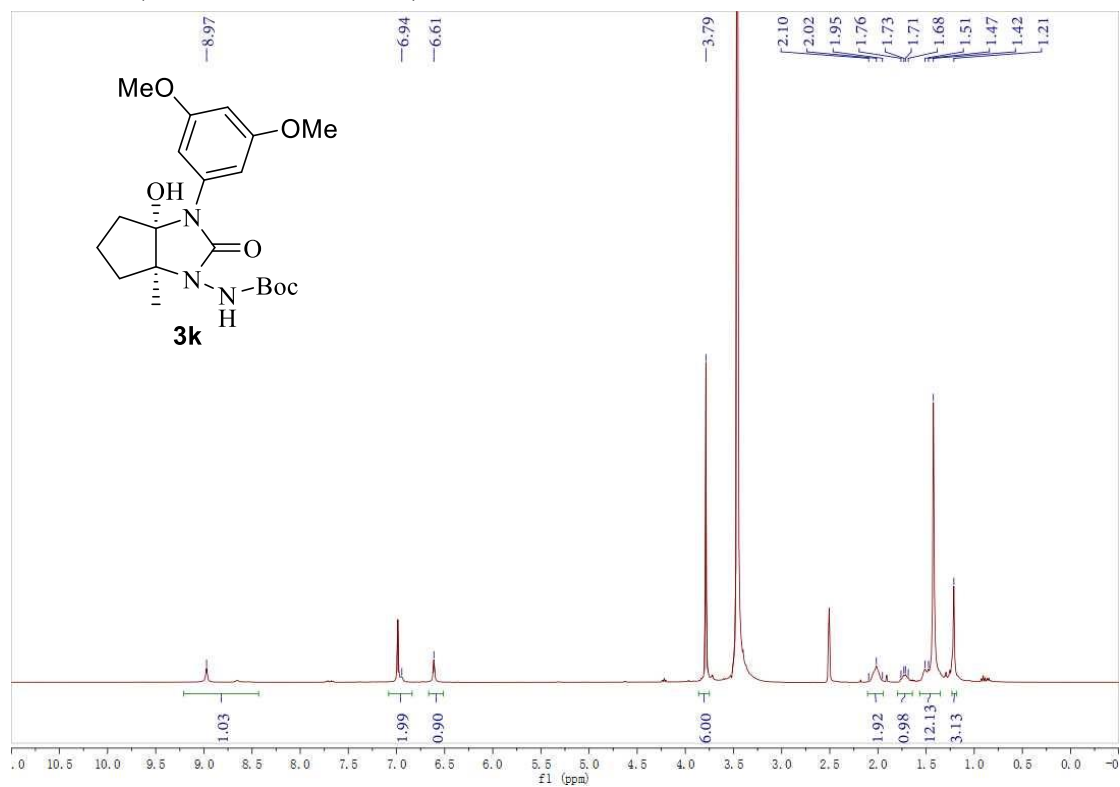

$^{13}\text{C}$  NMR (100 MHz,  $\text{DMSO-}d_6$ )

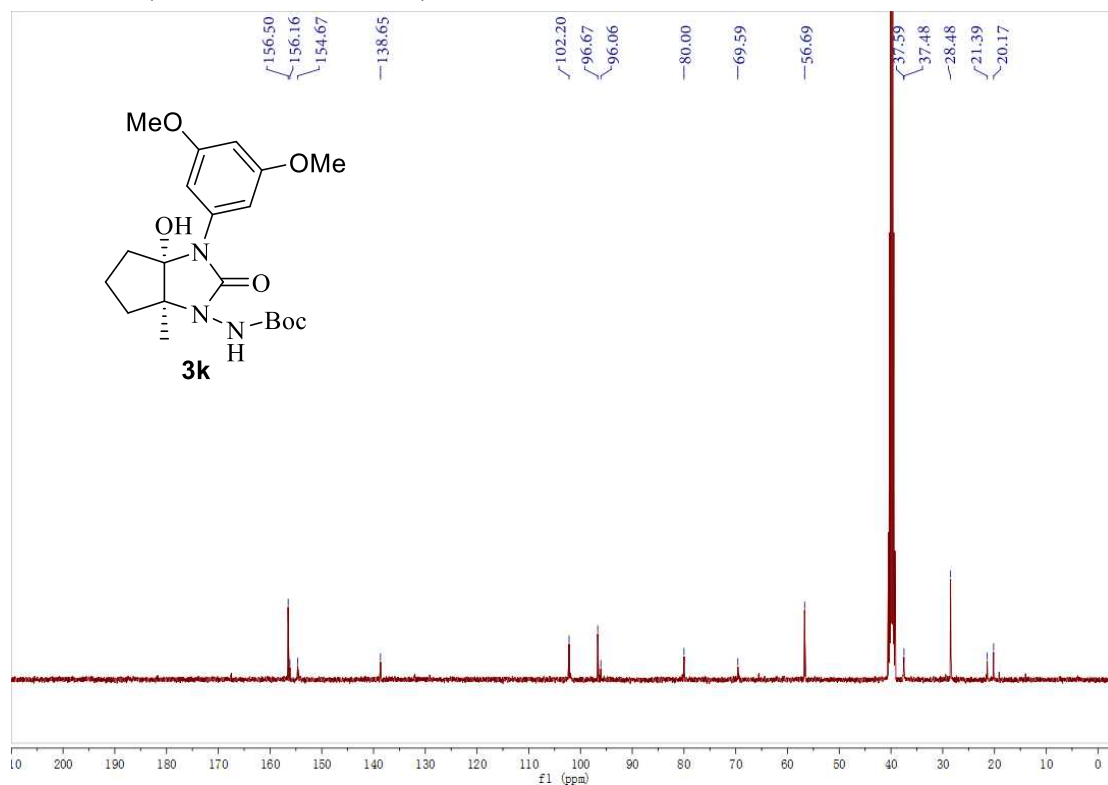

$^1\text{H}$  NMR (400 MHz,  $\text{DMSO-}d_6$ )

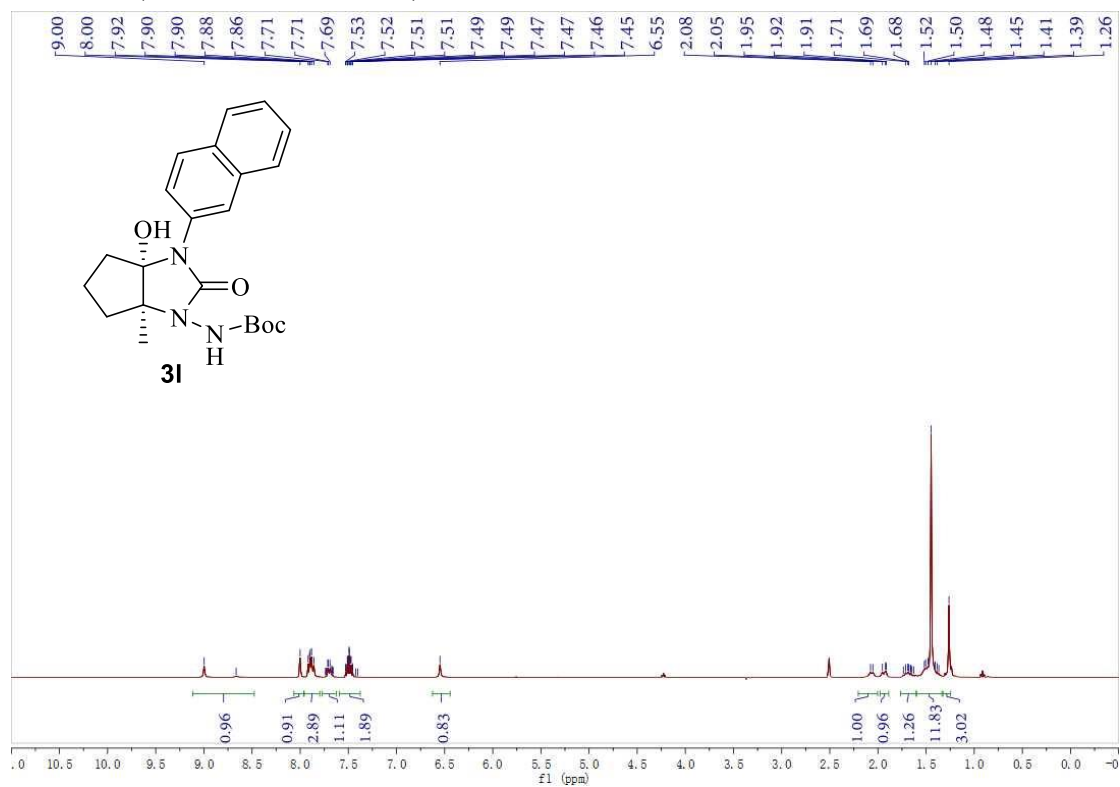

$^{13}\text{C}$  NMR (100 MHz,  $\text{DMSO-}d_6$ )

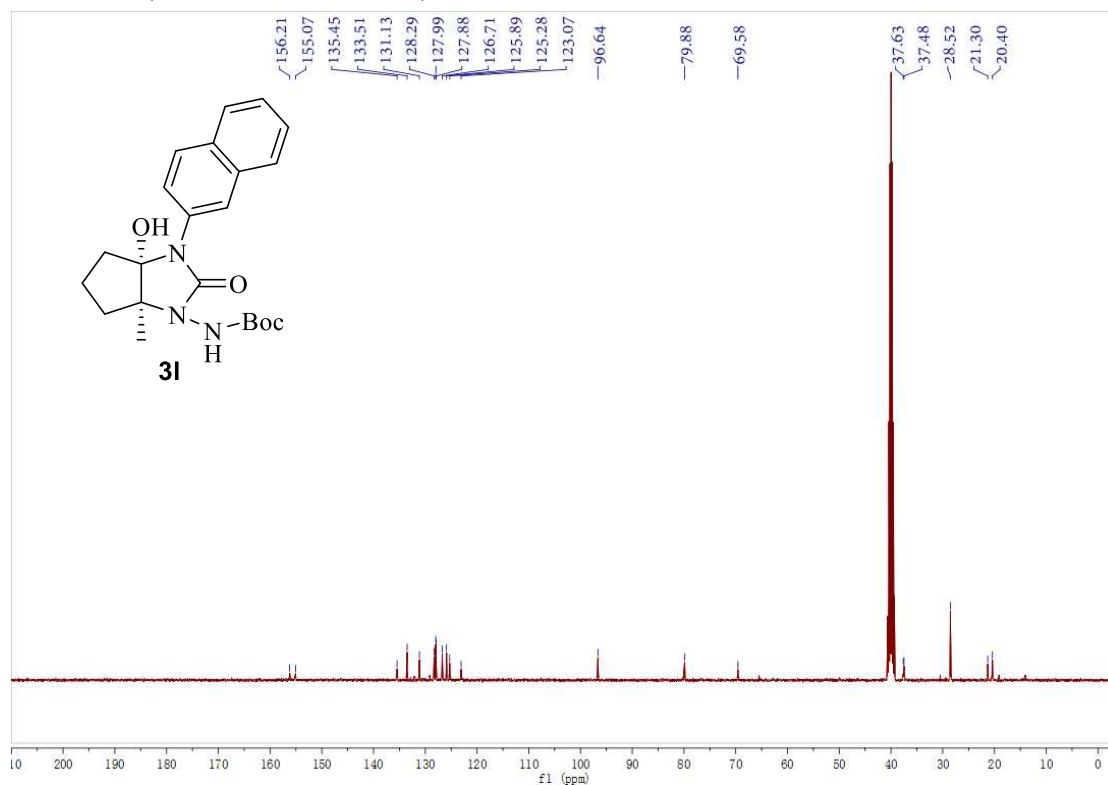

$^1\text{H}$  NMR (400 MHz,  $\text{DMSO-}d_6$ )

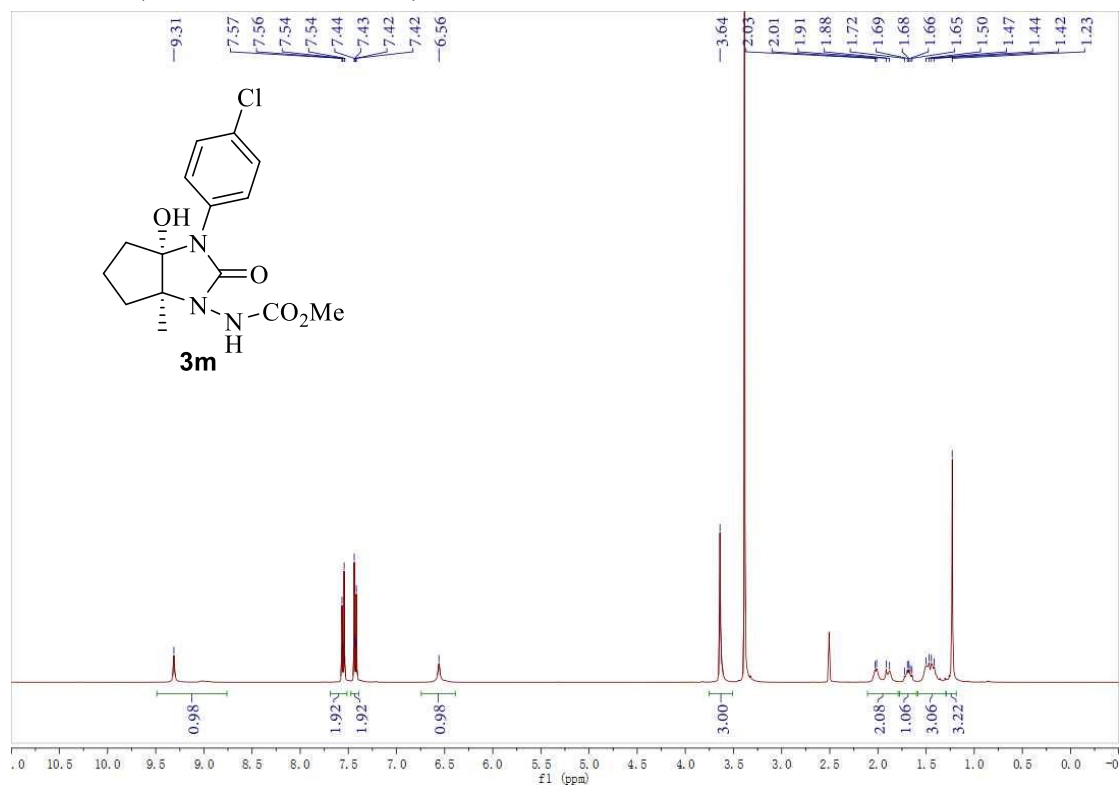

$^{13}\text{C}$  NMR (100 MHz,  $\text{DMSO-}d_6$ )

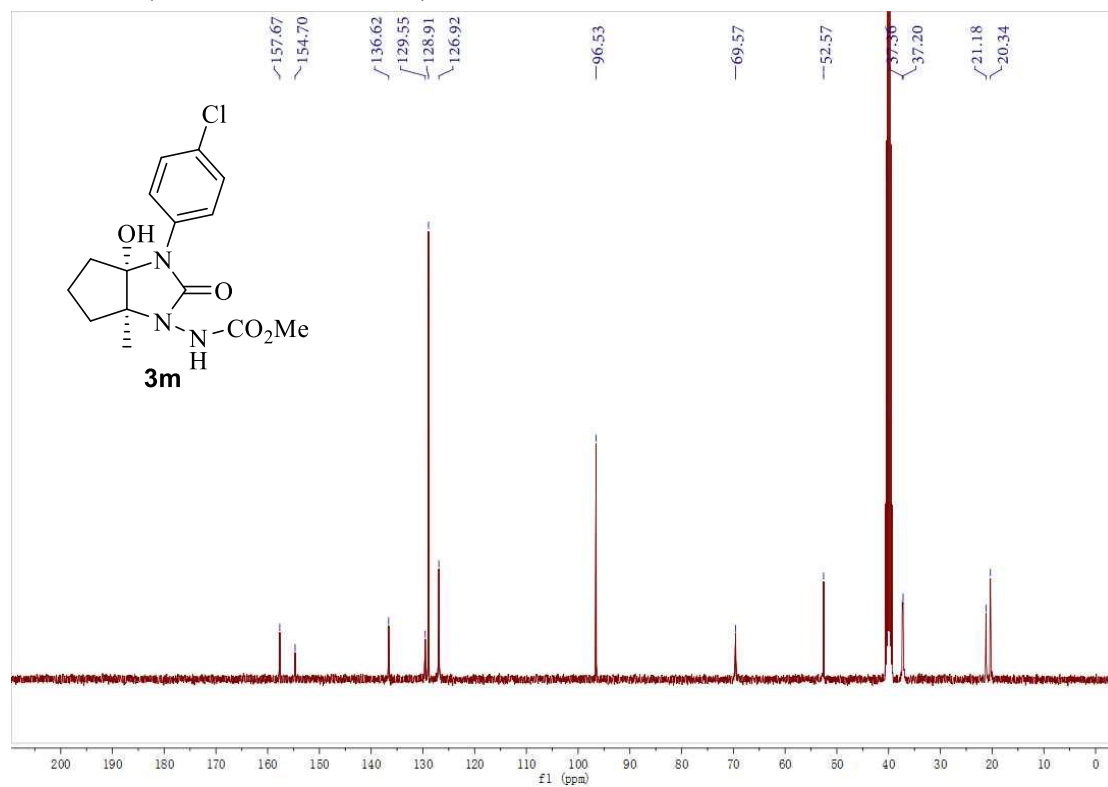

$^1\text{H}$  NMR (400 MHz,  $\text{DMSO-}d_6$ )

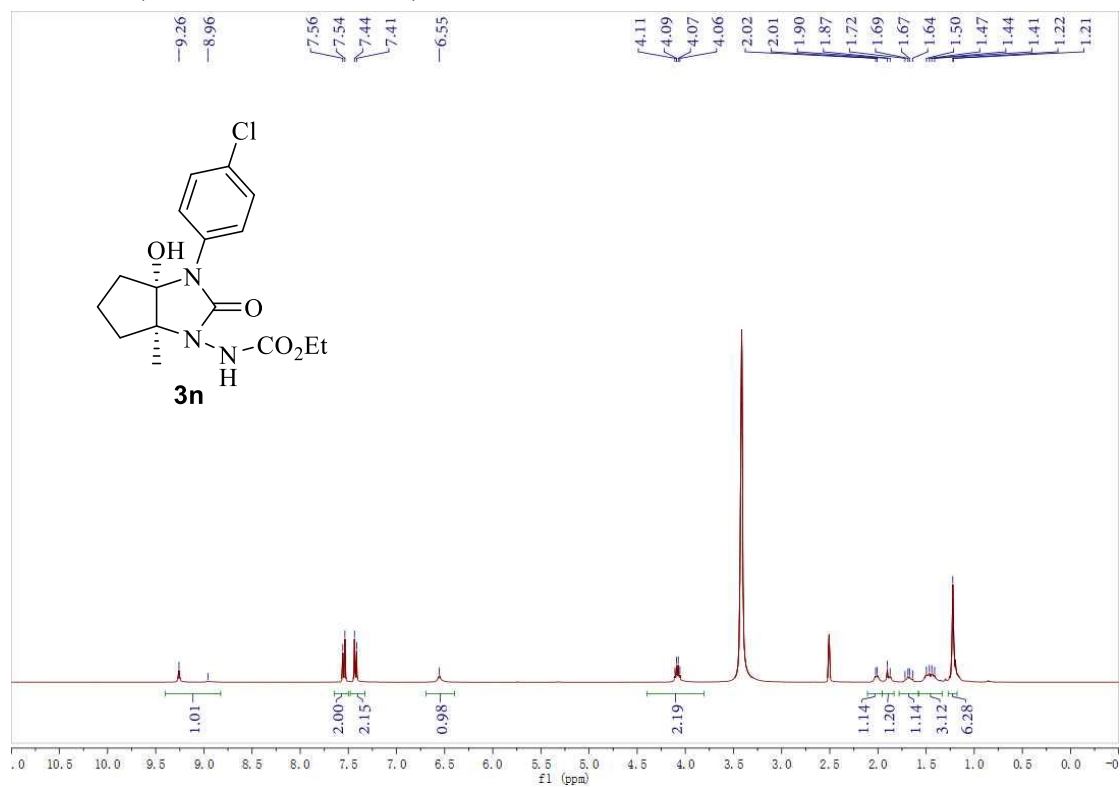

$^{13}\text{C}$  NMR (100 MHz,  $\text{DMSO-}d_6$ )

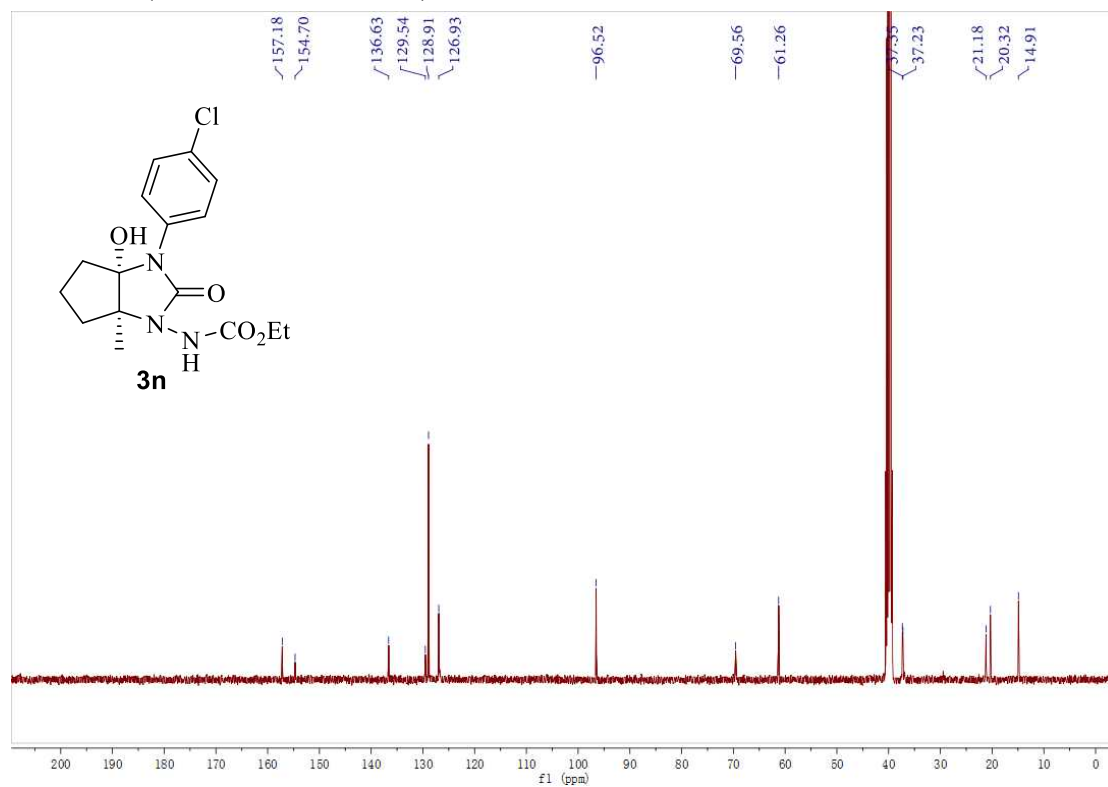

$^1\text{H}$  NMR (400 MHz,  $\text{DMSO-}d_6$ )

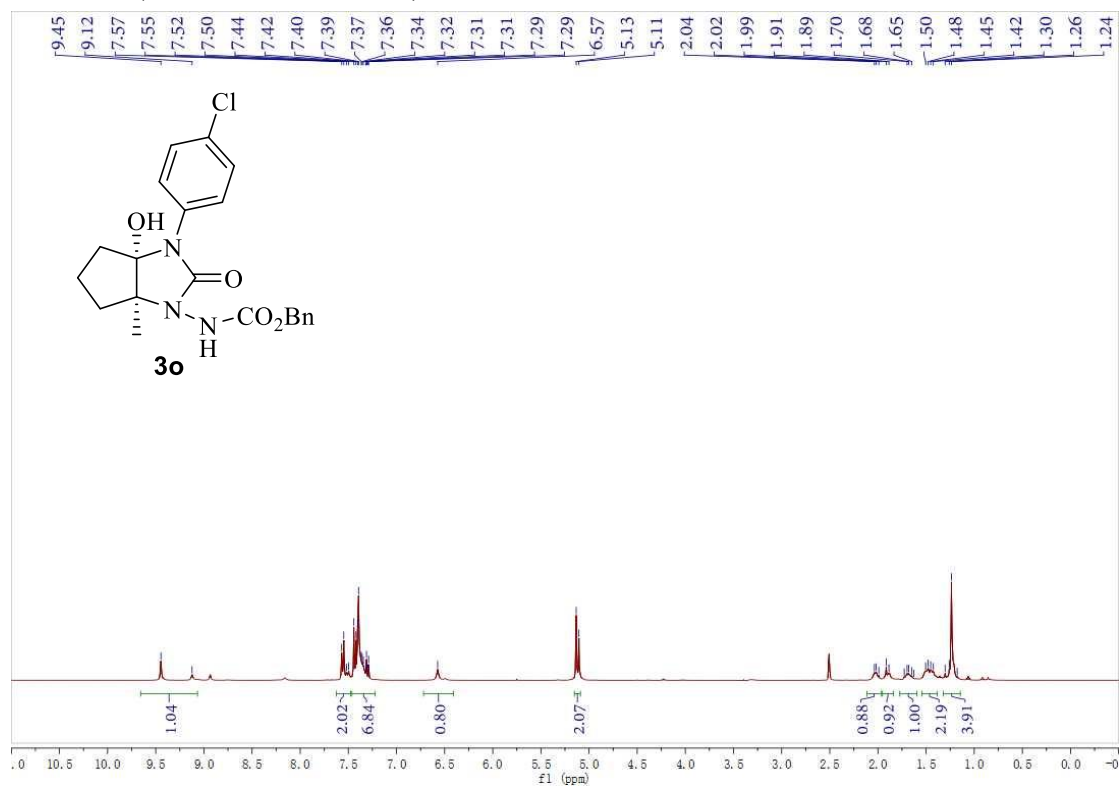

$^{13}\text{C}$  NMR (100 MHz,  $\text{DMSO-}d_6$ )

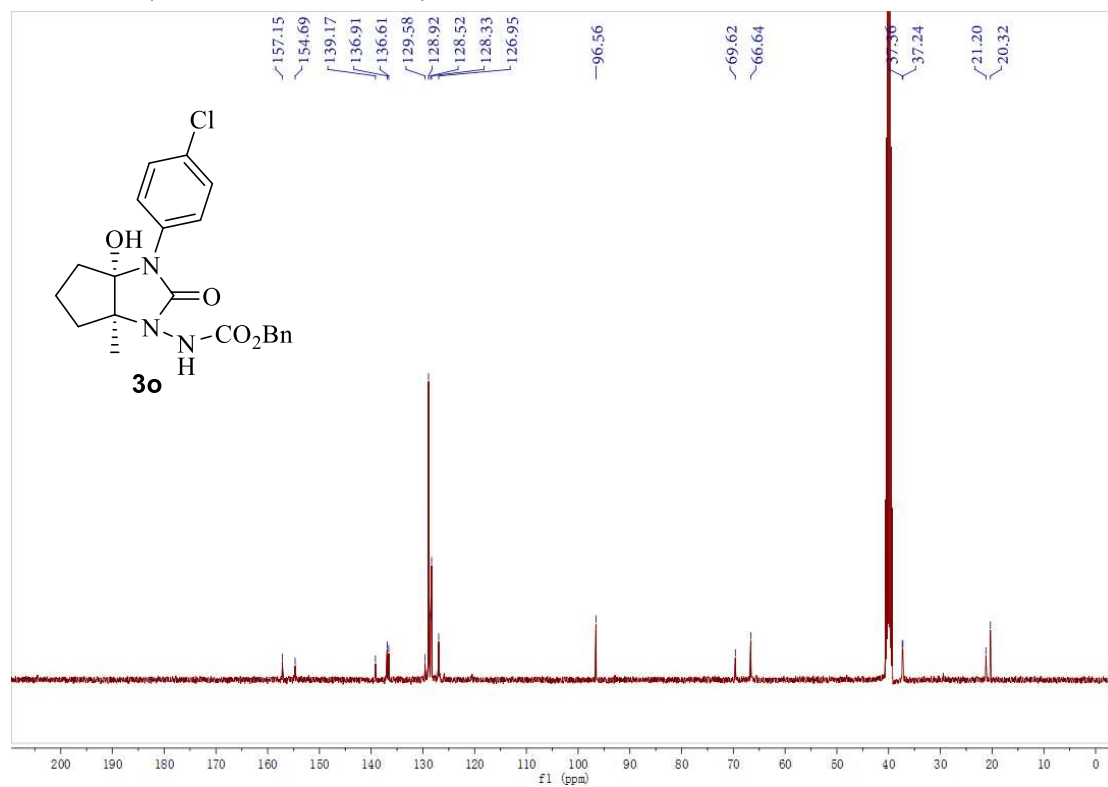

$^1\text{H}$  NMR (400 MHz,  $\text{DMSO-}d_6$ )

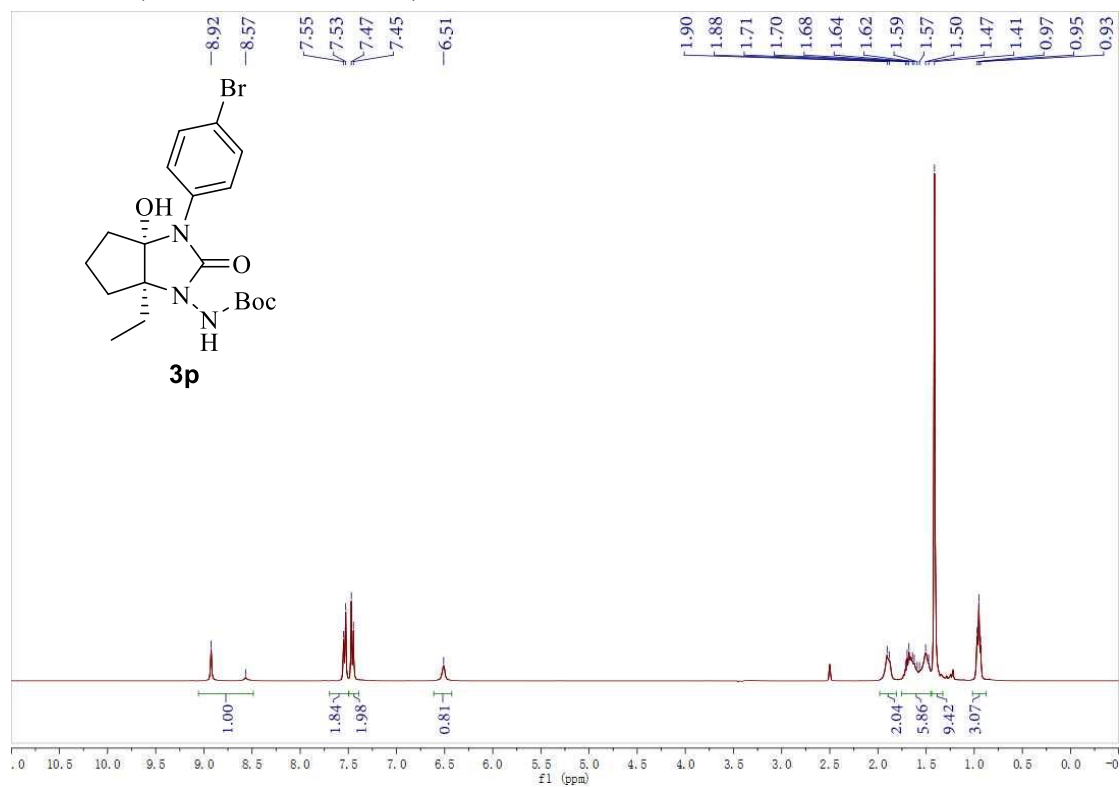





$^{13}\text{C}$  NMR (100 MHz,  $\text{DMSO-}d_6$ )

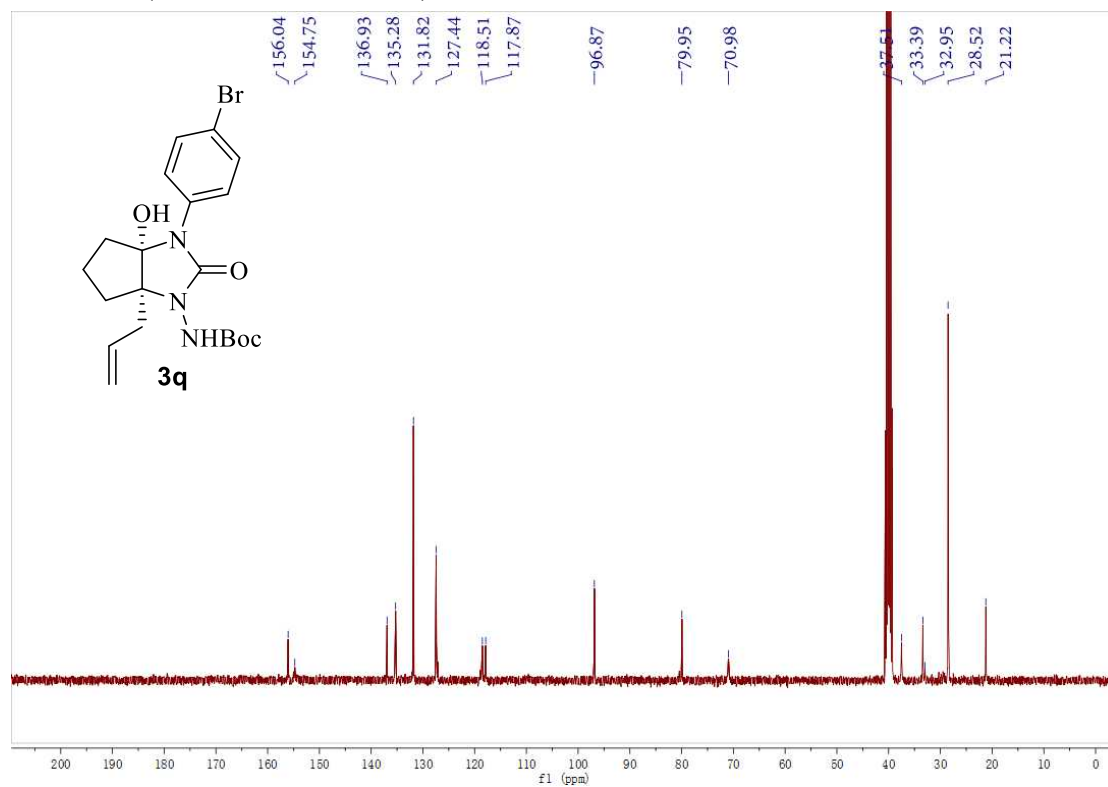

$^1\text{H}$  NMR (400 MHz,  $\text{DMSO-}d_6$ )

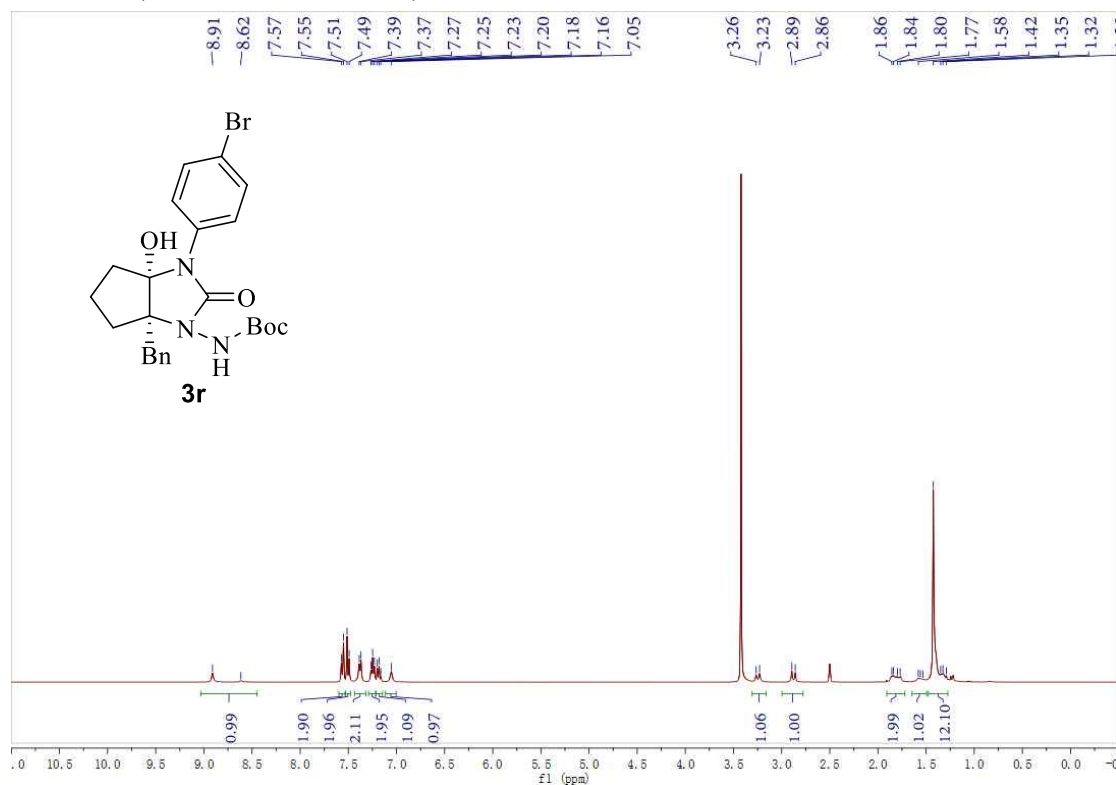

$^{13}\text{C}$  NMR (100 MHz,  $\text{DMSO-}d_6$ )

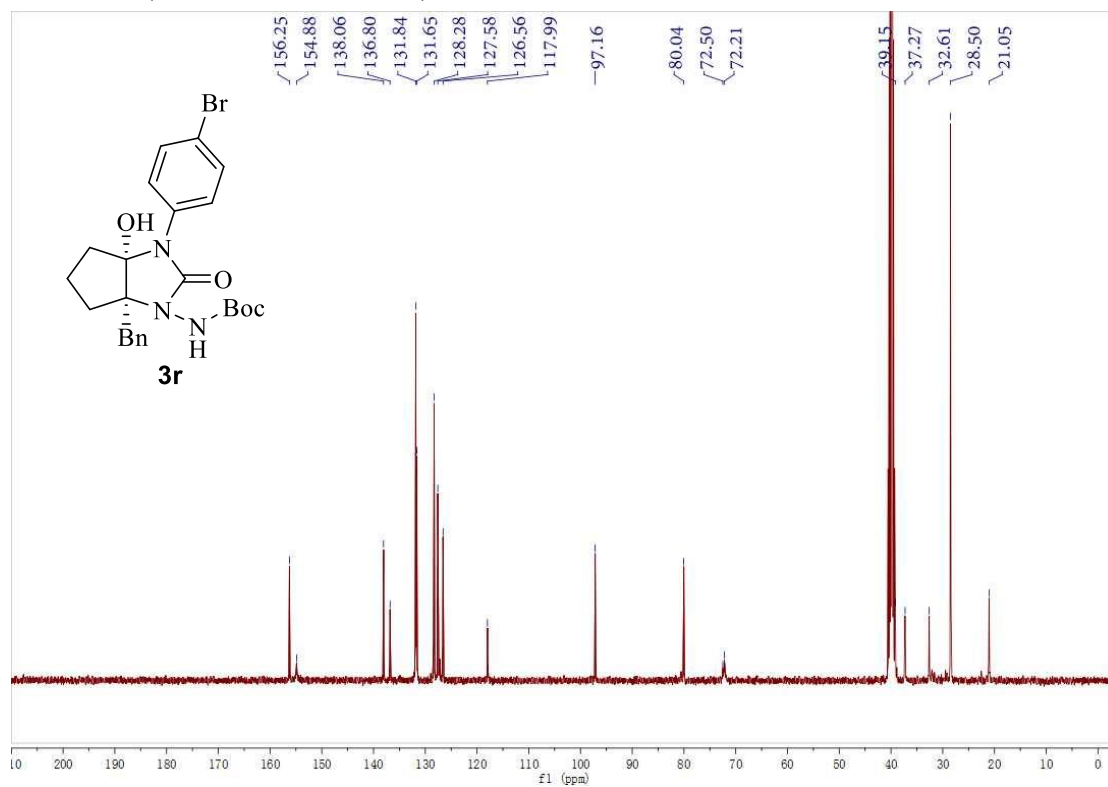

$^1\text{H}$  NMR (400 MHz,  $\text{DMSO-}d_6$ )

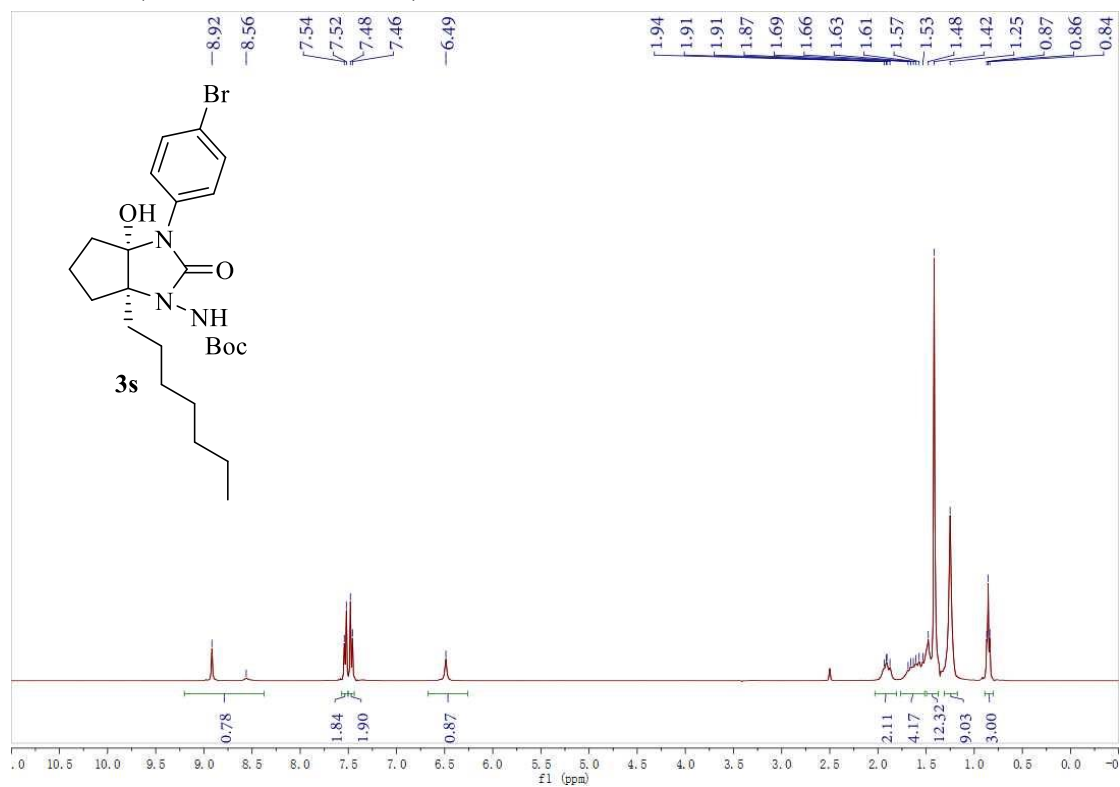

$^{13}\text{C}$  NMR (100 MHz,  $\text{DMSO-}d_6$ )

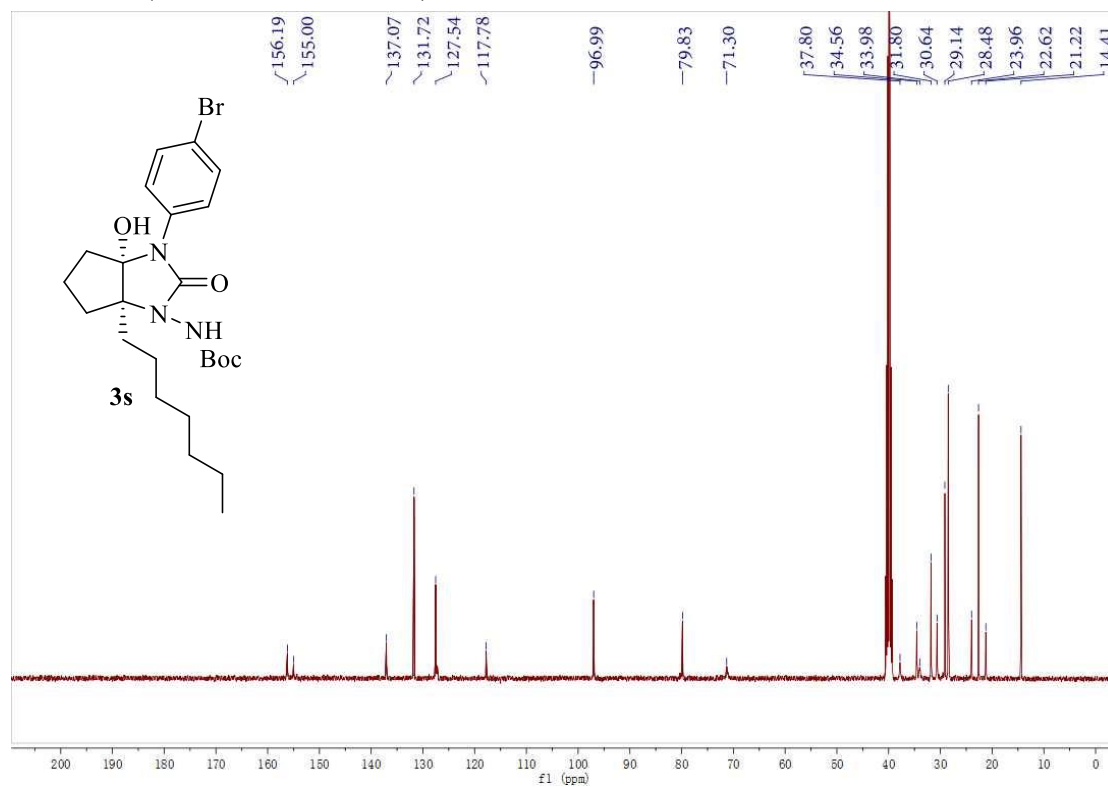

$^1\text{H}$  NMR (400 MHz,  $\text{DMSO-}d_6$ )

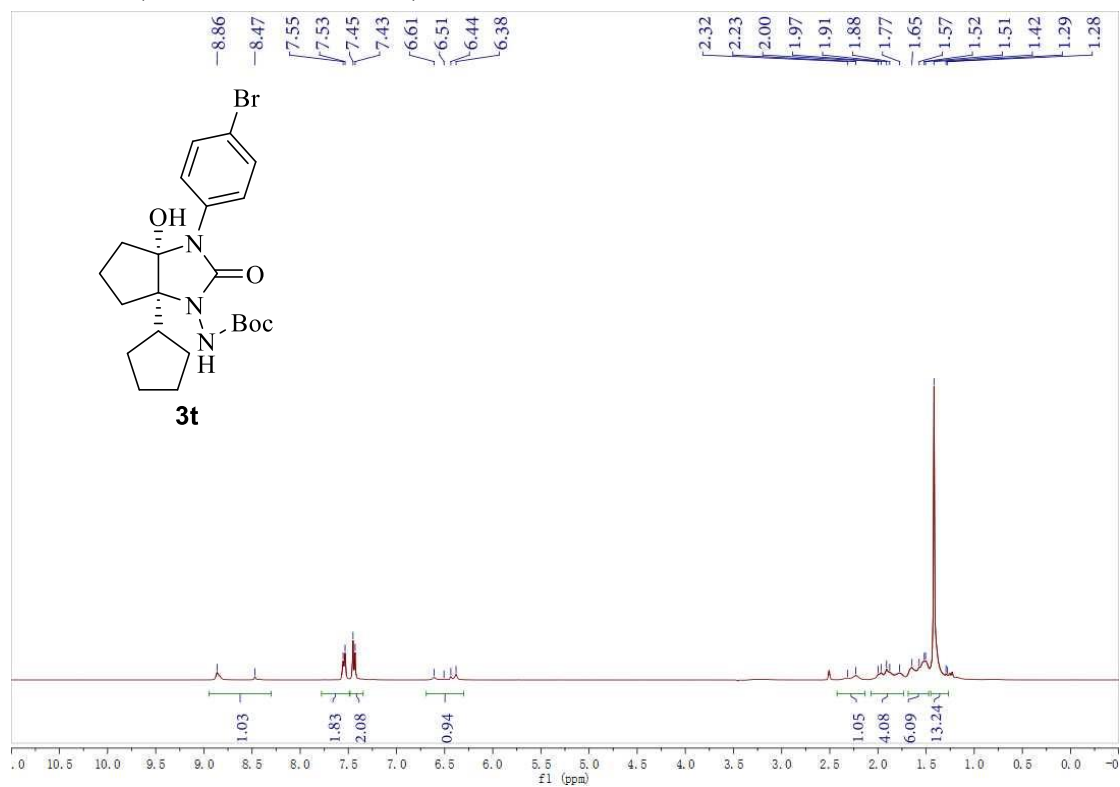

$^{13}\text{C}$  NMR (100 MHz,  $\text{DMSO-}d_6$ )

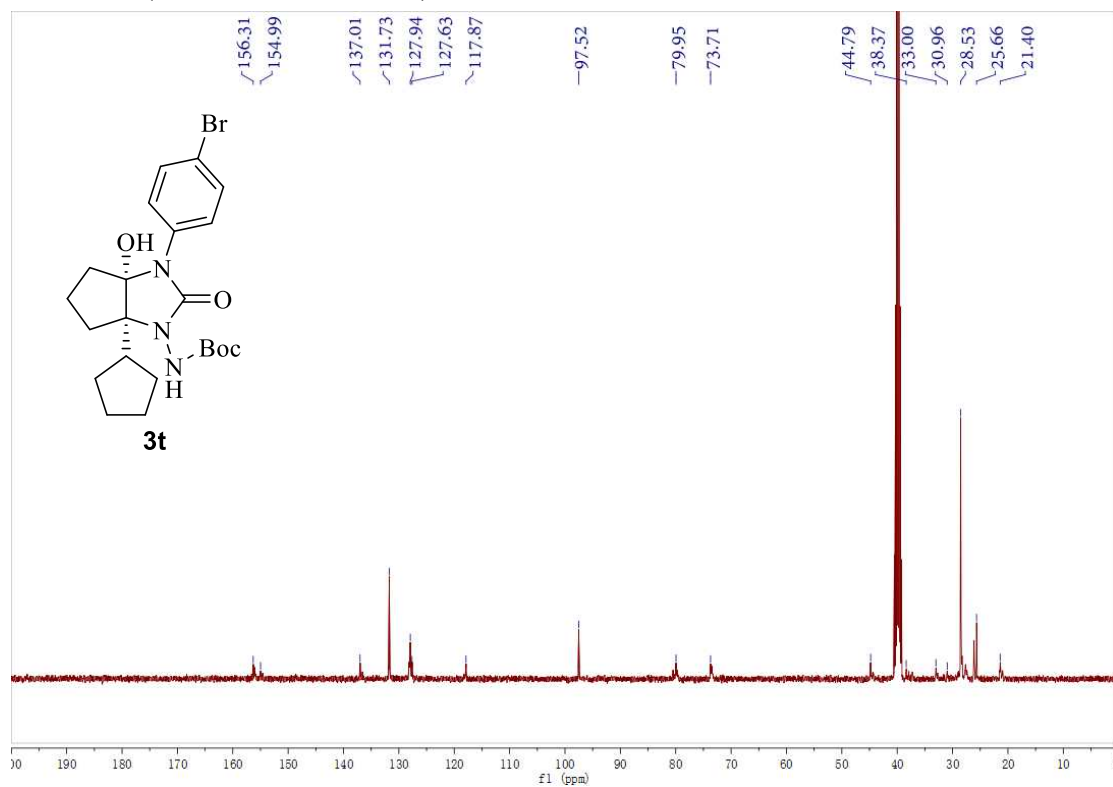

$^1\text{H}$  NMR (400 MHz,  $\text{CDCl}_3$ )

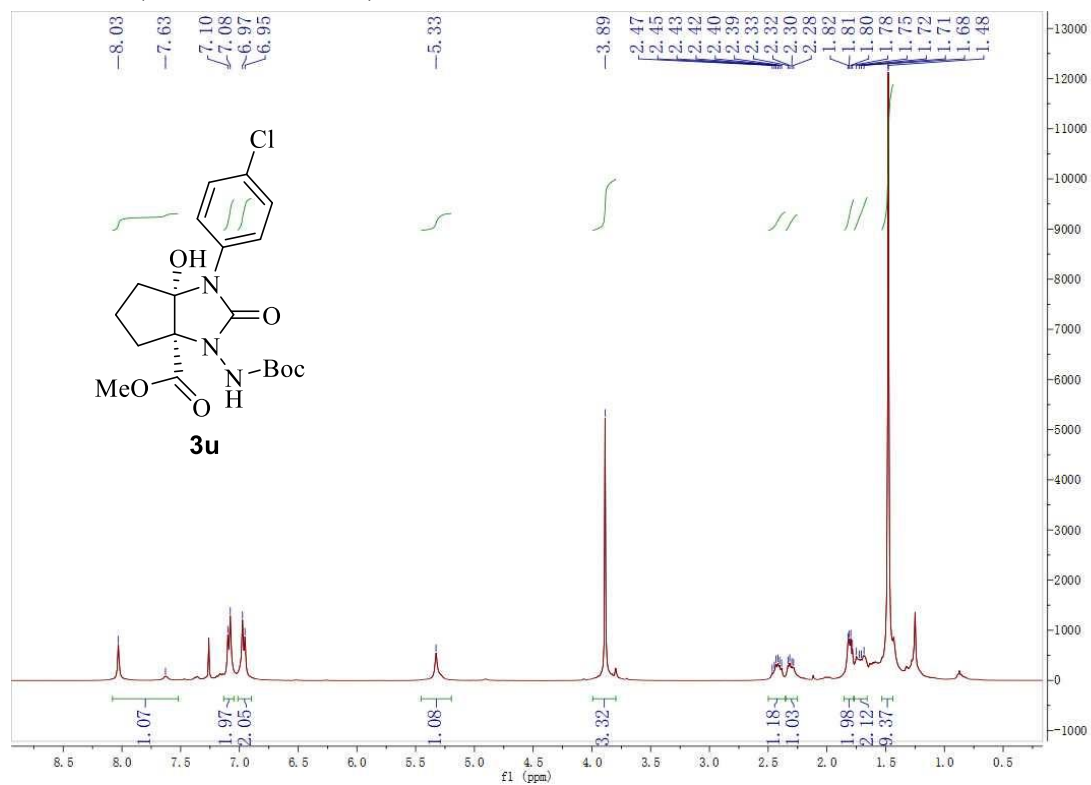

$^{13}\text{C}$  NMR (100 MHz,  $\text{CDCl}_3$ )

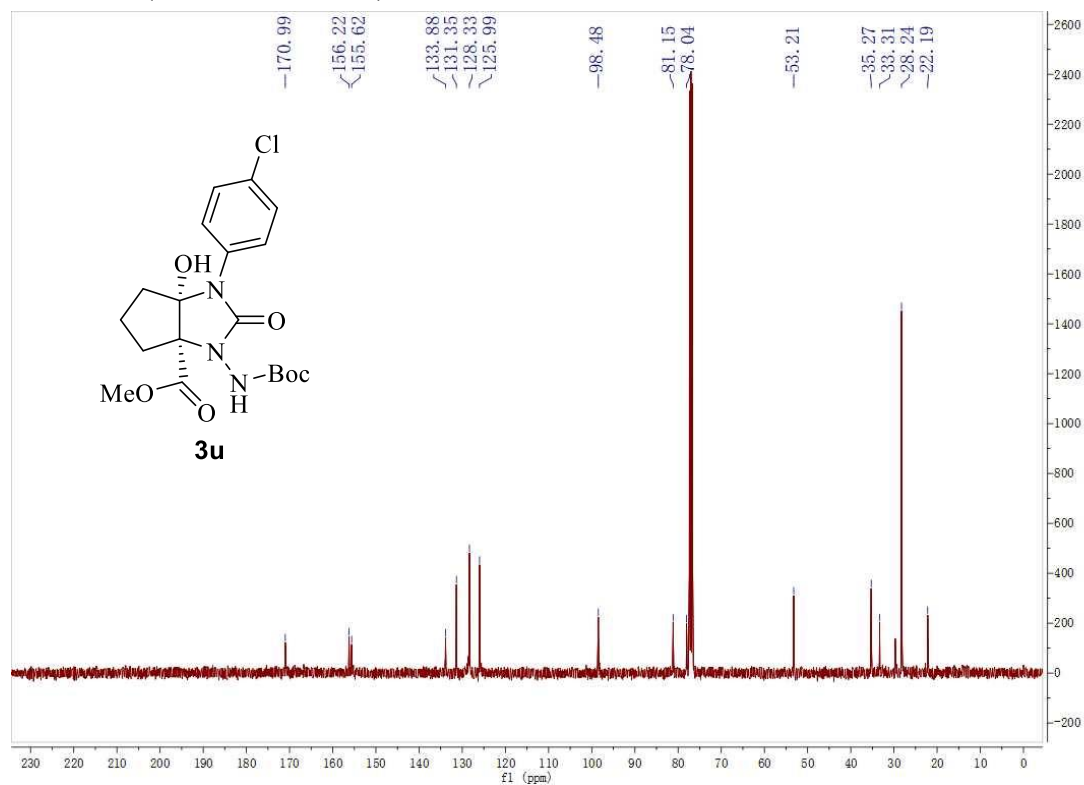

$^1\text{H}$  NMR (400 MHz,  $\text{DMSO}-d_6$ )

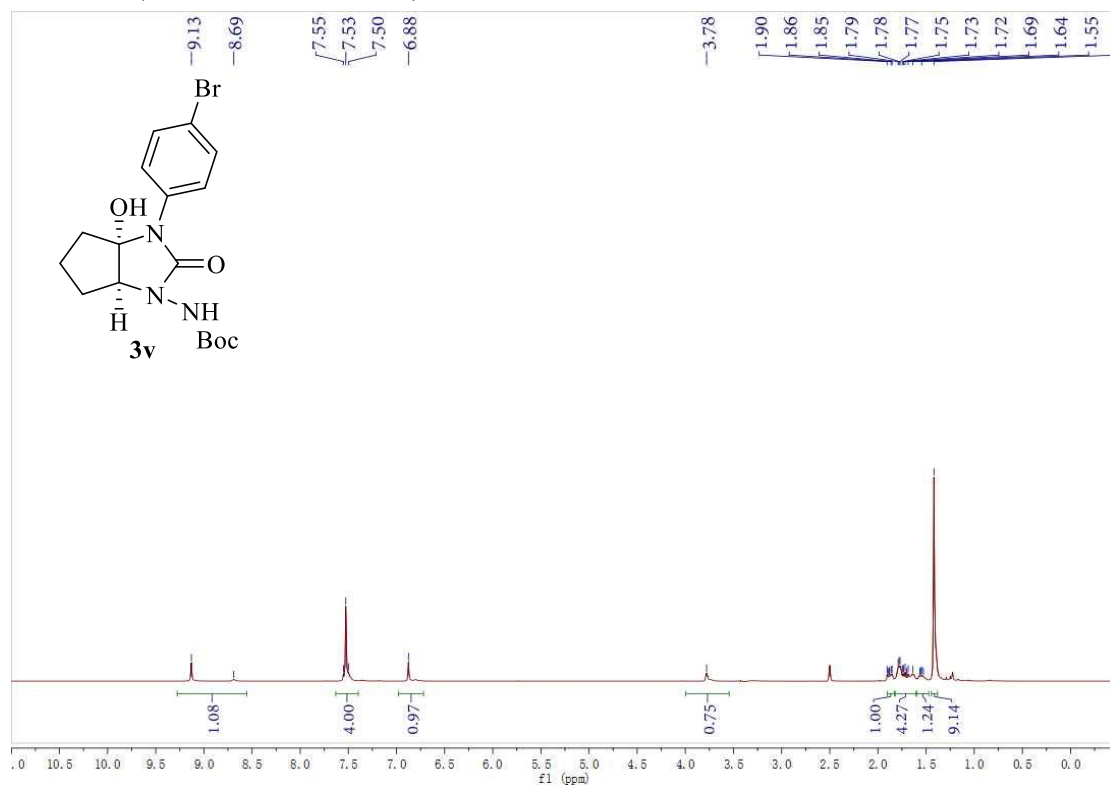

$^{13}\text{C}$  NMR (100 MHz,  $\text{DMSO-}d_6$ )

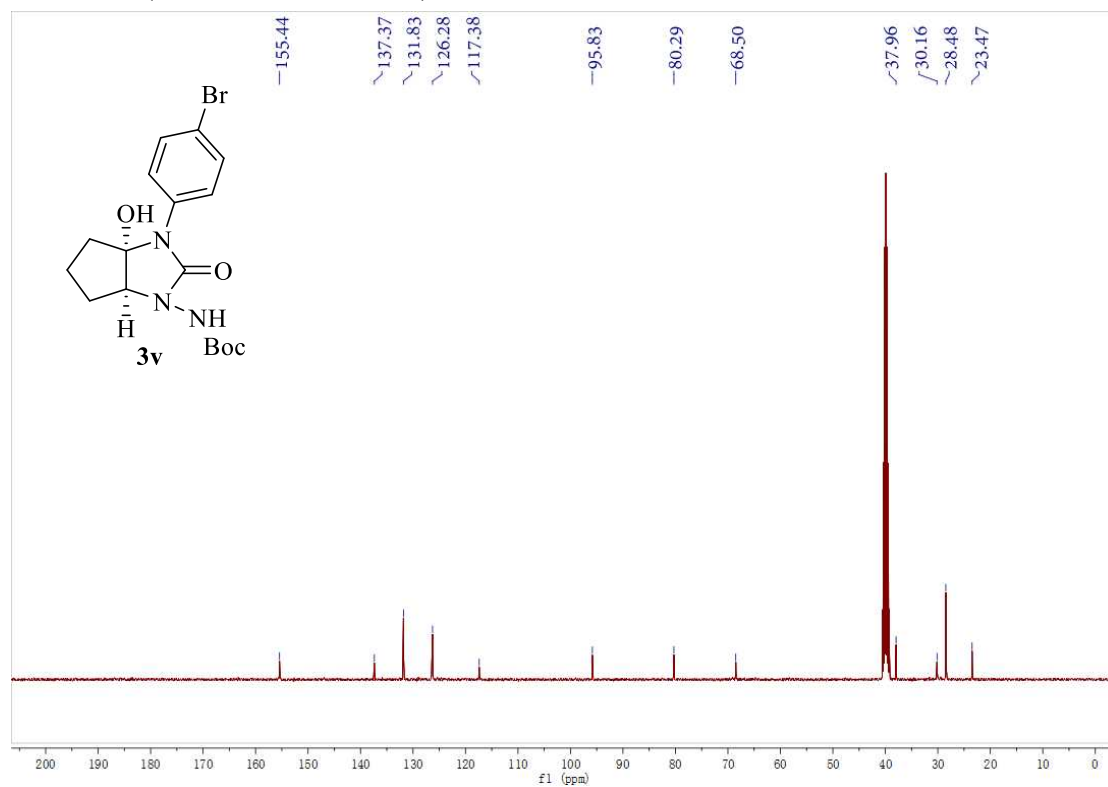

$^1\text{H}$  NMR (400 MHz,  $\text{DMSO-}d_6$ )

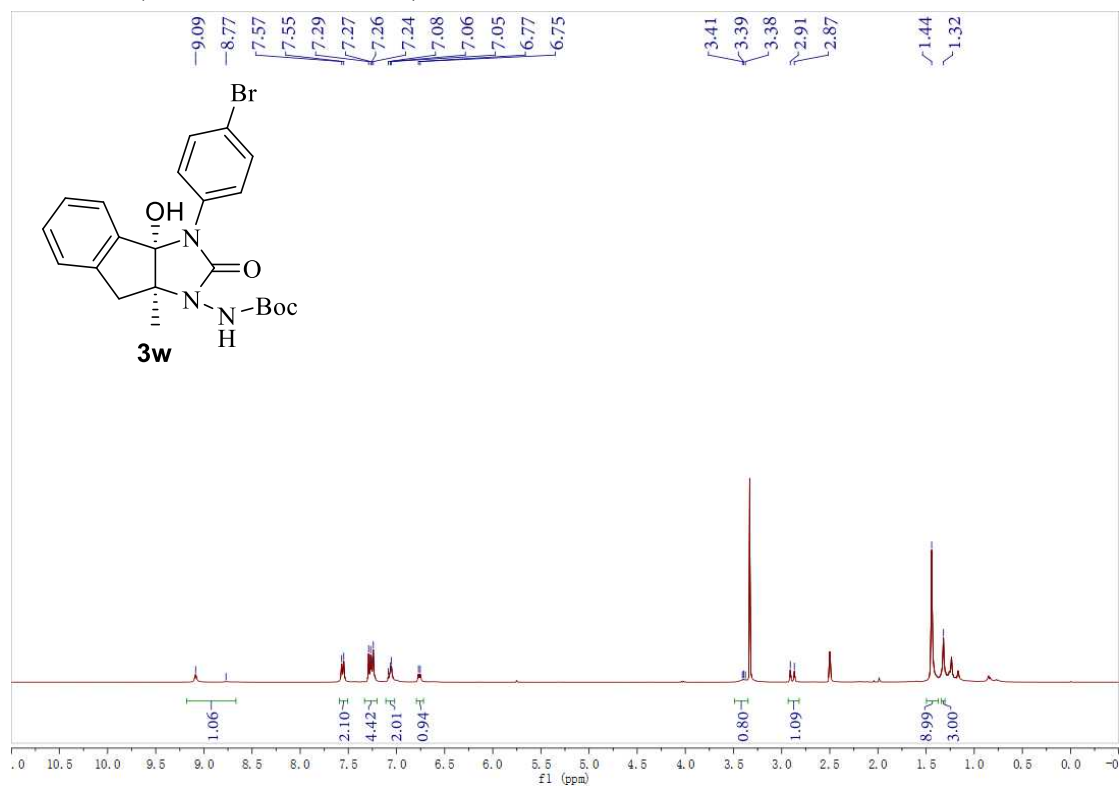

$^{13}\text{C}$  NMR (100 MHz,  $\text{DMSO-}d_6$ )

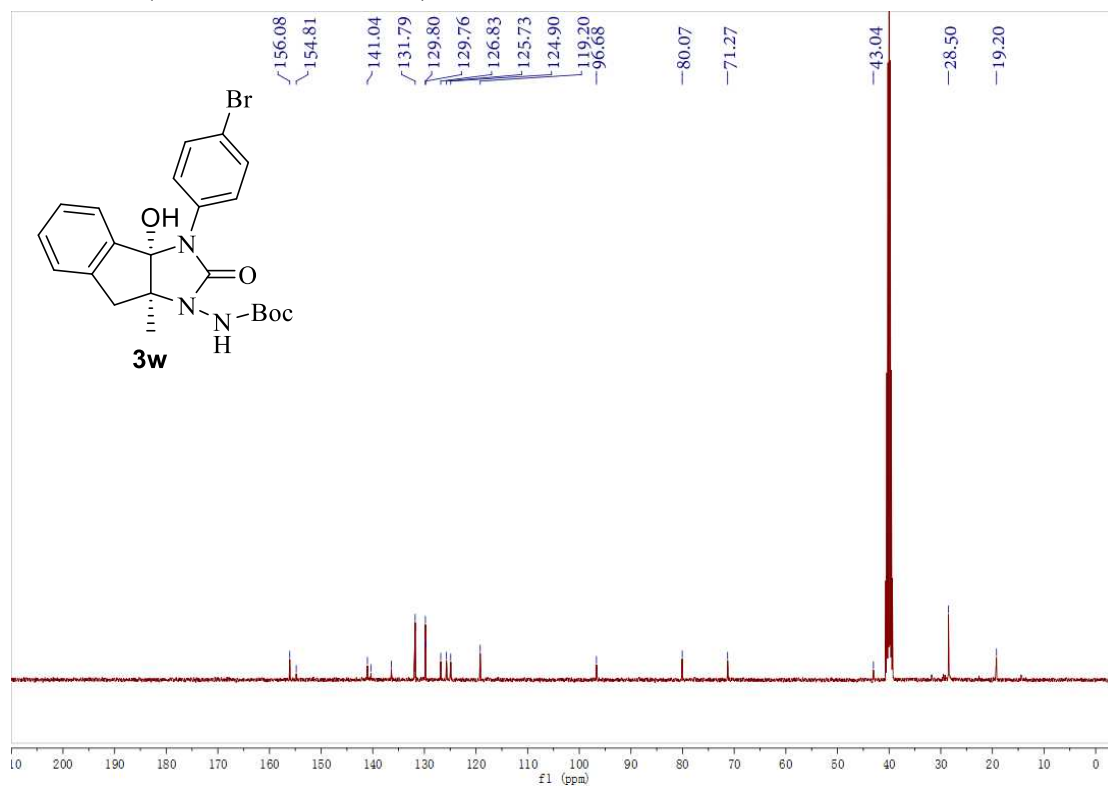

$^1\text{H}$  NMR (400 MHz,  $\text{DMSO-}d_6$ )

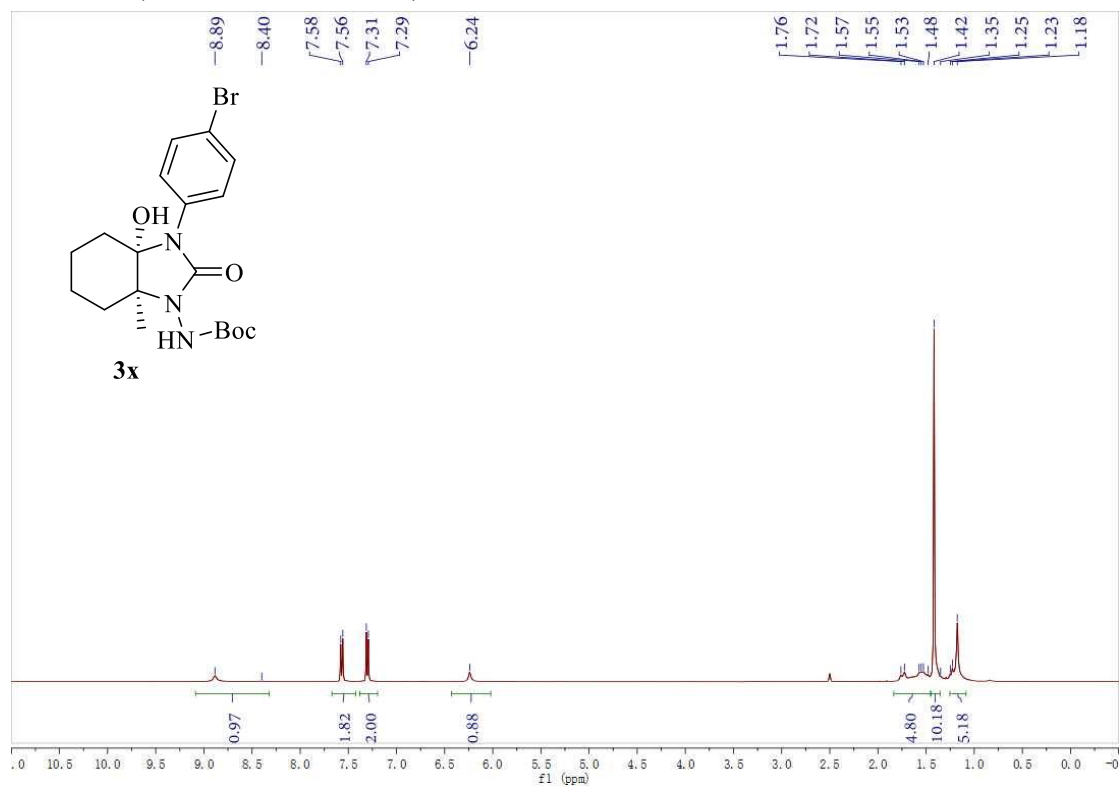



$^{13}\text{C}$  NMR (100 MHz,  $\text{DMSO-}d_6$ )

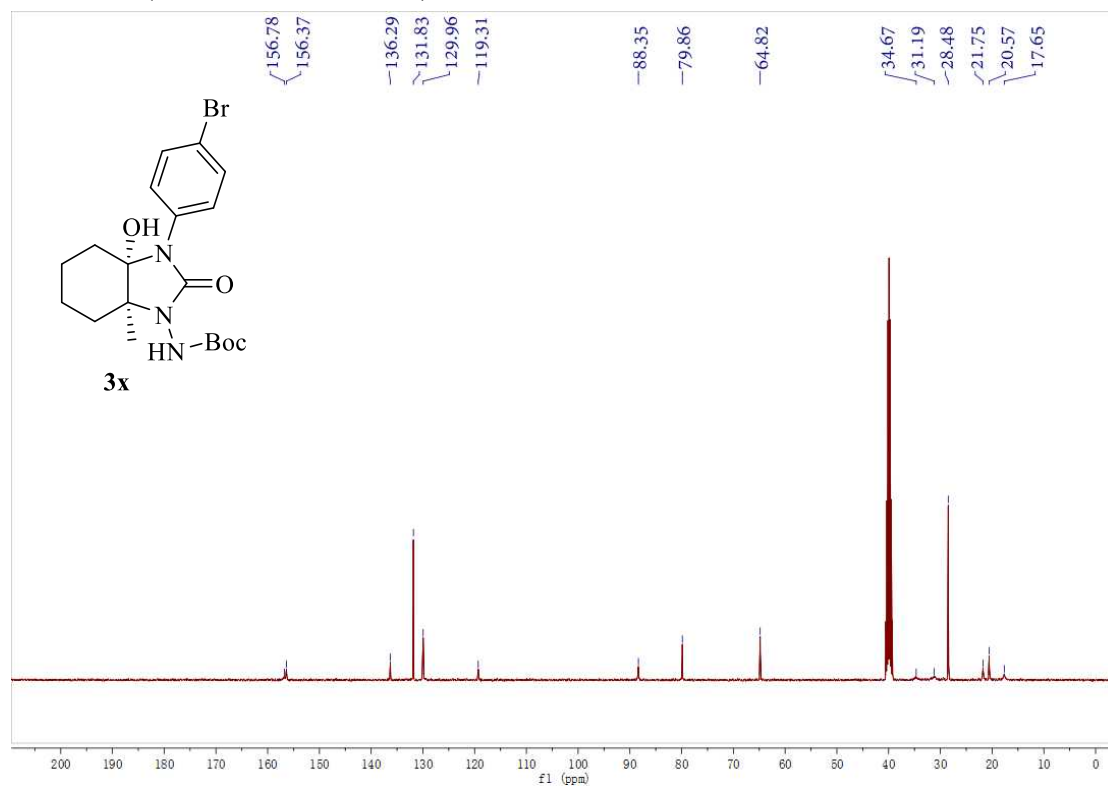

$^1\text{H}$  NMR (400 MHz,  $\text{CDCl}_3$ )

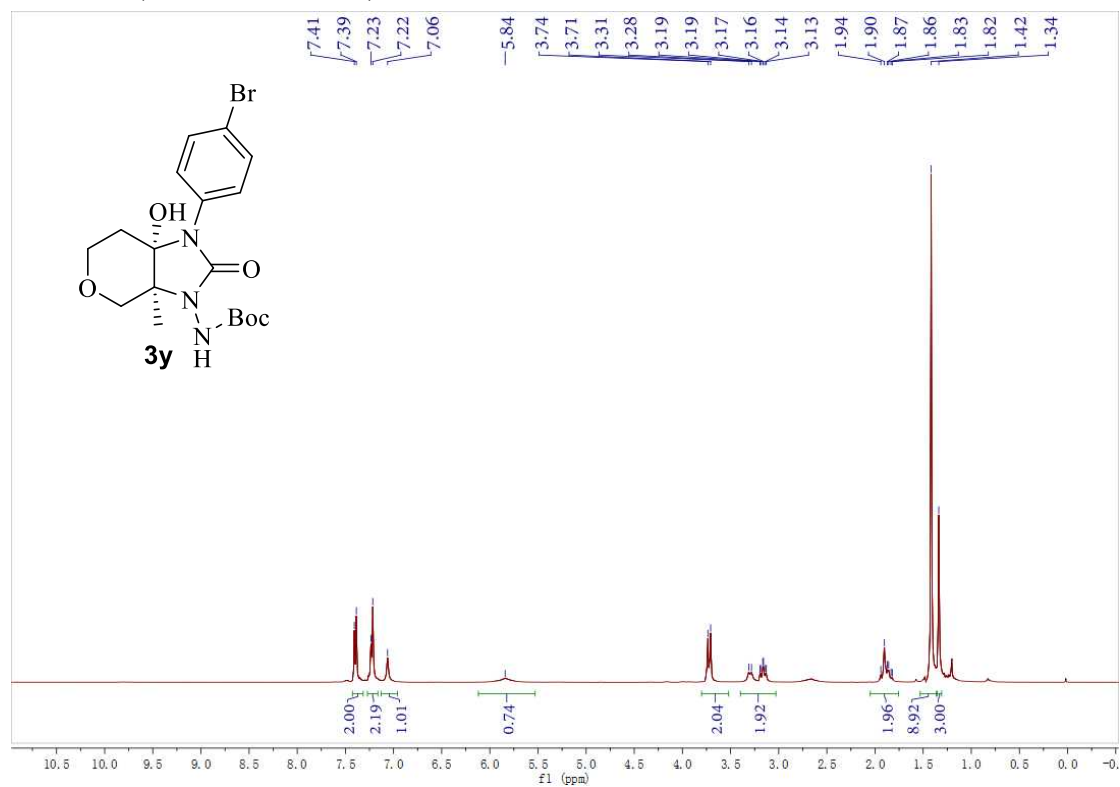

$^{13}\text{C}$  NMR (100 MHz,  $\text{CDCl}_3$ )

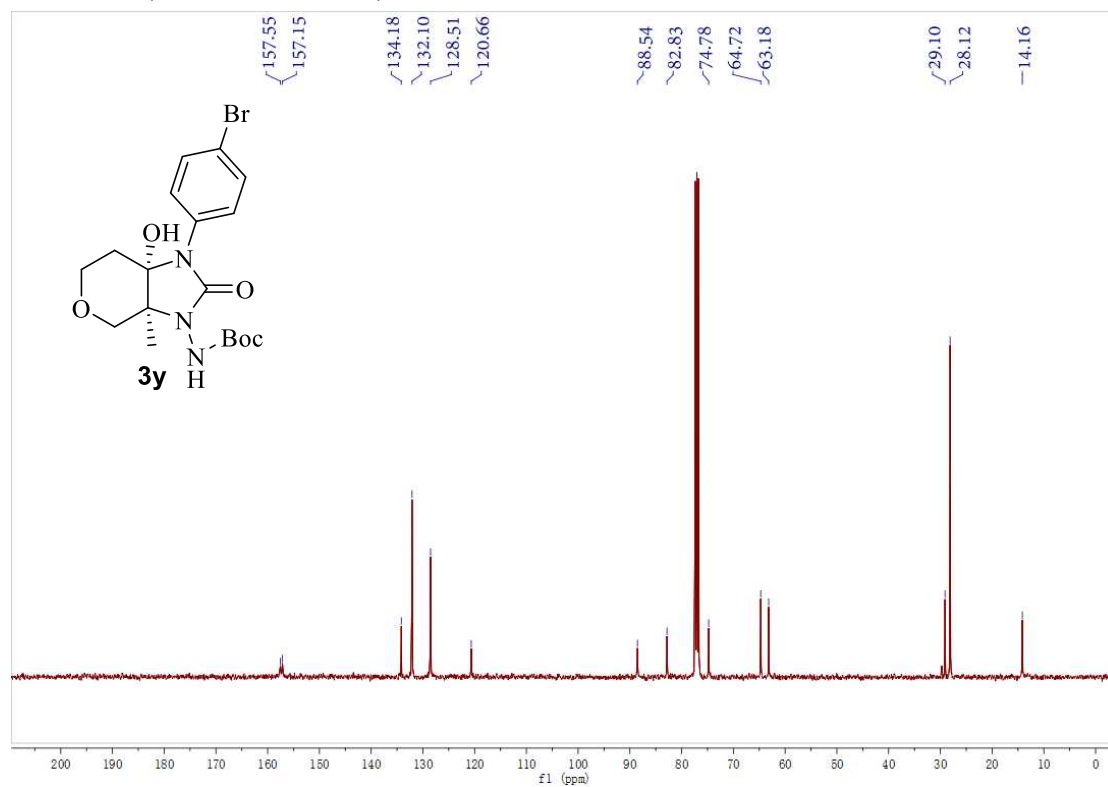

$^1\text{H}$  NMR (400 MHz,  $\text{CDCl}_3$ )

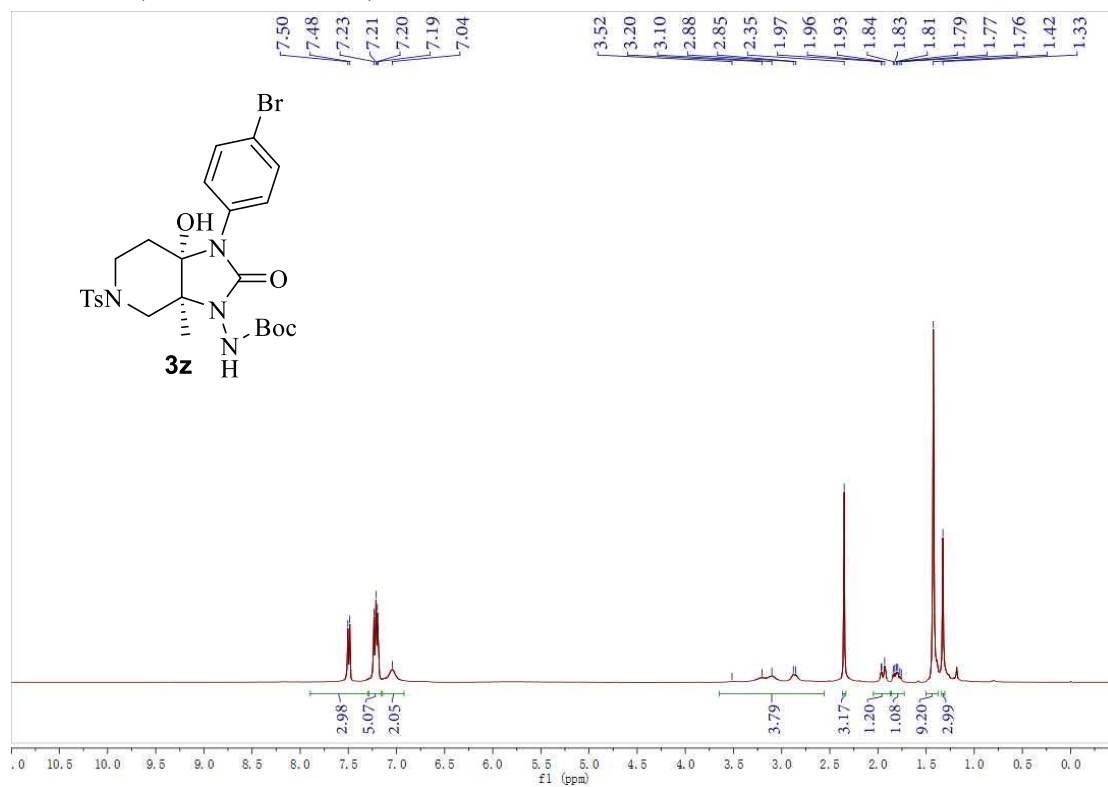

$^{13}\text{C}$  NMR (100 MHz,  $\text{CDCl}_3$ )

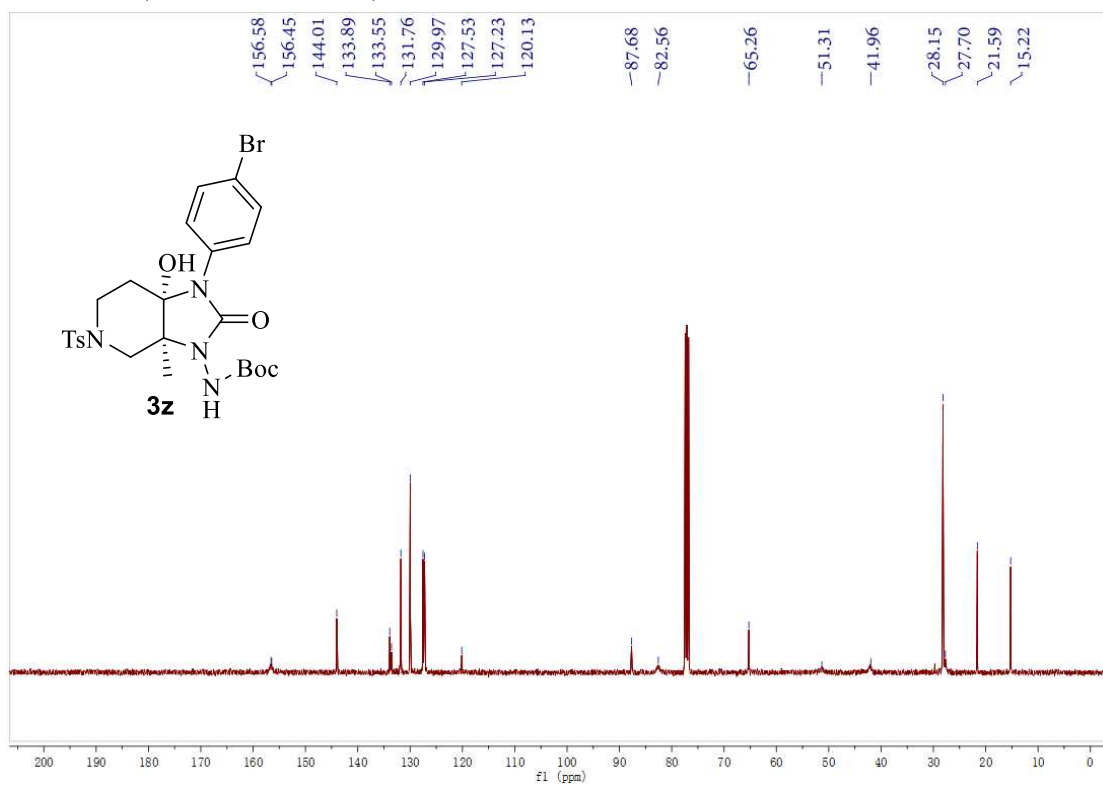

$^1\text{H}$  NMR (400 MHz,  $\text{CDCl}_3$ )

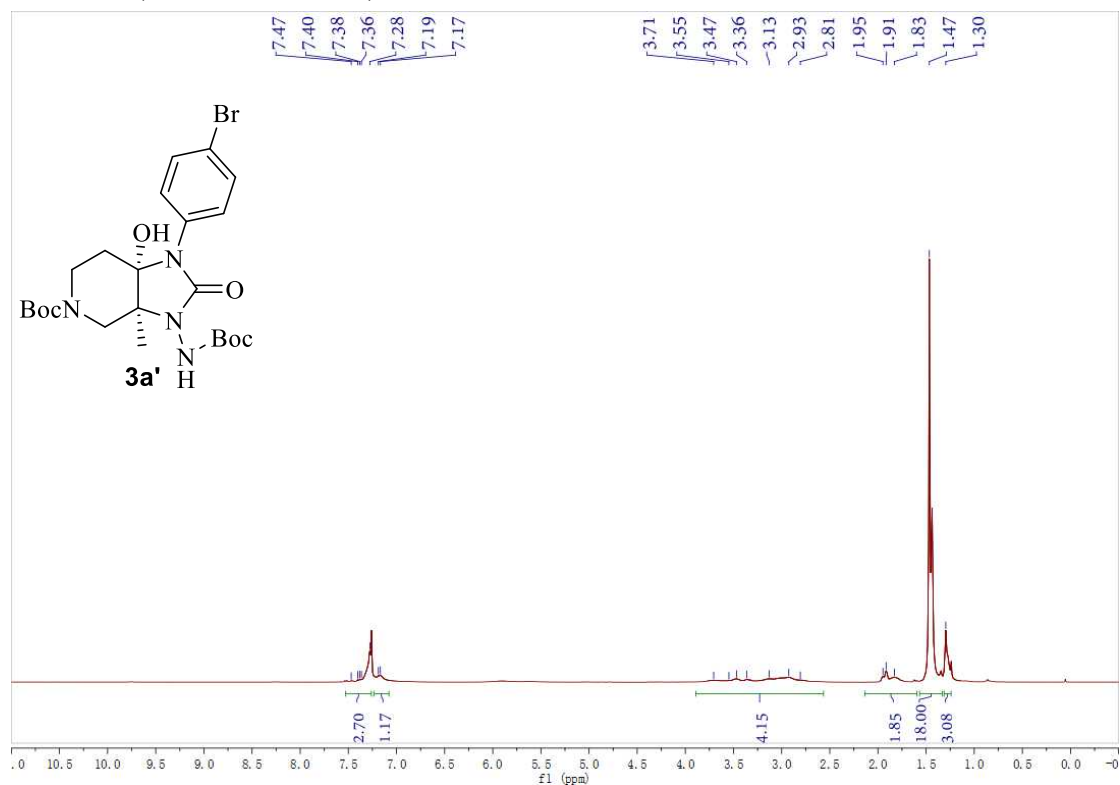

$^{13}\text{C}$  NMR (100 MHz,  $\text{CDCl}_3$ )

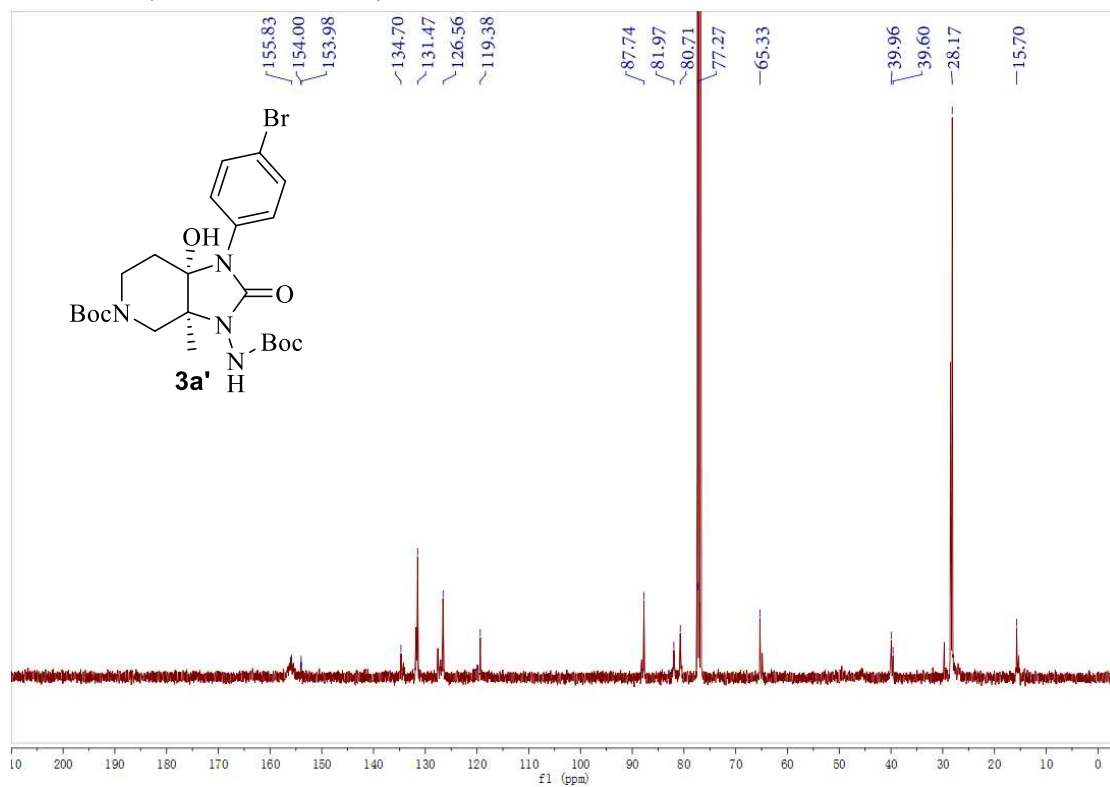

$^1\text{H}$  NMR (400 MHz,  $\text{CDCl}_3$ )

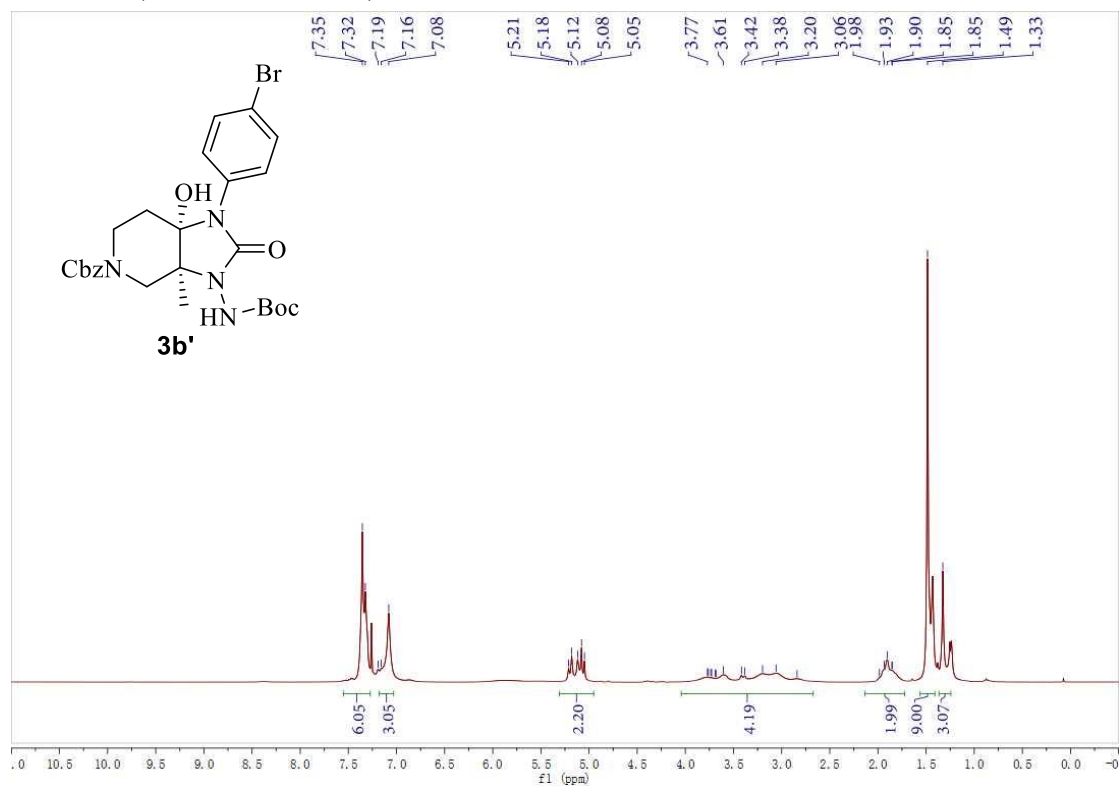

$^{13}\text{C}$  NMR (100 MHz,  $\text{CDCl}_3$ )

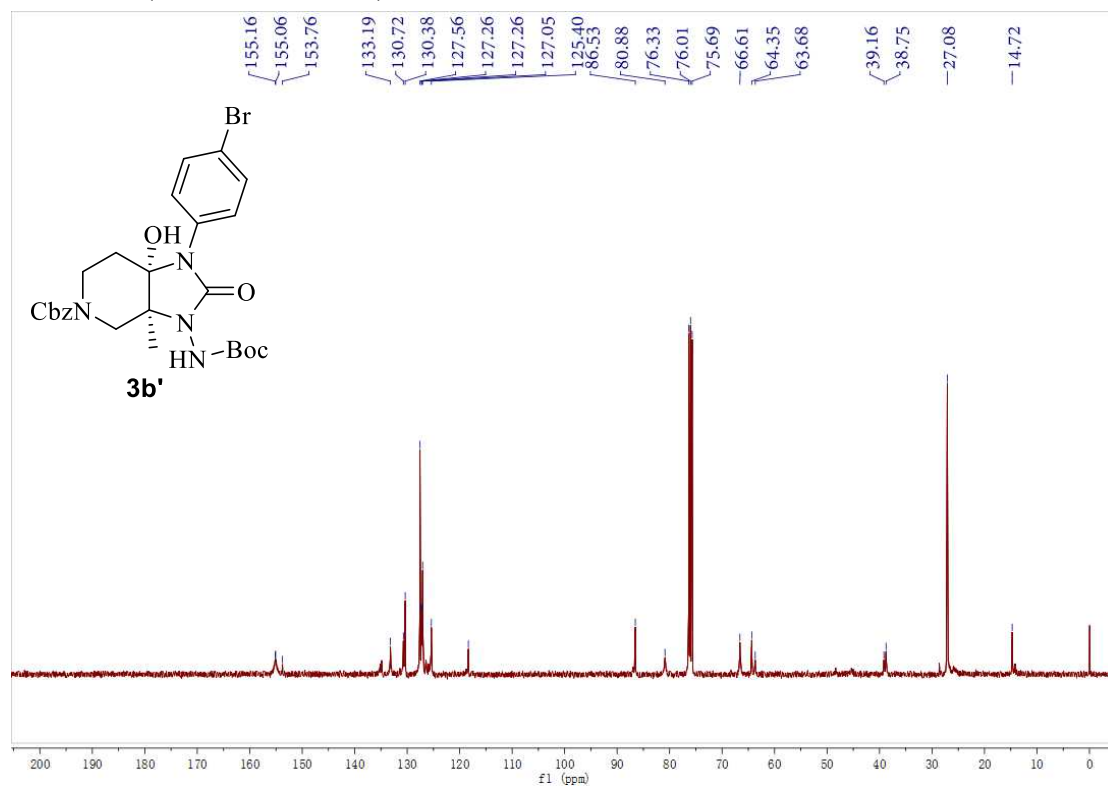

$^1\text{H}$  NMR (400 MHz,  $\text{CDCl}_3$ )

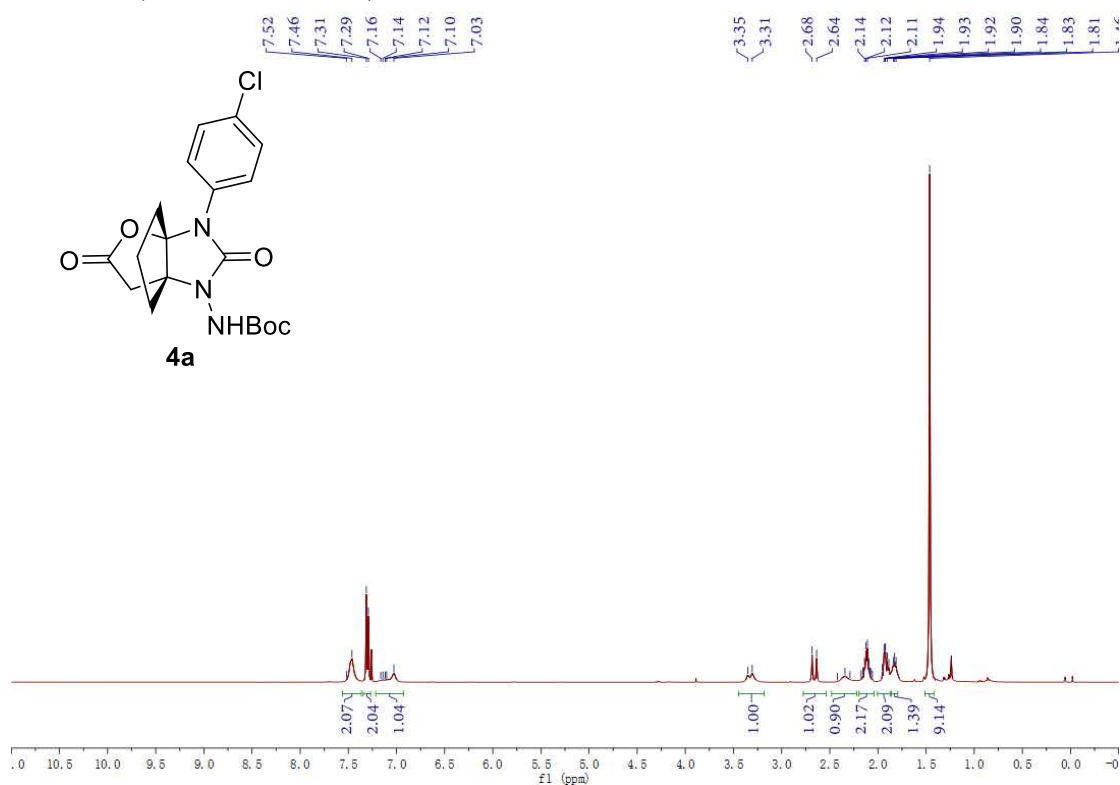

$^{13}\text{C}$  NMR (100 MHz,  $\text{CDCl}_3$ )

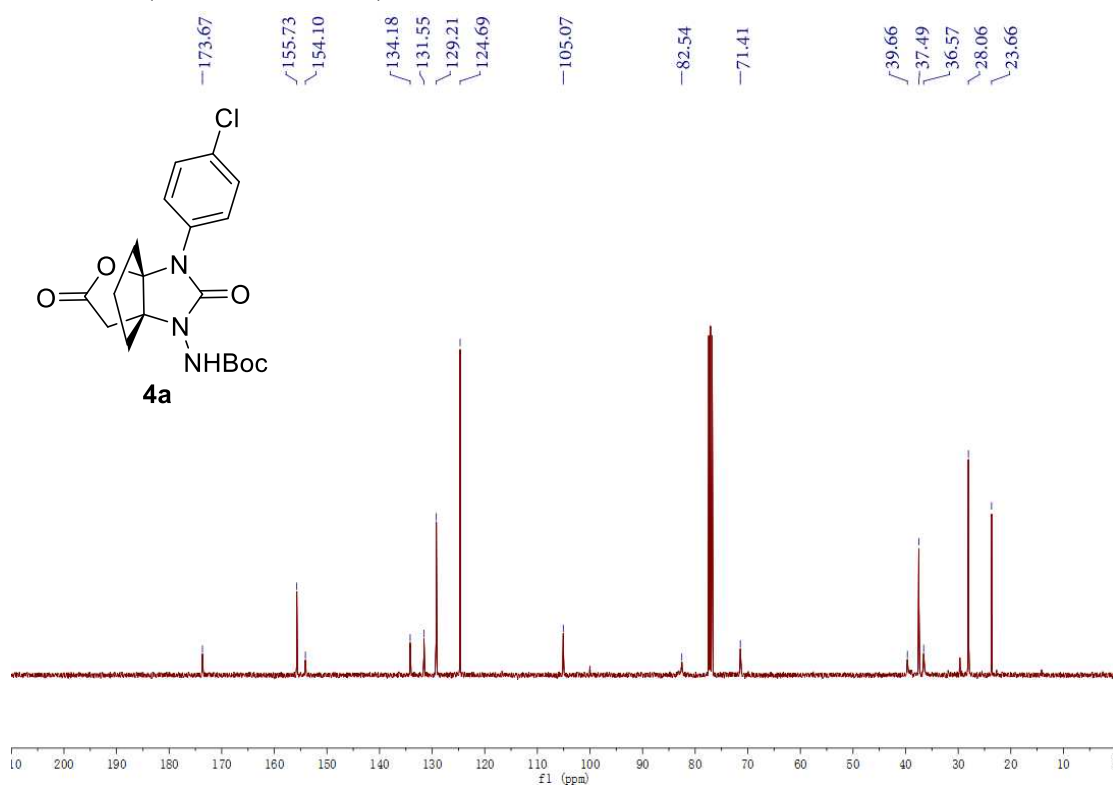

$^1\text{H}$  NMR (400 MHz,  $\text{DMSO}-d_6$ )

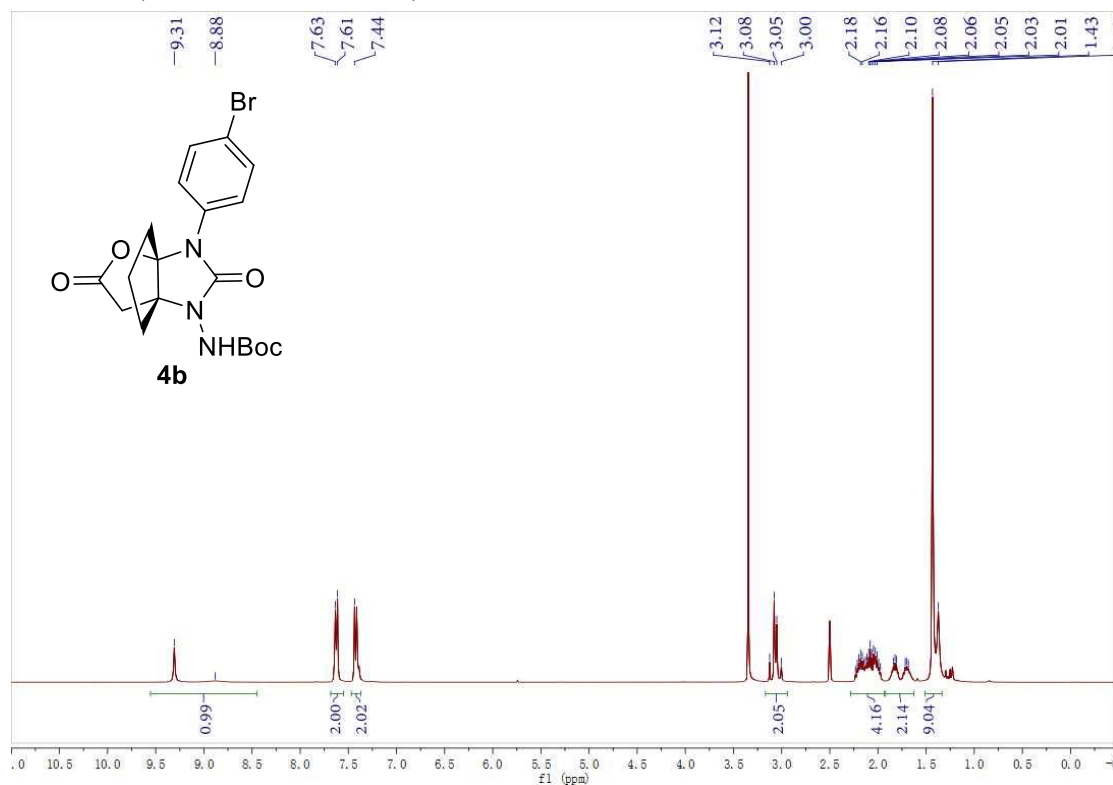

$^{13}\text{C}$  NMR (100 MHz,  $\text{DMSO-}d_6$ )

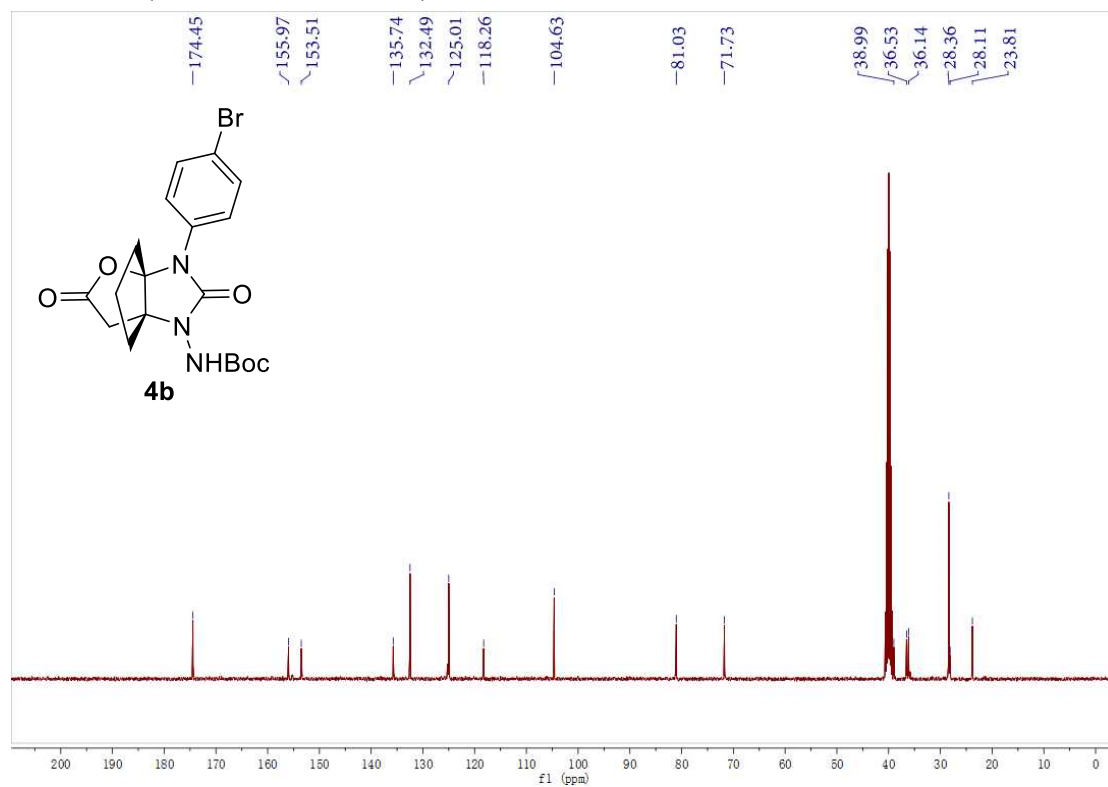

$^1\text{H}$  NMR (400 MHz,  $\text{CDCl}_3$ )

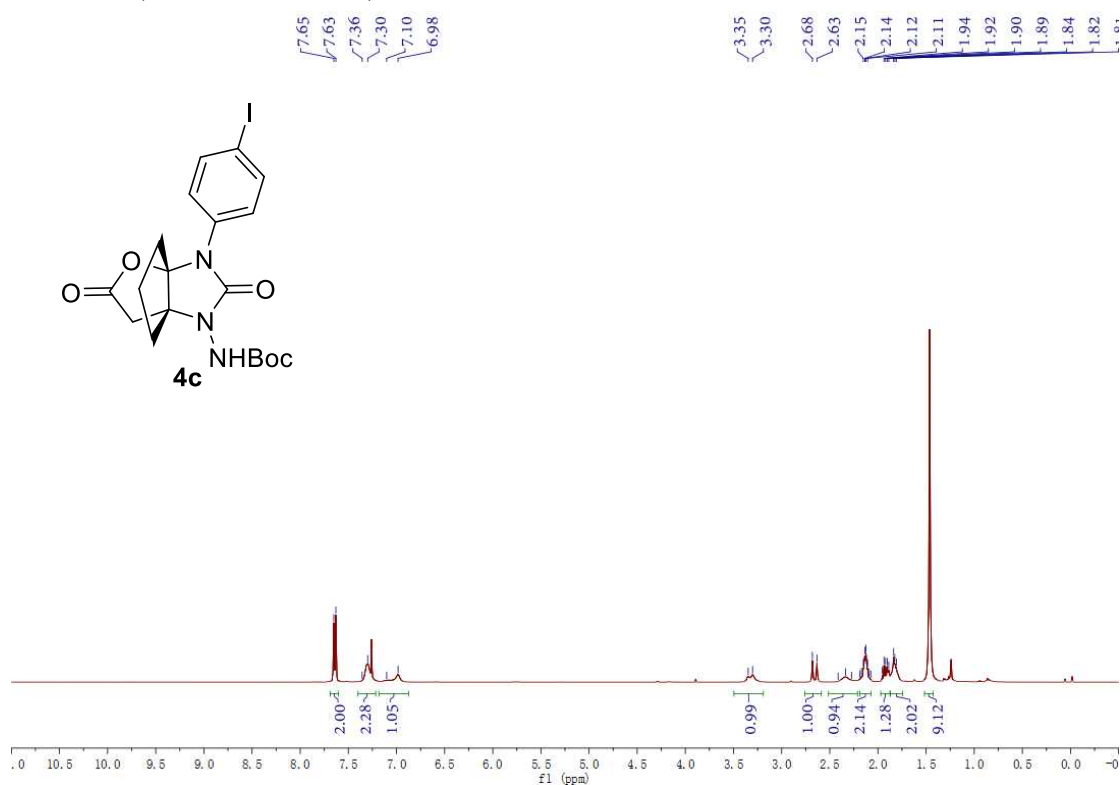

$^{13}\text{C}$  NMR (100 MHz,  $\text{CDCl}_3$ )

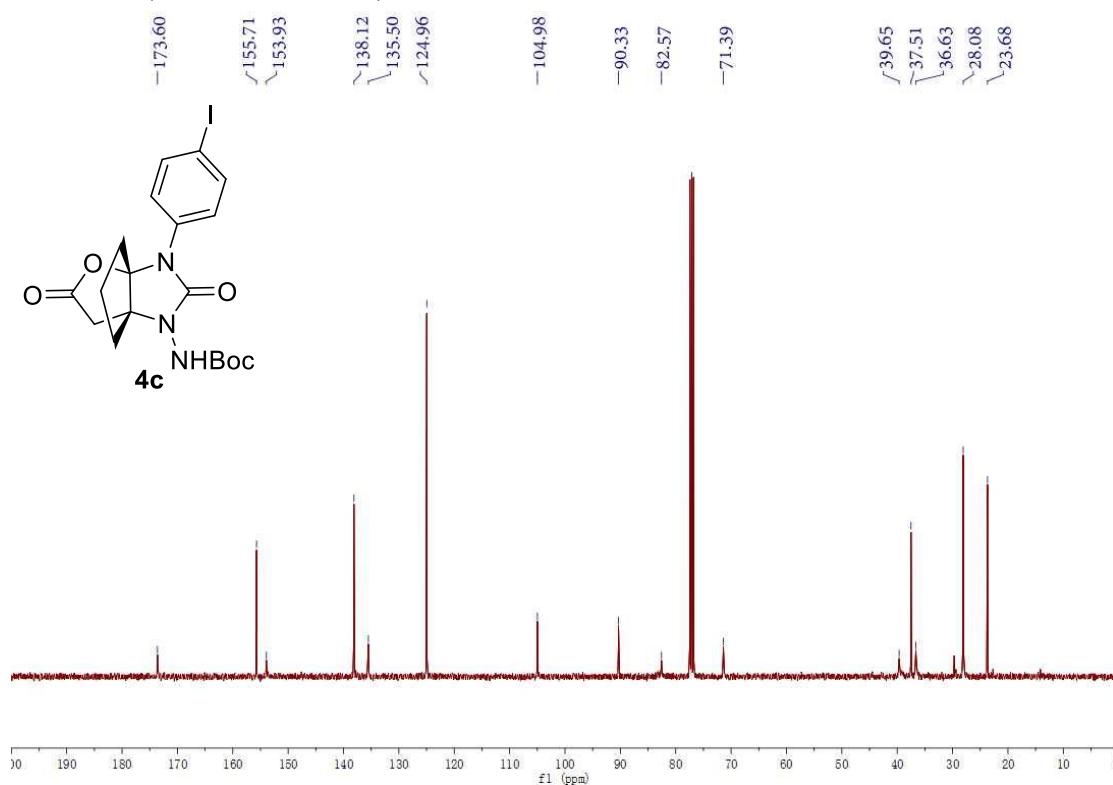

$^1\text{H}$  NMR (400 MHz,  $\text{CDCl}_3$ )

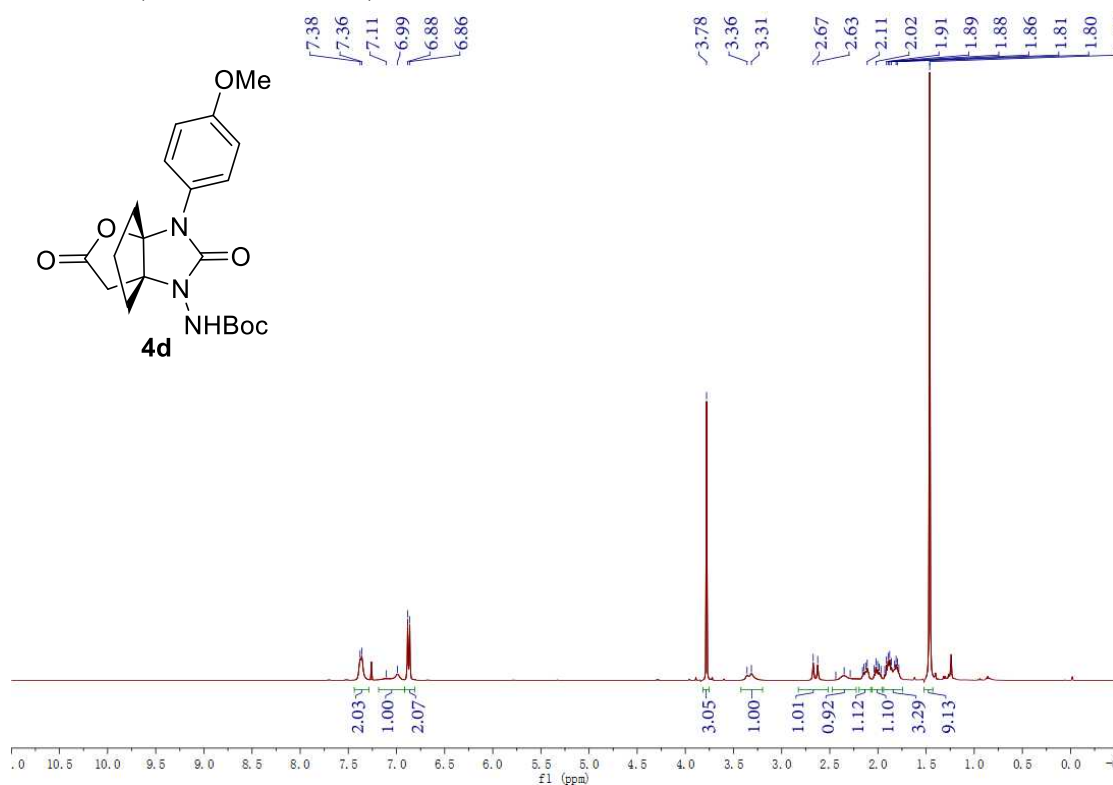



$^{13}\text{C}$  NMR (100 MHz,  $\text{CDCl}_3$ )

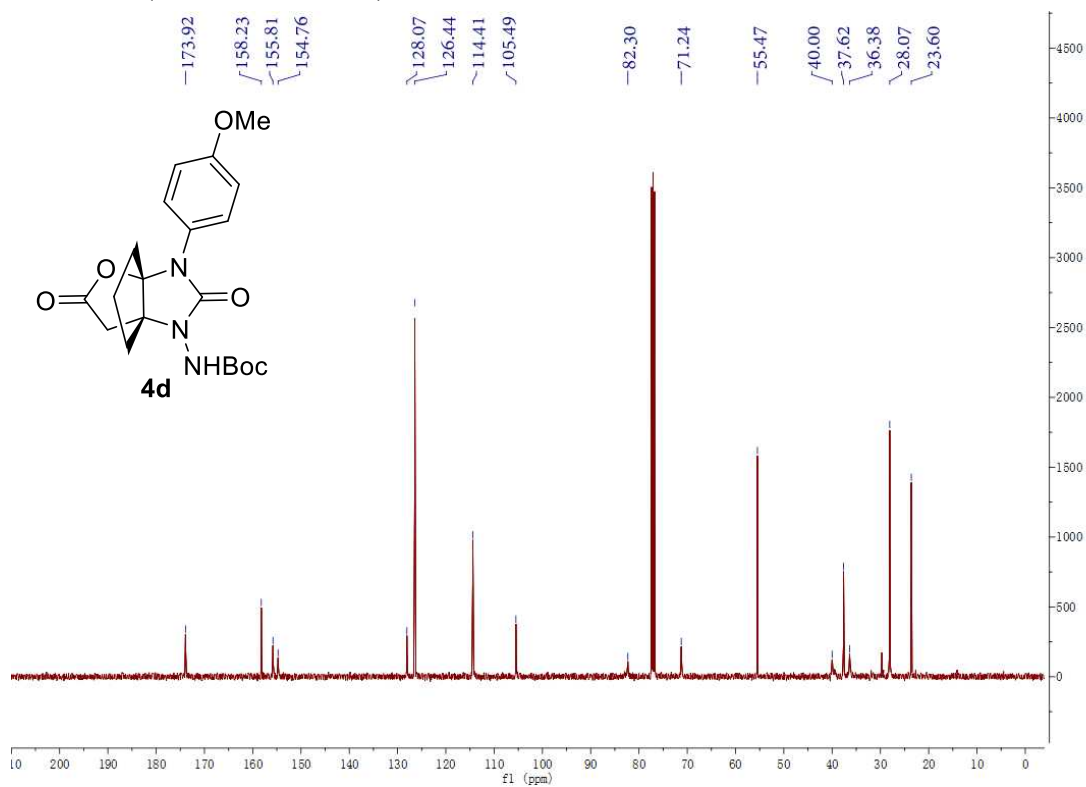

$^1\text{H}$  NMR (400 MHz,  $\text{CDCl}_3$ )

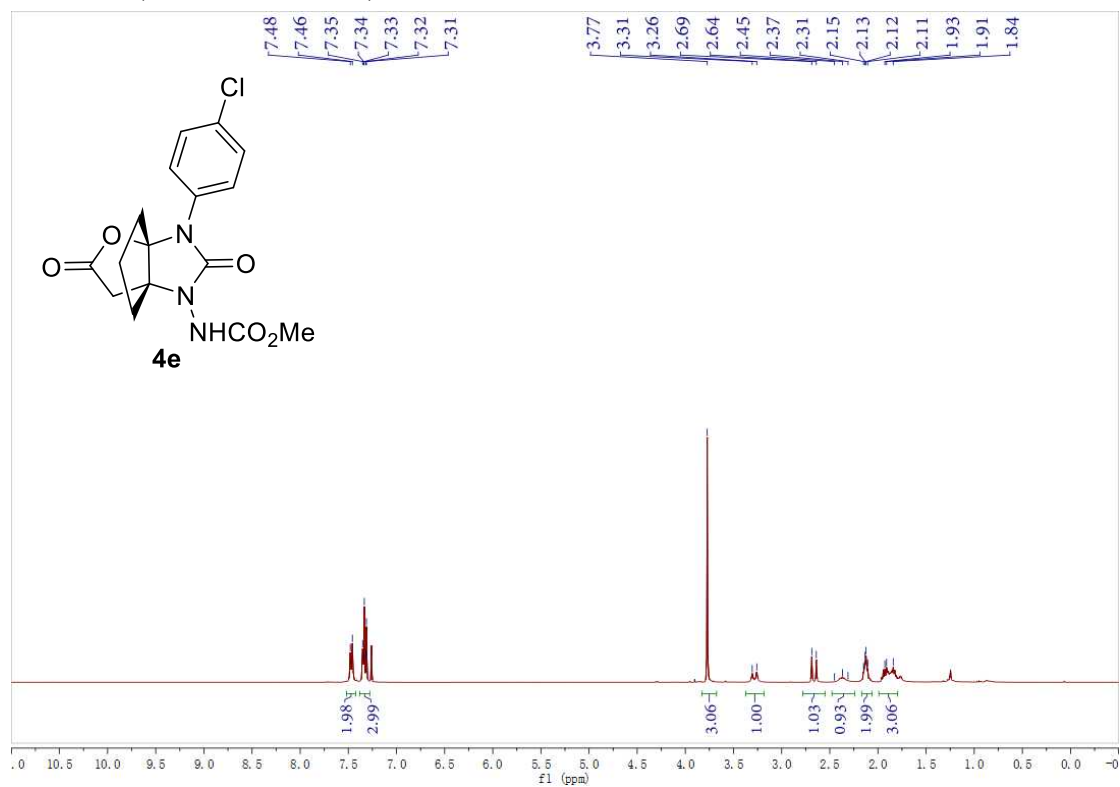

$^{13}\text{C}$  NMR (100 MHz,  $\text{CDCl}_3$ )

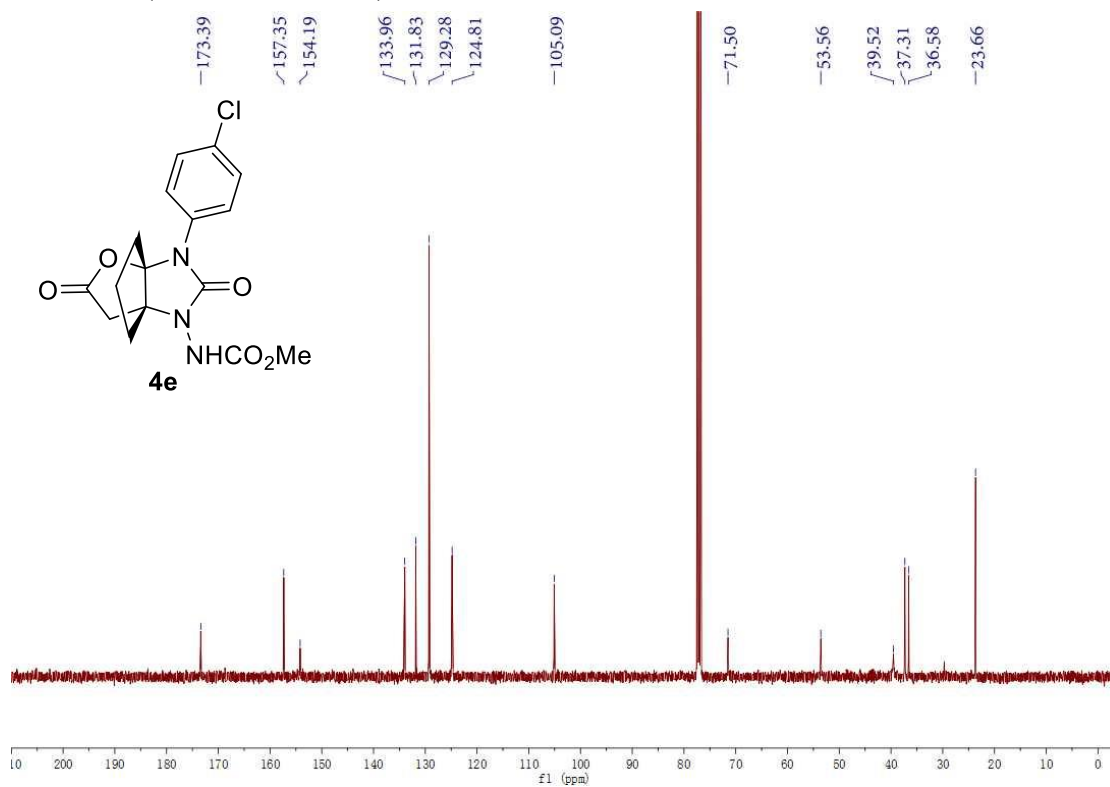

$^1\text{H}$  NMR (400 MHz,  $\text{CDCl}_3$ )

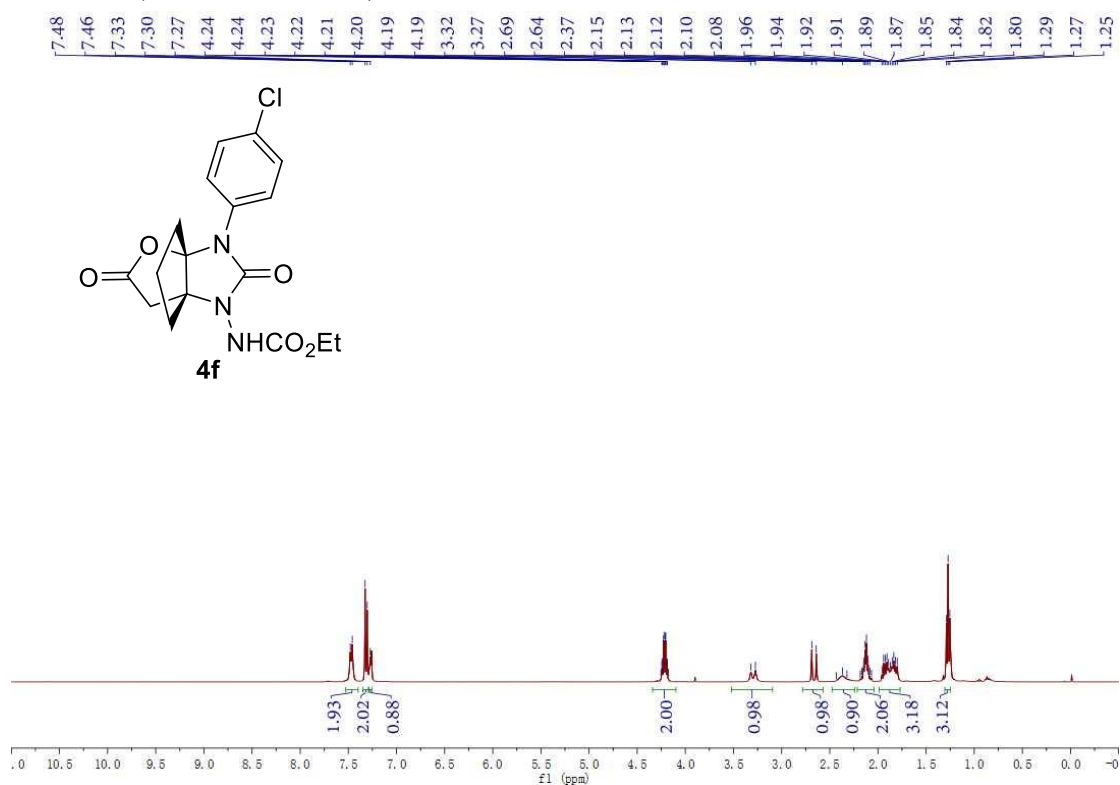

<sup>13</sup>C NMR (100 MHz, CDCl<sub>3</sub>)

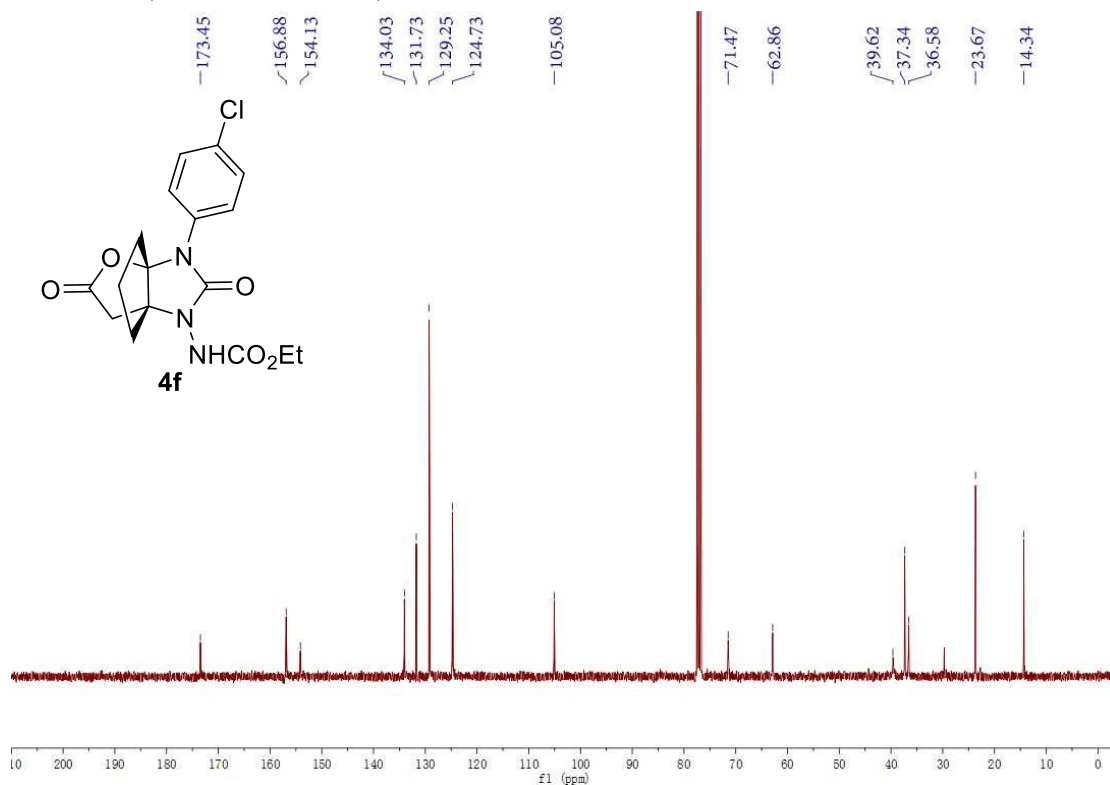

<sup>1</sup>H NMR (400 MHz, CDCl<sub>3</sub>)

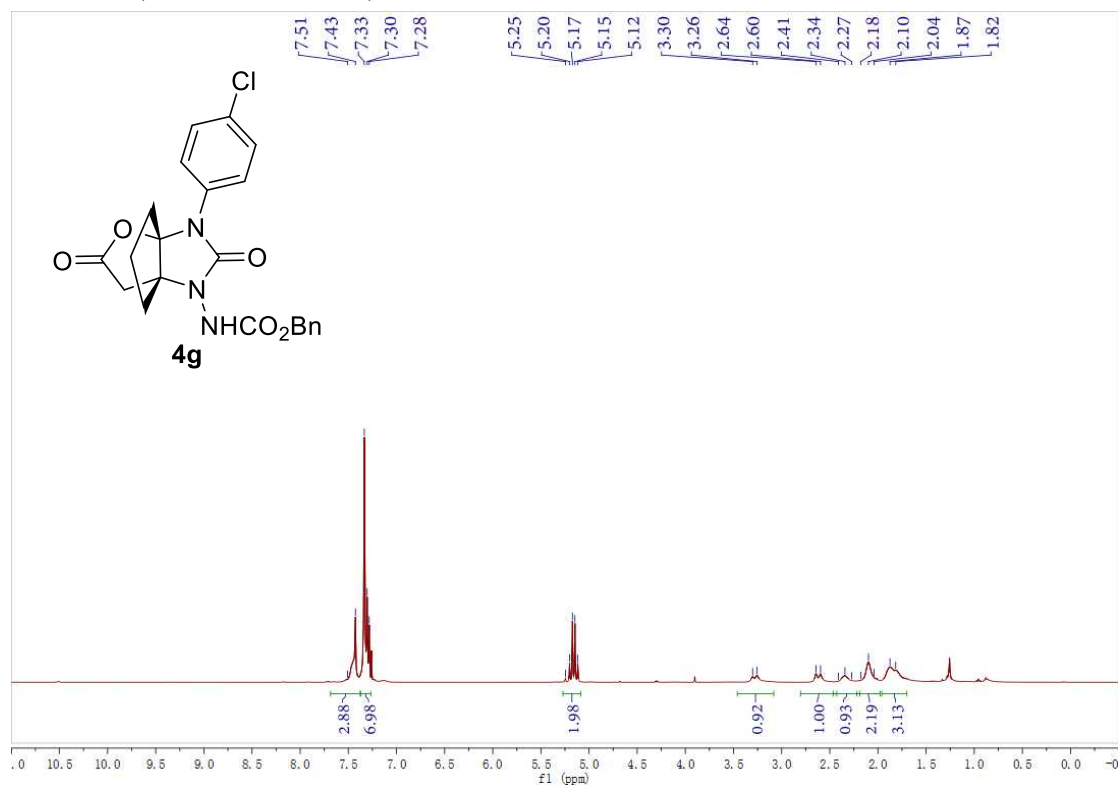

<sup>13</sup>C NMR (100 MHz, CDCl<sub>3</sub>)

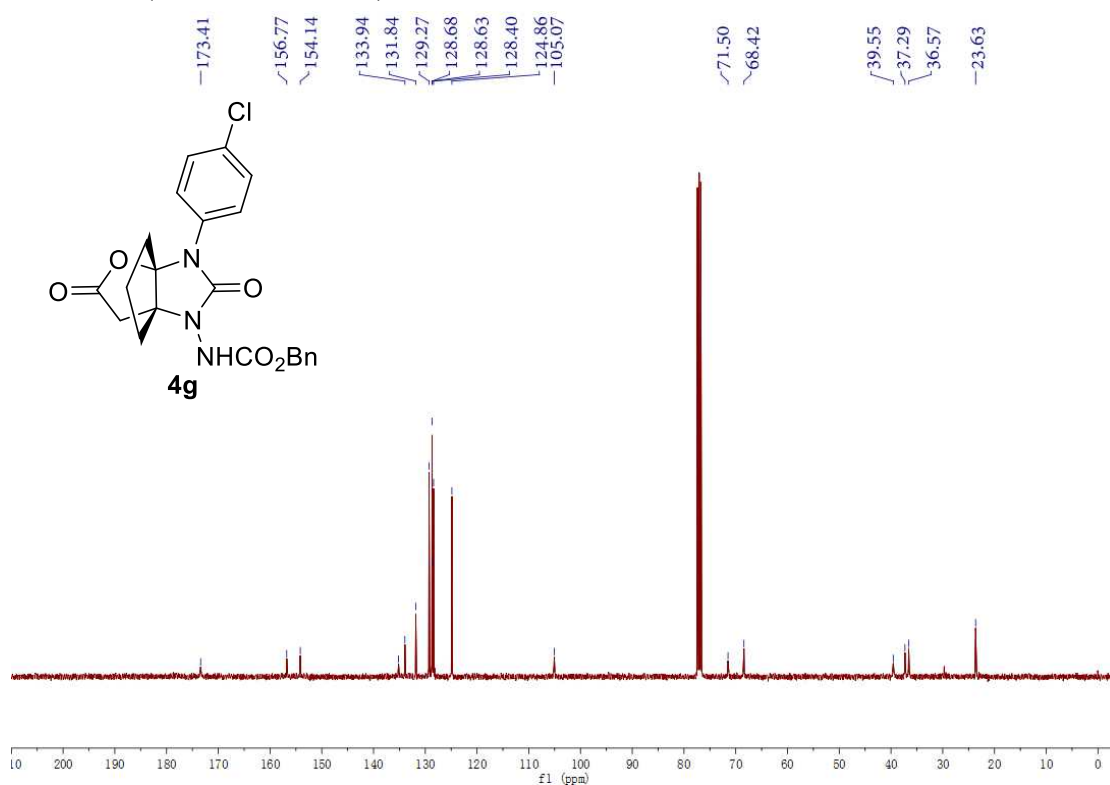

<sup>1</sup>H NMR (400 MHz, CDCl<sub>3</sub>)

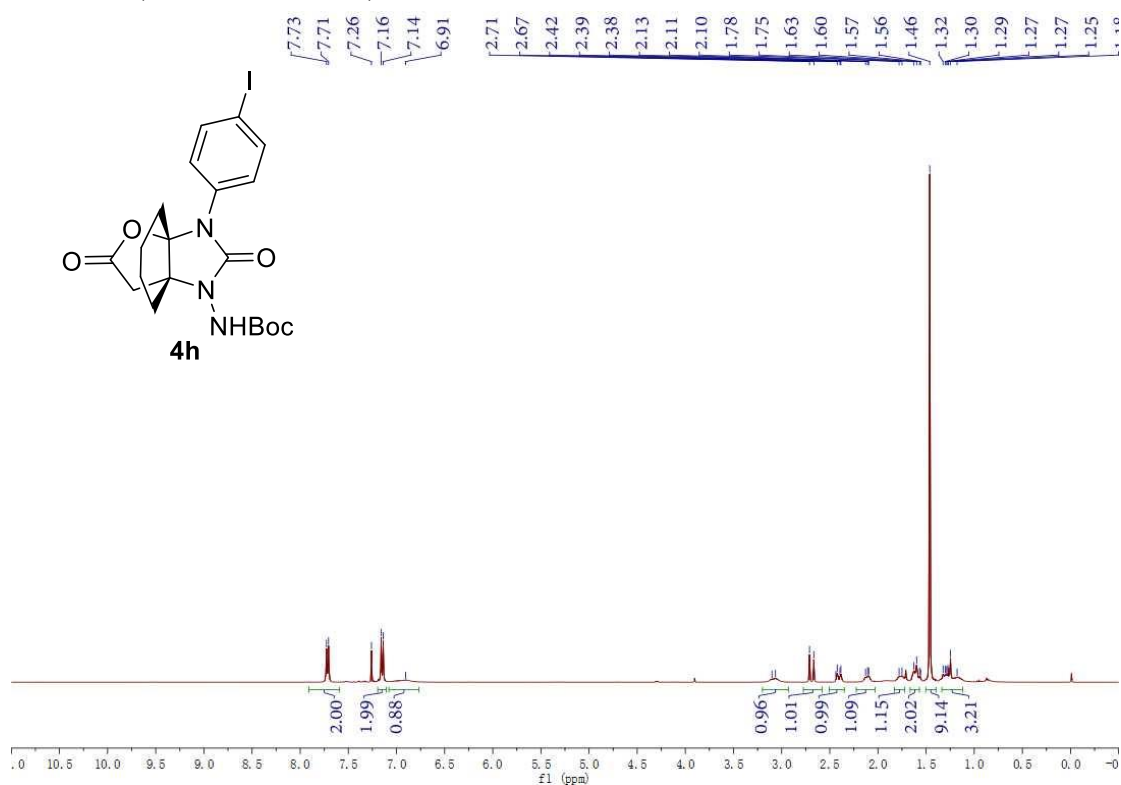

$^{13}\text{C}$  NMR (100 MHz,  $\text{CDCl}_3$ )

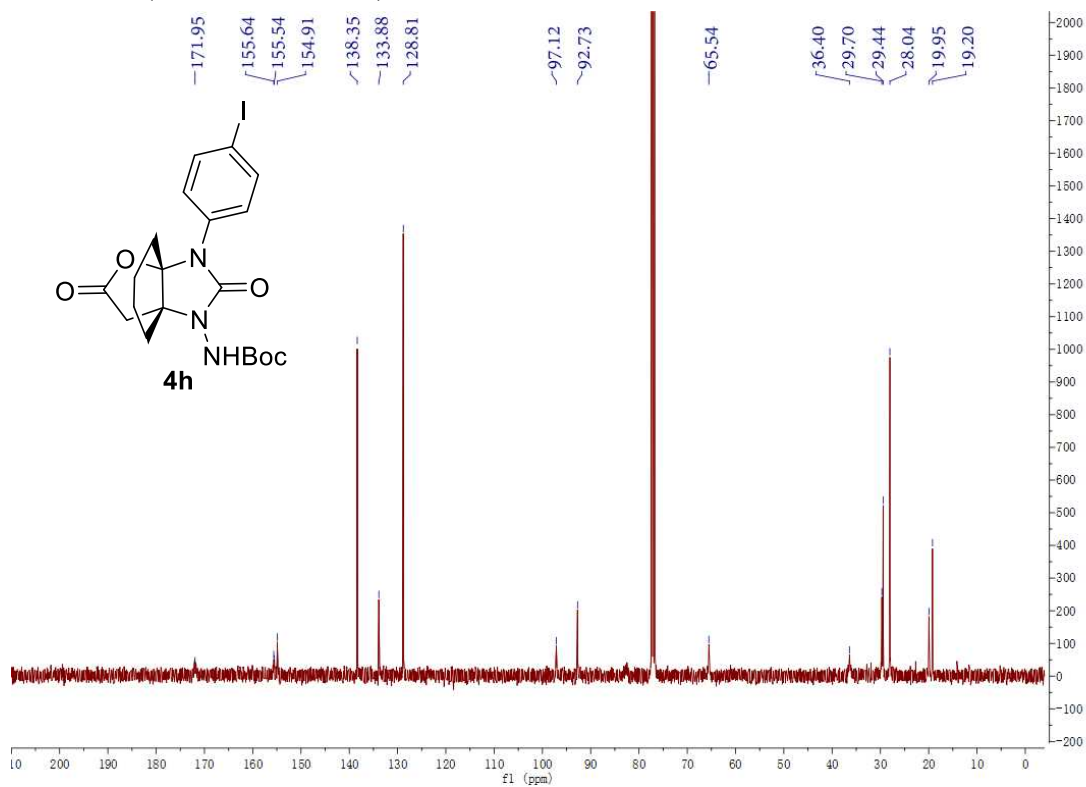

$^1\text{H}$  NMR (400 MHz,  $\text{CDCl}_3$ )

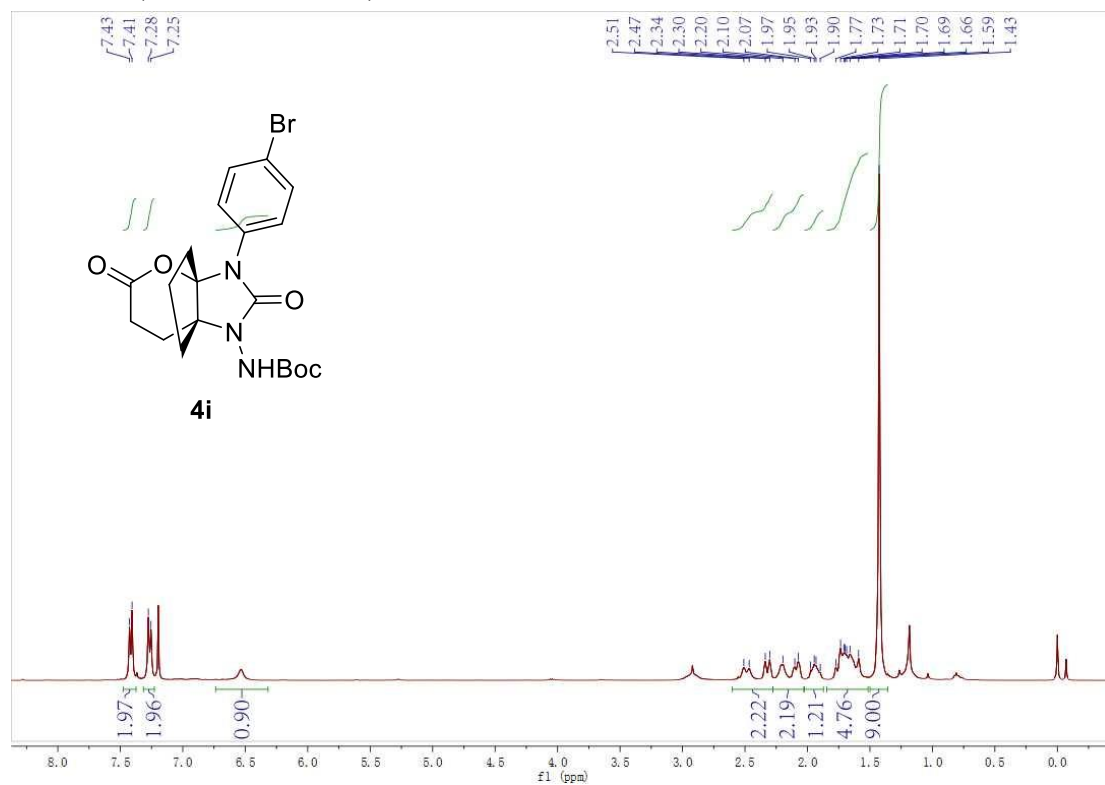

$^{13}\text{C}$  NMR (100 MHz,  $\text{CDCl}_3$ )

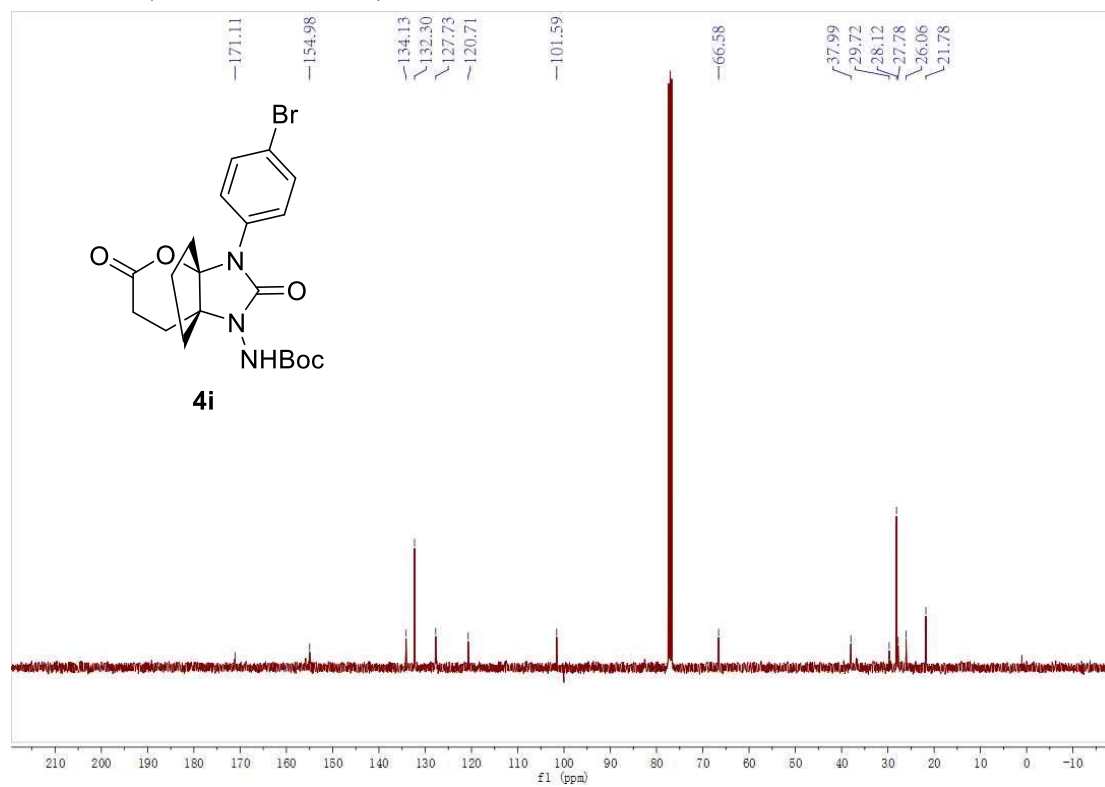

$^1\text{H}$  NMR (400 MHz,  $\text{DMSO}-d_6$ )

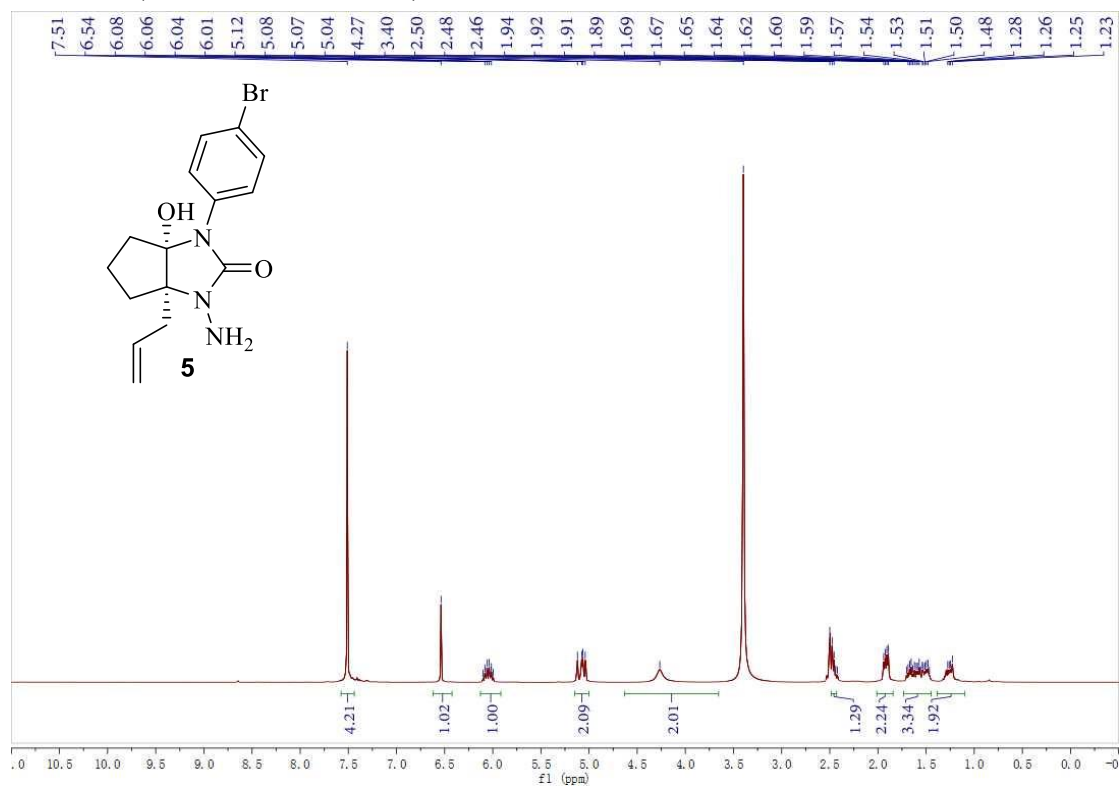

$^{13}\text{C}$  NMR (100 MHz,  $\text{DMSO-}d_6$ )

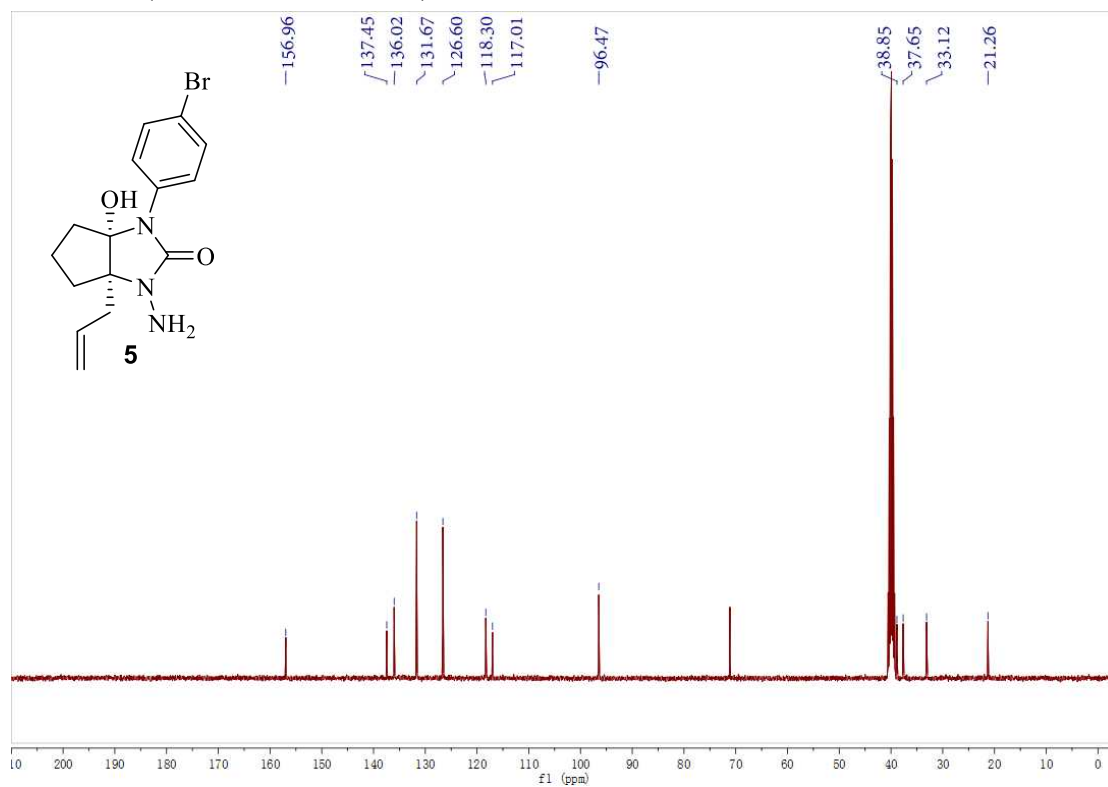

$^1\text{H}$  NMR (400 MHz,  $\text{CDCl}_3$ )

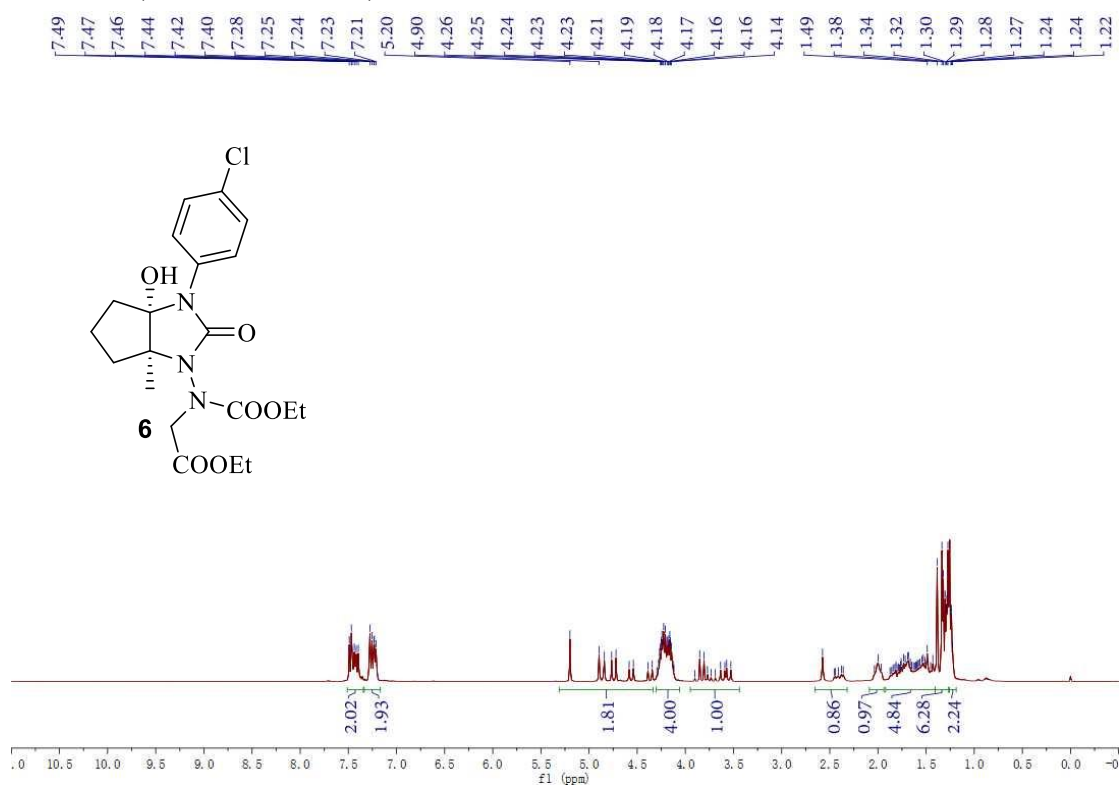

<sup>13</sup>C NMR (100 MHz, CDCl<sub>3</sub>)

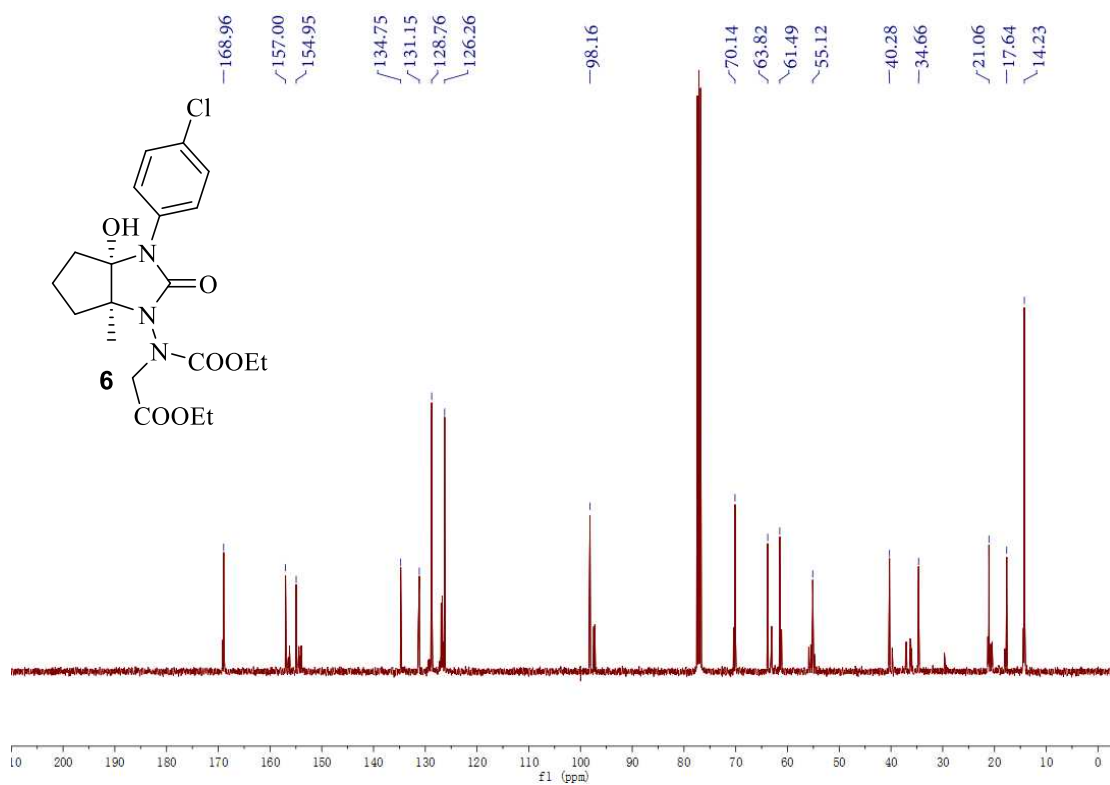

<sup>1</sup>H NMR (400 MHz, DMSO-*d*<sub>6</sub>)

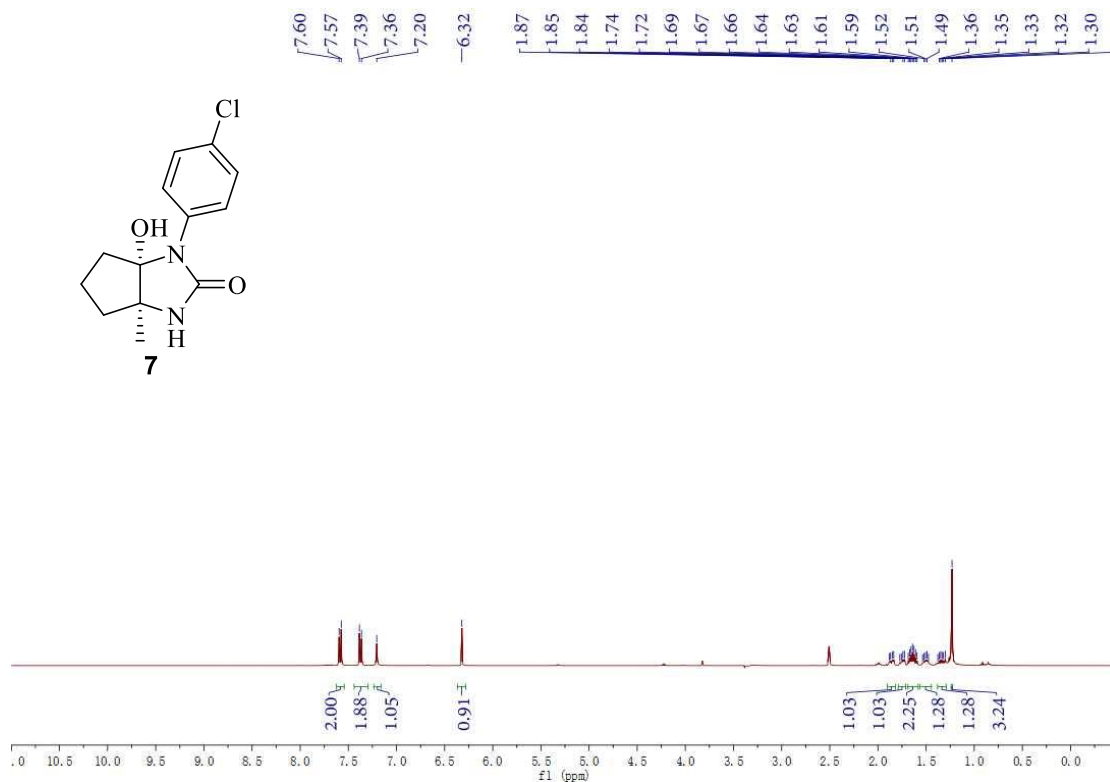



$^{13}\text{C}$  NMR (100 MHz,  $\text{DMSO-}d_6$ )

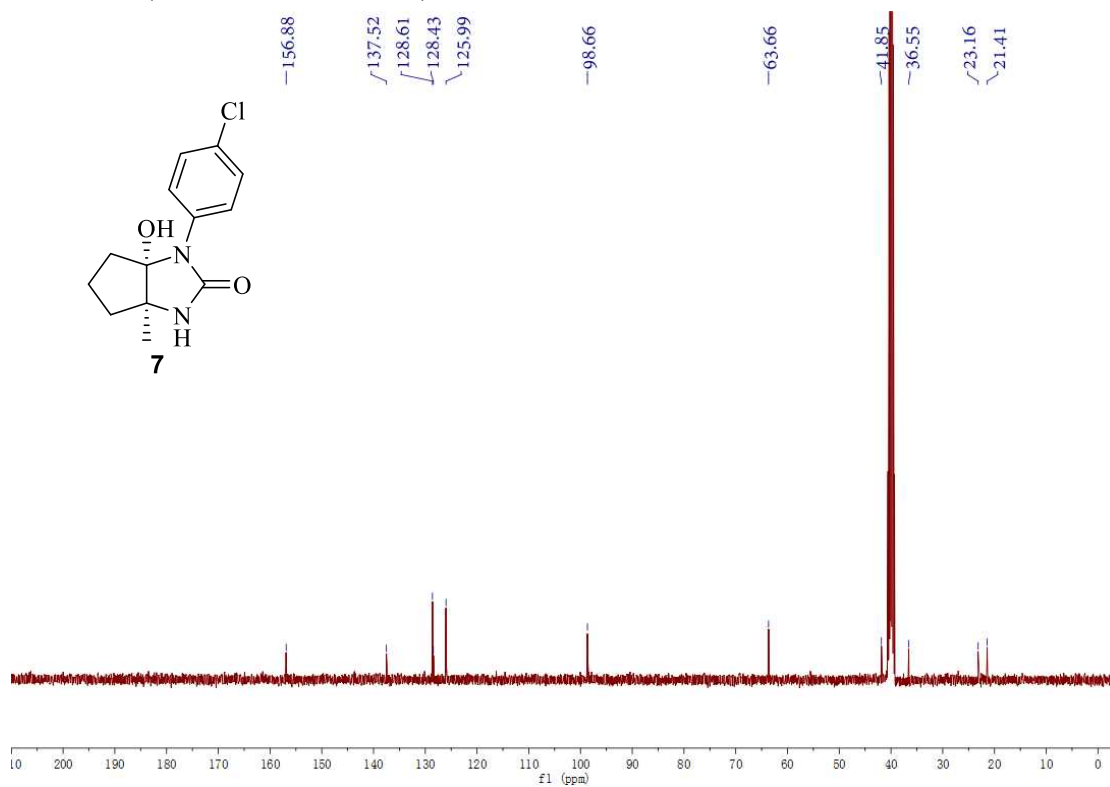

$^1\text{H}$  NMR (400 MHz,  $\text{DMSO-}d_6$ )

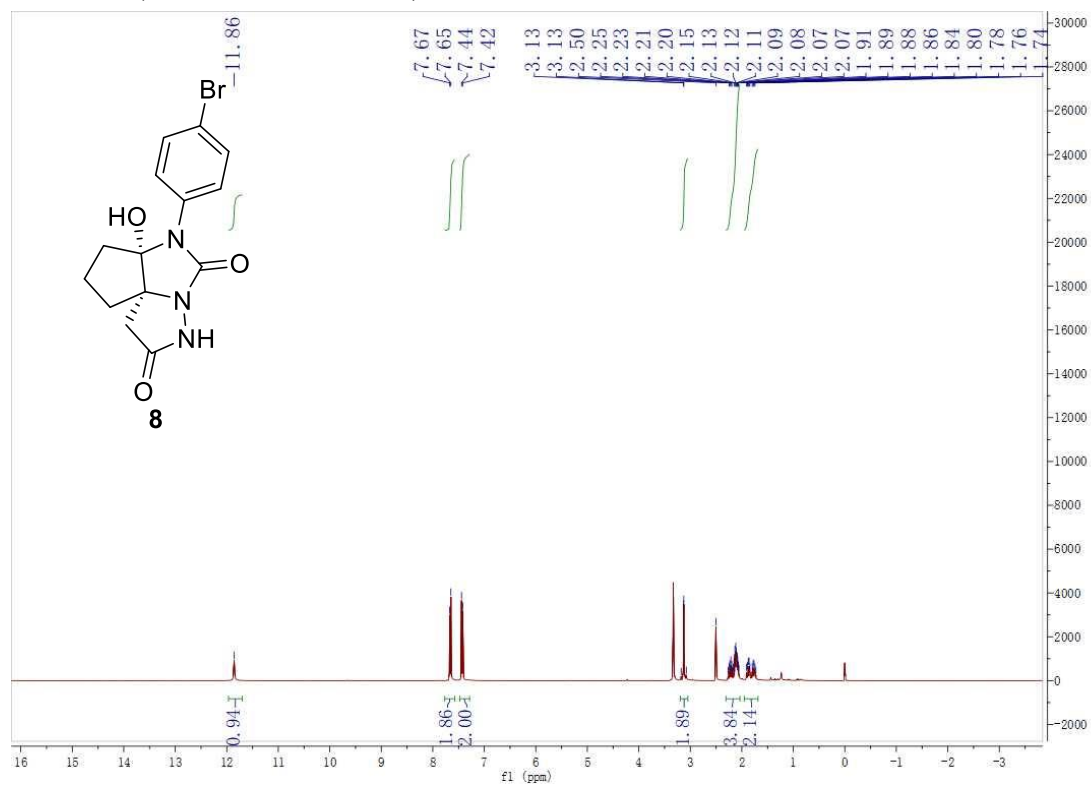

$^{13}\text{C}$  NMR (100 MHz,  $\text{DMSO-}d_6$ )

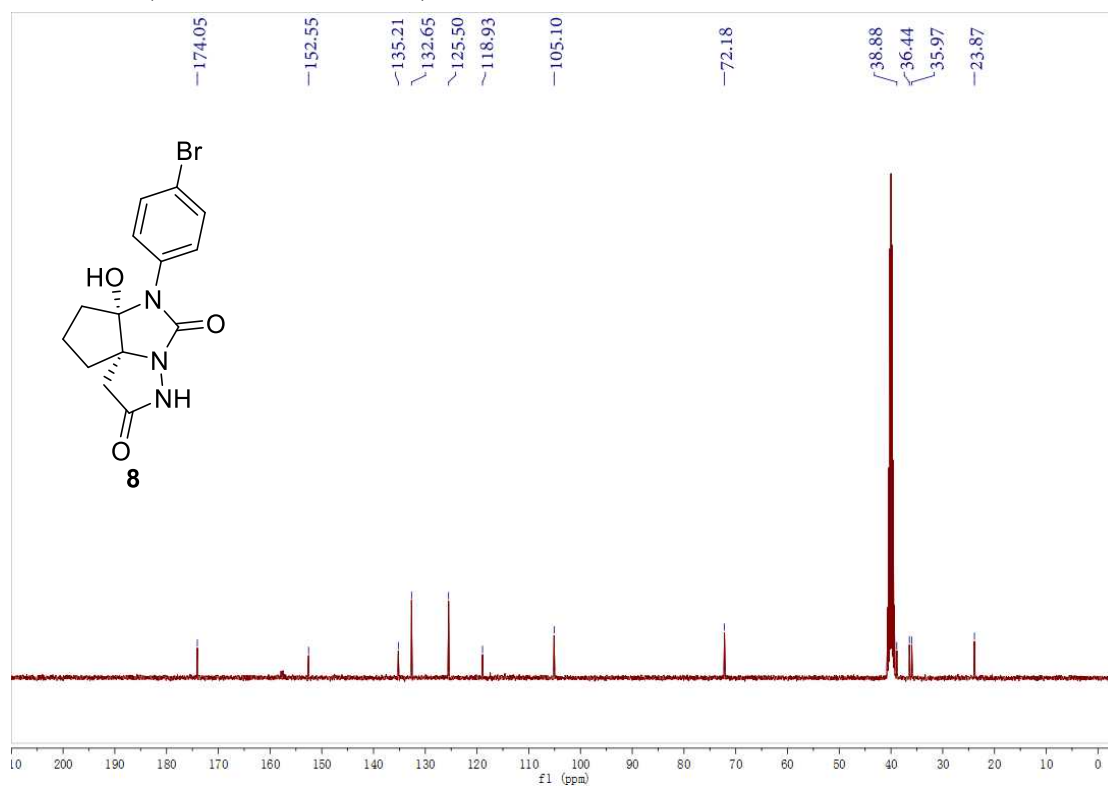

$^1\text{H}$  NMR (400 MHz,  $\text{DMSO-}d_6$ )

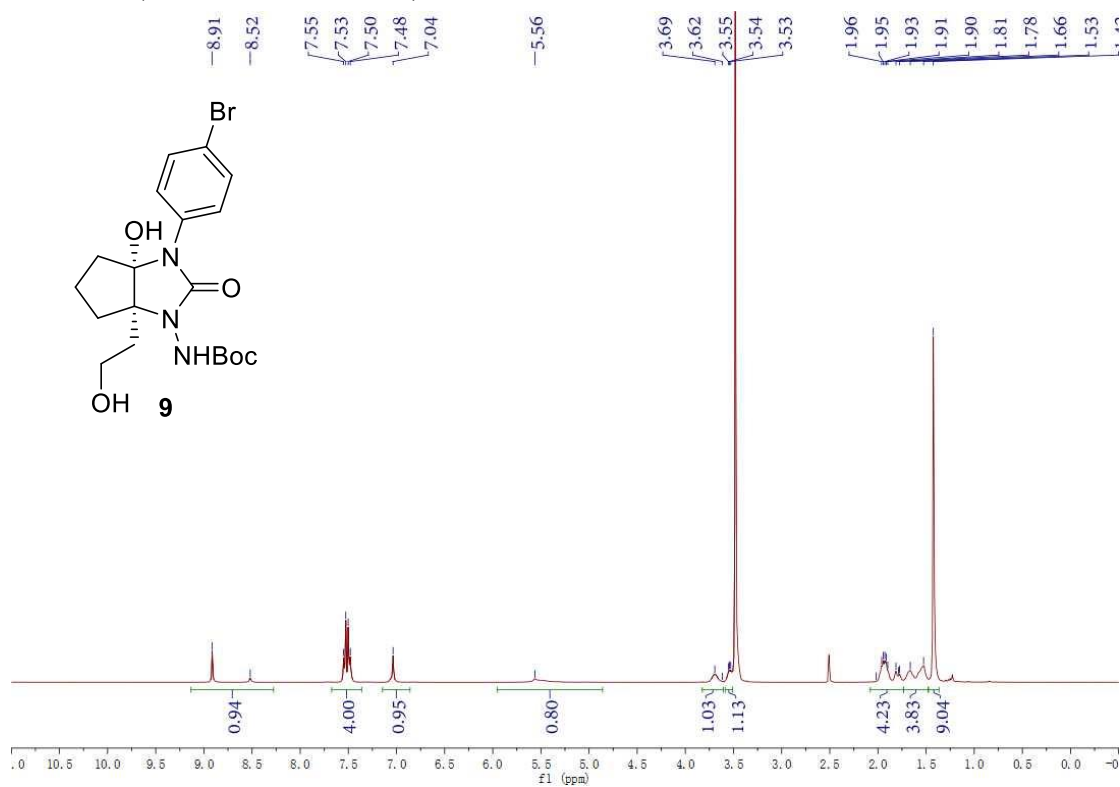

$^{13}\text{C}$  NMR (100 MHz,  $\text{DMSO-}d_6$ )

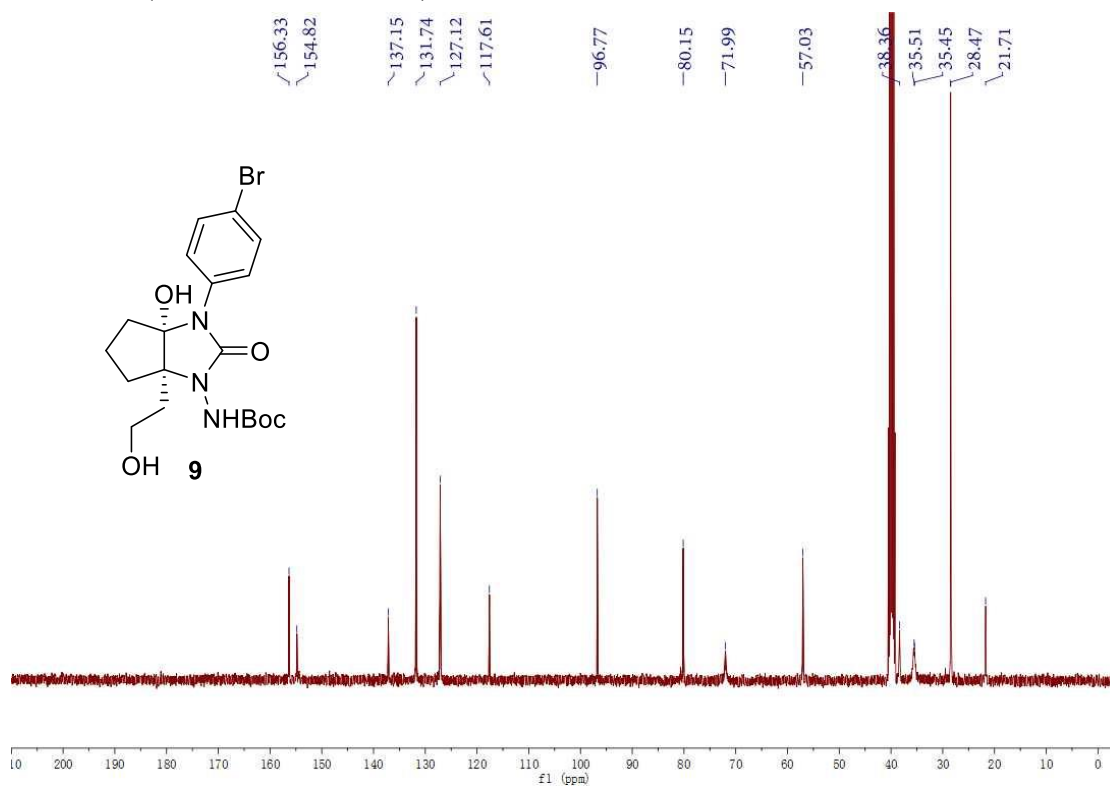

## 6. HPLC spectra

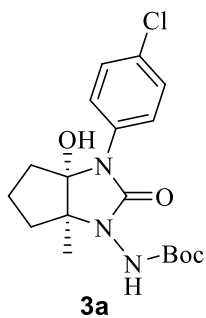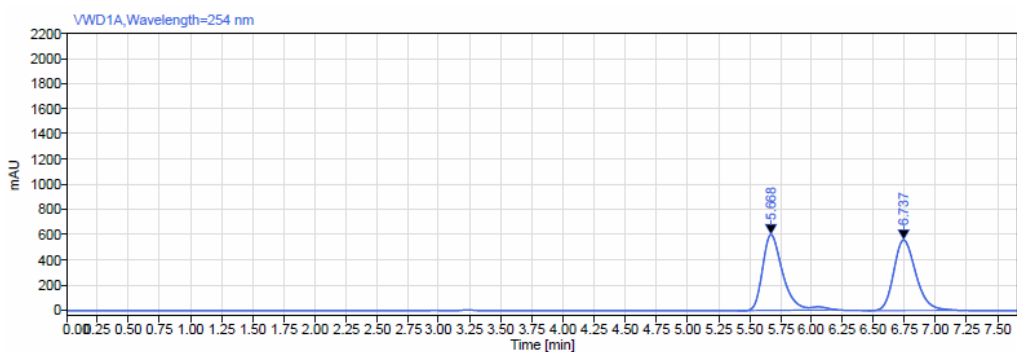

Signal: VWD1A,Wavelength=254 nm

| RT [min]   | Type | Width [min] | Area            | Height | Area% | Name |
|------------|------|-------------|-----------------|--------|-------|------|
| 5.668      | MM m | 0.80        | 6856.74         | 601.47 | 49.72 |      |
| 6.737      | MM m | 0.78        | 6935.21         | 560.49 | 50.28 |      |
| <b>Sum</b> |      |             | <b>13791.95</b> |        |       |      |

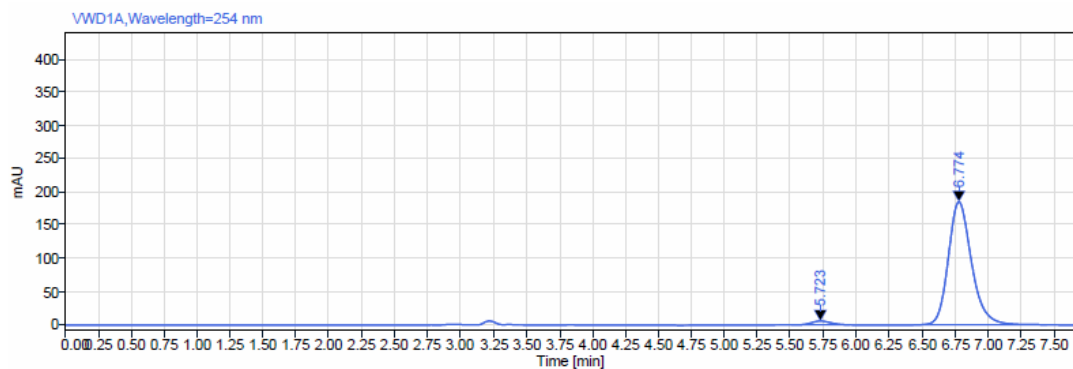

Signal: VWD1A,Wavelength=254 nm

| RT [min]   | Type | Width [min] | Area           | Height | Area% | Name |
|------------|------|-------------|----------------|--------|-------|------|
| 5.723      | MM m | 0.44        | 59.00          | 5.76   | 2.53  |      |
| 6.774      | MM m | 1.01        | 2271.96        | 185.45 | 97.47 |      |
| <b>Sum</b> |      |             | <b>2330.95</b> |        |       |      |

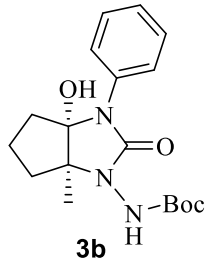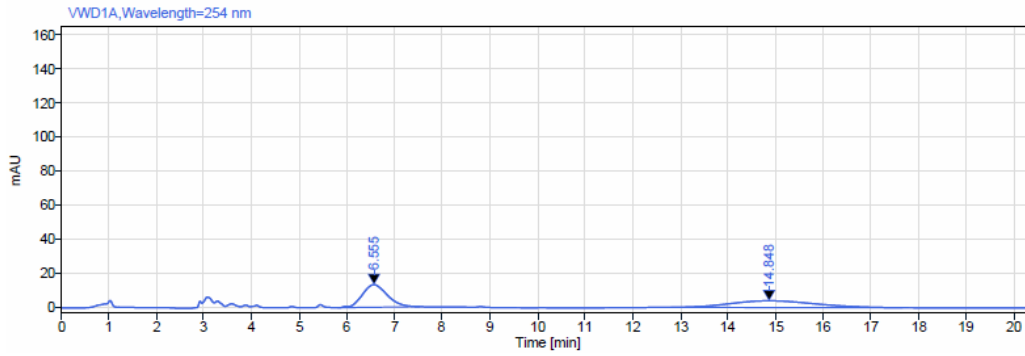

Signal: VWD1A,Wavelength=254 nm

| RT [min]   | Type | Width [min] | Area          | Height | Area% | Name |
|------------|------|-------------|---------------|--------|-------|------|
| 6.555      | MM m | 1.72        | 481.16        | 13.28  | 49.56 |      |
| 14.848     | MB m | 4.86        | 489.71        | 3.94   | 50.44 |      |
| <b>Sum</b> |      |             | <b>970.87</b> |        |       |      |

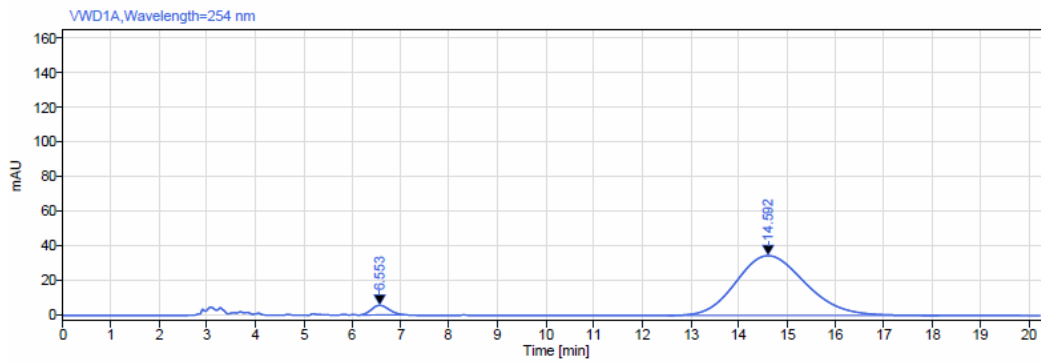

Signal: VWD1A,Wavelength=254 nm

| RT [min]   | Type | Width [min] | Area           | Height | Area% | Name |
|------------|------|-------------|----------------|--------|-------|------|
| 6.553      | MM m | 0.98        | 140.16         | 5.55   | 3.92  |      |
| 14.592     | MM m | 5.61        | 3438.91        | 34.55  | 96.08 |      |
| <b>Sum</b> |      |             | <b>3579.07</b> |        |       |      |

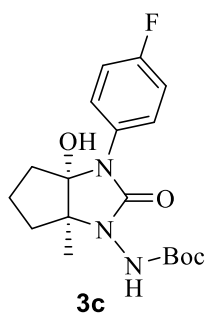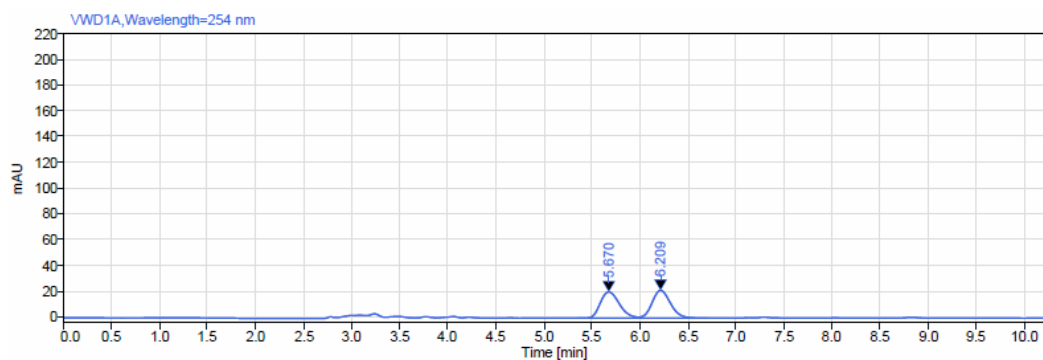

Signal: VWD1A,Wavelength=254 nm

| RT [min]   | Type | Width [min] | Area          | Height | Area% | Name |
|------------|------|-------------|---------------|--------|-------|------|
| 5.670      | MM m | 0.64        | 277.92        | 20.25  | 49.31 |      |
| 6.209      | MM m | 0.72        | 285.65        | 21.50  | 50.69 |      |
| <b>Sum</b> |      |             | <b>563.56</b> |        |       |      |

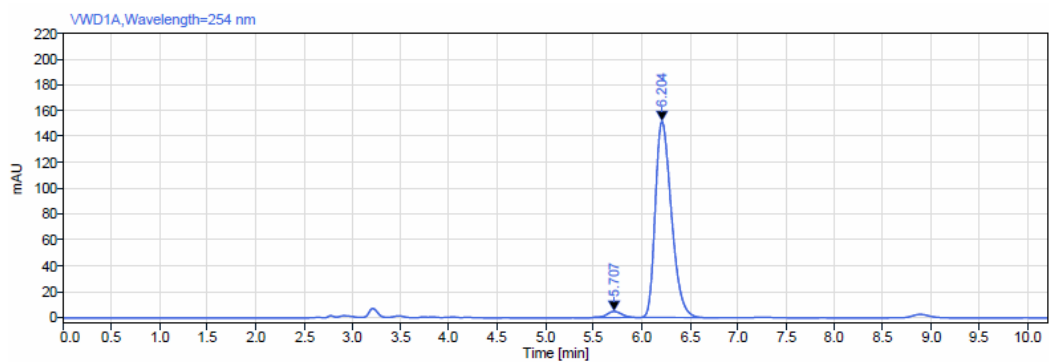

Signal: VWD1A,Wavelength=254 nm

| RT [min]   | Type | Width [min] | Area           | Height | Area% | Name |
|------------|------|-------------|----------------|--------|-------|------|
| 5.707      | MM m | 0.45        | 52.13          | 4.76   | 2.88  |      |
| 6.204      | MM m | 0.88        | 1760.03        | 151.59 | 97.12 |      |
| <b>Sum</b> |      |             | <b>1812.15</b> |        |       |      |

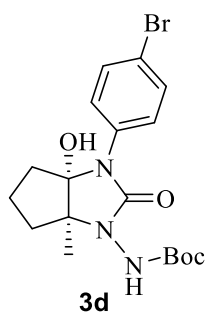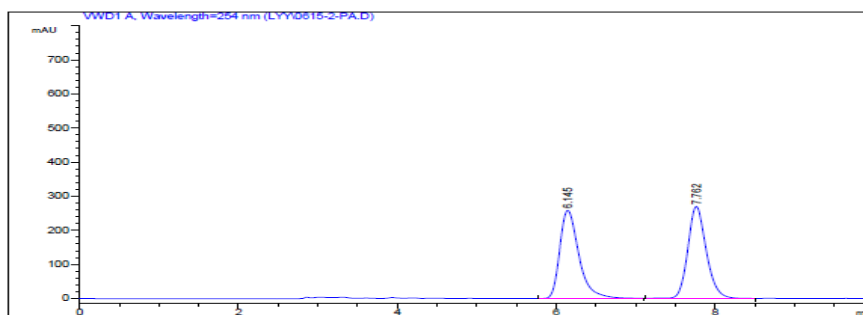

=====  
Area Percent Report  
=====

Sorted By : Signal  
Multiplier : 1.0000  
Dilution : 1.0000  
Use Multiplier & Dilution Factor with ISTDs

Signal 1: VWD1 A, Wavelength=254 nm

| Peak #   | RetTime [min] | Type | Width [min] | Area mAU *s | Height [mAU] | Area %  |
|----------|---------------|------|-------------|-------------|--------------|---------|
| 1        | 6.145         | VB   | 0.2574      | 4348.86494  | 288.86021    | 49.8473 |
| 2        | 7.762         | BB   | 0.2459      | 4375.20215  | 269.90564    | 50.1527 |
| Totals : |               |      |             | 8723.76709  | 528.46585    |         |

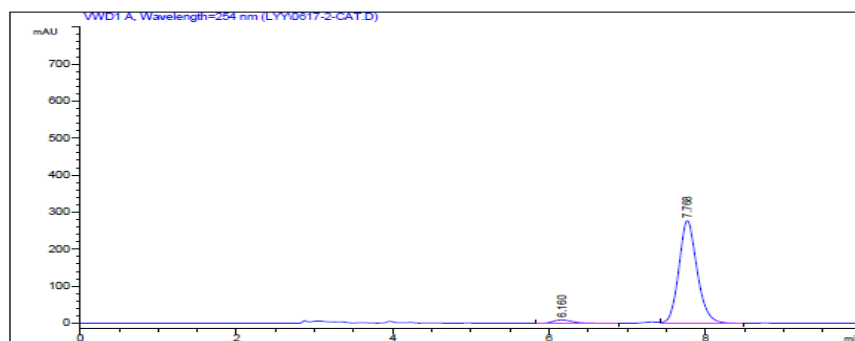

=====  
Area Percent Report  
=====

Sorted By : Signal  
Multiplier : 1.0000  
Dilution : 1.0000  
Use Multiplier & Dilution Factor with ISTDs

Signal 1: VWD1 A, Wavelength=254 nm

| Peak #   | RetTime [min] | Type | Width [min] | Area mAU *s | Height [mAU] | Area %  |
|----------|---------------|------|-------------|-------------|--------------|---------|
| 1        | 6.160         | VB   | 0.2746      | 161.96577   | 9.03867      | 3.4739  |
| 2        | 7.768         | VB   | 0.2447      | 4500.53271  | 277.29105    | 96.5262 |
| Totals : |               |      |             | 4662.49849  | 286.32971    |         |

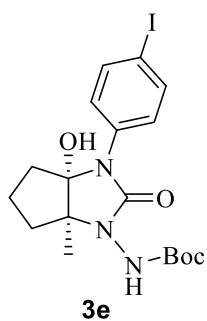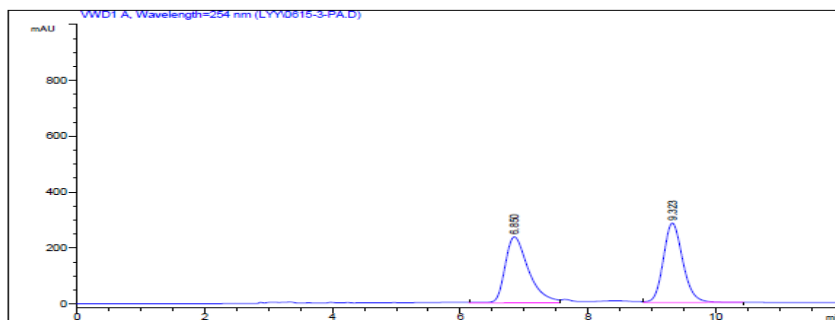

=====  
Area Percent Report  
=====

Sorted By : Signal  
Multiplier : 1.0000  
Dilution : 1.0000  
Use Multiplier & Dilution Factor with ISTDs

Signal 1: VWD1 A, Wavelength=254 nm

| Peak # | RetTime [min] | Type | Width [min] | Area mAU   | Area %  | Height [mAU] | Area %  |
|--------|---------------|------|-------------|------------|---------|--------------|---------|
| 1      | 6.850         | VV   | 0.3879      | 6057.75195 | 50.1362 | 236.32777    | 50.1362 |
| 2      | 9.323         | VB   | 0.3273      | 6024.84570 | 49.8638 | 284.27234    | 49.8638 |

Totals : 1.20826e4 520.60011

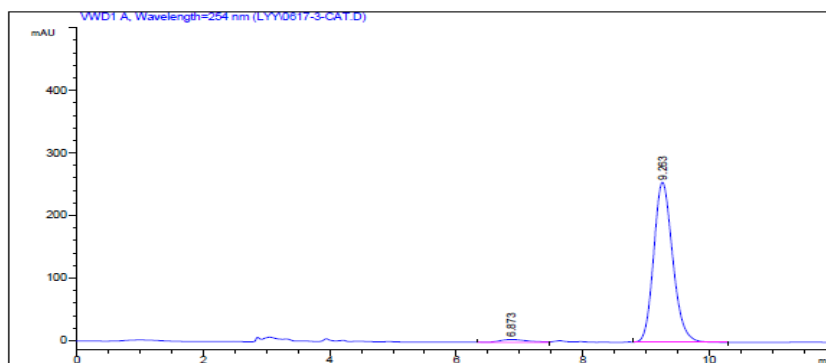

=====  
Area Percent Report  
=====

Sorted By : Signal  
Multiplier : 1.0000  
Dilution : 1.0000  
Use Multiplier & Dilution Factor with ISTDs

Signal 1: VWD1 A, Wavelength=254 nm

| Peak # | RetTime [min] | Type | Width [min] | Area mAU   | Area %  | Height [mAU] | Area %  |
|--------|---------------|------|-------------|------------|---------|--------------|---------|
| 1      | 6.873         | BV   | 0.4611      | 134.71104  | 2.4822  | 4.44722      | 2.4822  |
| 2      | 9.263         | VB   | 0.3229      | 5358.76270 | 97.5178 | 265.91953    | 97.5178 |

Totals : 5493.47374 260.36674



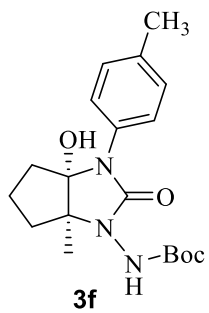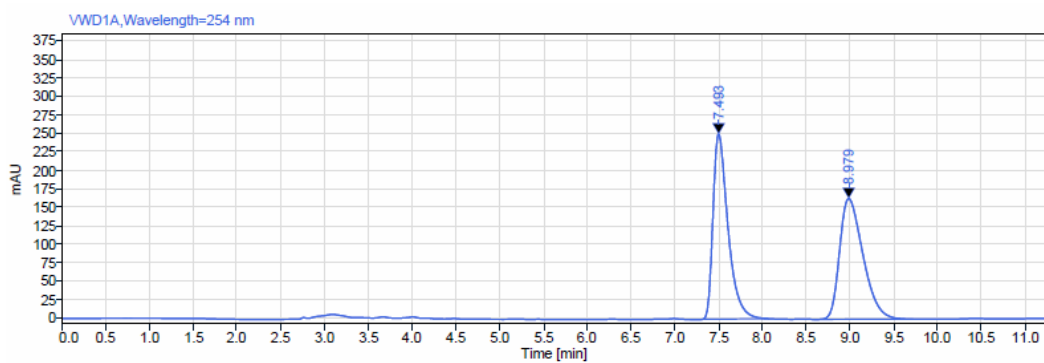

Signal: VWD1A,Wavelength=254 nm

| RT [min]   | Type | Width [min] | Area           | Height | Area% | Name |
|------------|------|-------------|----------------|--------|-------|------|
| 7.493      | MM m | 0.90        | 2978.27        | 250.81 | 49.54 |      |
| 8.979      | MM m | 1.14        | 3033.66        | 163.61 | 50.46 |      |
| <b>Sum</b> |      |             | <b>6011.93</b> |        |       |      |

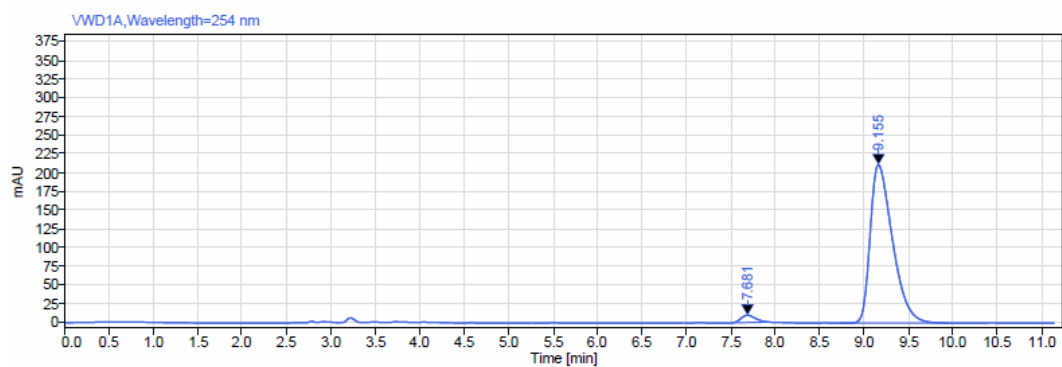

Signal: VWD1A,Wavelength=254 nm

| RT [min]   | Type | Width [min] | Area           | Height | Area% | Name |
|------------|------|-------------|----------------|--------|-------|------|
| 7.681      | MM m | 0.41        | 110.39         | 9.80   | 2.91  |      |
| 9.155      | MM m | 1.22        | 3685.60        | 211.57 | 97.09 |      |
| <b>Sum</b> |      |             | <b>3795.99</b> |        |       |      |

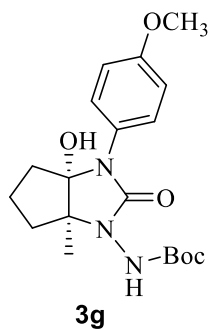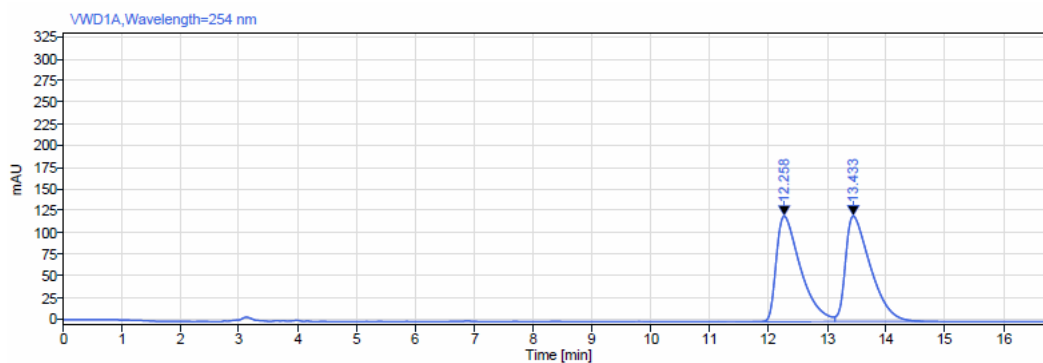

Signal: VWD1A,Wavelength=254 nm

| RT [min]   | Type | Width [min] | Area           | Height | Area% | Name |
|------------|------|-------------|----------------|--------|-------|------|
| 12.258     | BM m | 1.40        | 3483.32        | 121.51 | 49.38 |      |
| 13.433     | MM m | 1.51        | 3570.85        | 121.42 | 50.62 |      |
| <b>Sum</b> |      |             | <b>7054.17</b> |        |       |      |

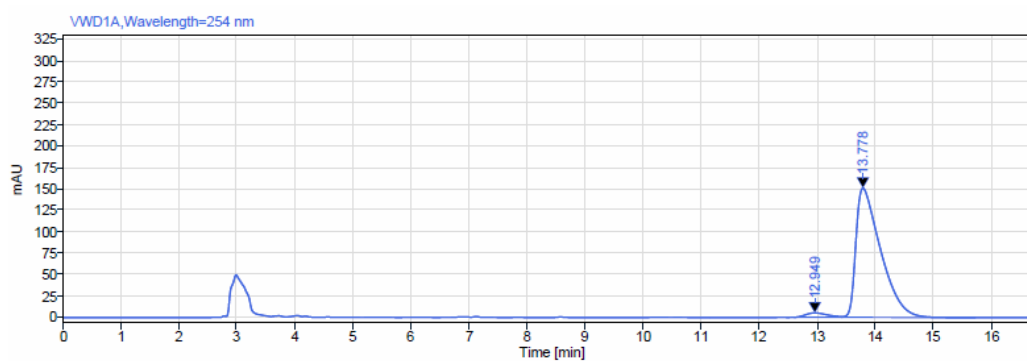

Signal: VWD1A,Wavelength=254 nm

| RT [min]   | Type | Width [min] | Area           | Height | Area% | Name |
|------------|------|-------------|----------------|--------|-------|------|
| 12.949     | MM m | 0.83        | 137.02         | 5.20   | 2.97  |      |
| 13.778     | MB m | 2.30        | 4475.97        | 151.29 | 97.03 |      |
| <b>Sum</b> |      |             | <b>4612.99</b> |        |       |      |

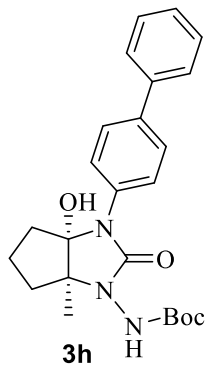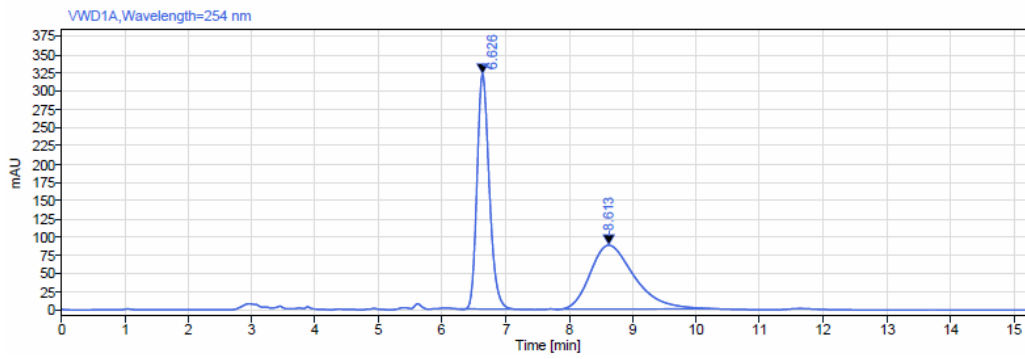

Signal: VWD1A,Wavelength=254 nm

| RT [min]   | Type | Width [min] | Area           | Height | Area% | Name |
|------------|------|-------------|----------------|--------|-------|------|
| 6.626      | MM m | 1.02        | 4290.86        | 321.72 | 50.49 |      |
| 8.613      | MM m | 2.51        | 4208.17        | 87.54  | 49.51 |      |
| <b>Sum</b> |      |             | <b>8499.03</b> |        |       |      |

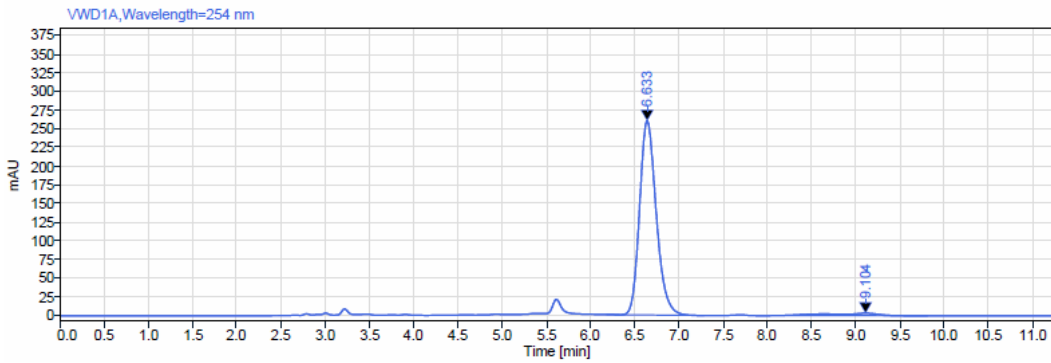

Signal: VWD1A,Wavelength=254 nm

| RT [min]   | Type | Width [min] | Area           | Height | Area% | Name |
|------------|------|-------------|----------------|--------|-------|------|
| 6.633      | MM m | 1.10        | 3413.22        | 260.14 | 96.41 |      |
| 9.104      | MM m | 1.62        | 126.98         | 3.22   | 3.59  |      |
| <b>Sum</b> |      |             | <b>3540.20</b> |        |       |      |

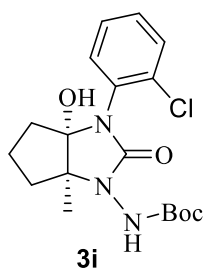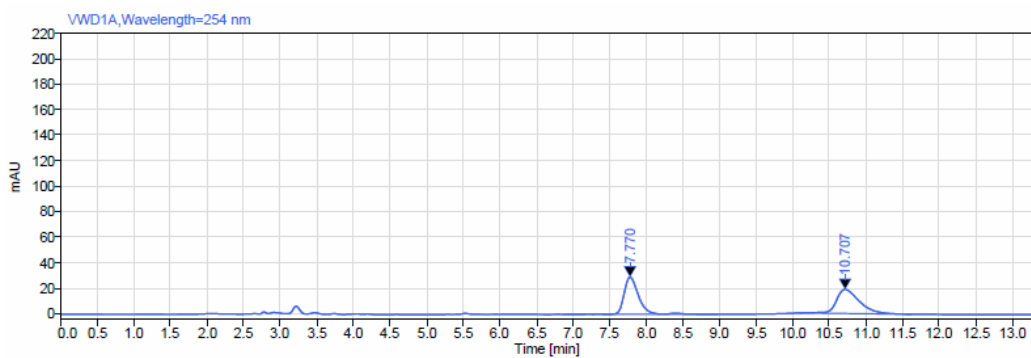

Signal: VWD1A,Wavelength=254 nm

| RT [min]   | Type | Width [min] | Area          | Height | Area% | Name |
|------------|------|-------------|---------------|--------|-------|------|
| 7.770      | MM m | 2.12        | 412.95        | 29.32  | 50.18 |      |
| 10.707     | MM m | 1.52        | 409.91        | 18.82  | 49.82 |      |
| <b>Sum</b> |      |             | <b>822.85</b> |        |       |      |

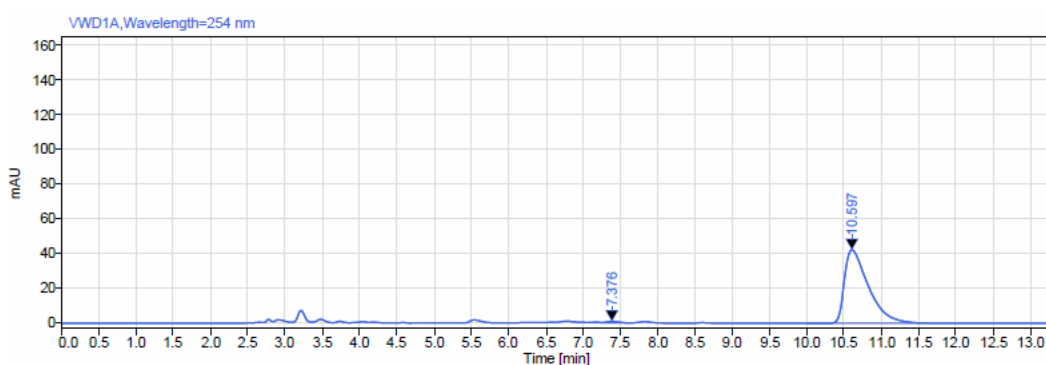

Signal: VWD1A,Wavelength=254 nm

| RT [min]   | Type | Width [min] | Area          | Height | Area% | Name |
|------------|------|-------------|---------------|--------|-------|------|
| 7.376      | MM m | 0.57        | 10.87         | 0.92   | 1.14  |      |
| 10.597     | MM m | 1.62        | 944.96        | 42.42  | 98.86 |      |
| <b>Sum</b> |      |             | <b>955.84</b> |        |       |      |

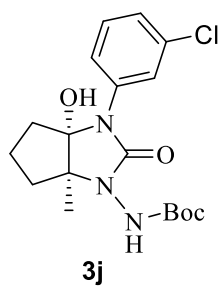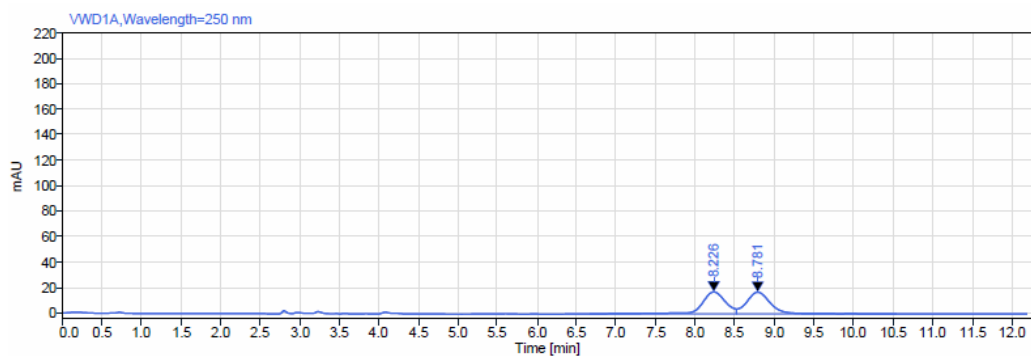

Signal: VWD1A,Wavelength=250 nm

| RT [min]   | Type | Width [min] | Area          | Height | Area% | Name |
|------------|------|-------------|---------------|--------|-------|------|
| 8.226      | MM m | 1.85        | 362.84        | 17.26  | 50.10 |      |
| 8.781      | MM m | 2.02        | 361.38        | 17.11  | 49.90 |      |
| <b>Sum</b> |      |             | <b>724.22</b> |        |       |      |

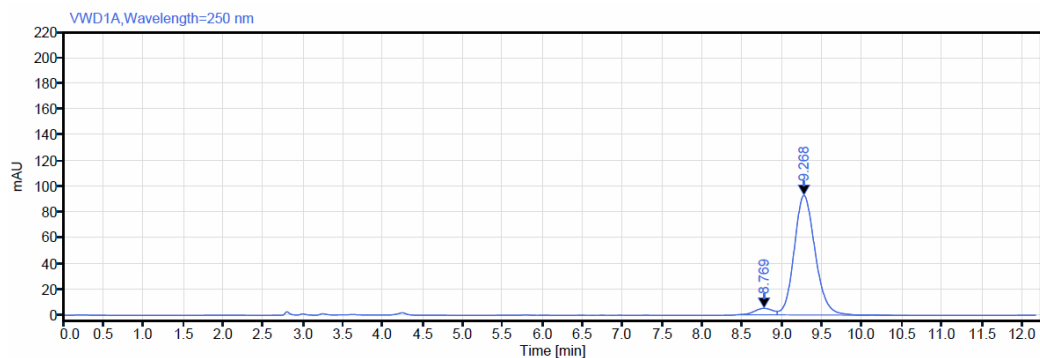

Signal: VWD1A,Wavelength=250 nm

| RT [min]   | Type | Width [min] | Area           | Height | Area% | Name |
|------------|------|-------------|----------------|--------|-------|------|
| 8.769      | MM m | 0.49        | 79.35          | 5.00   | 4.46  |      |
| 9.268      | MM m | 1.64        | 1698.95        | 92.83  | 95.54 |      |
| <b>Sum</b> |      |             | <b>1778.30</b> |        |       |      |

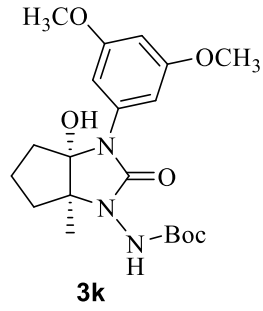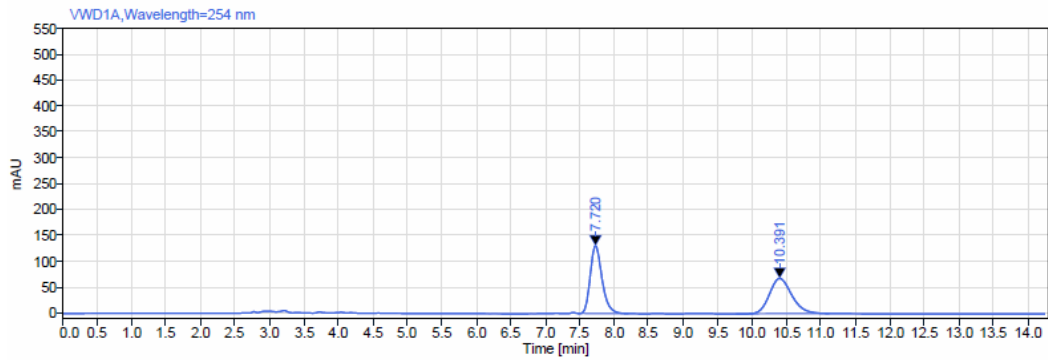

Signal: VWD1A,Wavelength=254 nm

| RT [min]   | Type | Width [min] | Area           | Height | Area% | Name |
|------------|------|-------------|----------------|--------|-------|------|
| 7.720      | MM m | 0.74        | 1554.41        | 130.42 | 50.44 |      |
| 10.391     | MM m | 1.35        | 1527.53        | 68.00  | 49.56 |      |
| <b>Sum</b> |      |             | <b>3081.94</b> |        |       |      |

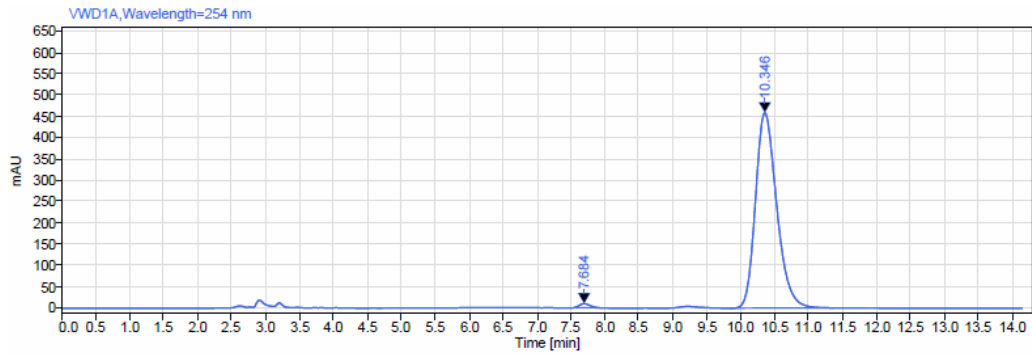

Signal: VWD1A,Wavelength=254 nm

| RT [min]   | Type | Width [min] | Area            | Height | Area% | Name |
|------------|------|-------------|-----------------|--------|-------|------|
| 7.684      | MM m | 0.39        | 105.31          | 9.66   | 1.04  |      |
| 10.346     | MM m | 1.51        | 9980.48         | 459.31 | 98.96 |      |
| <b>Sum</b> |      |             | <b>10085.79</b> |        |       |      |

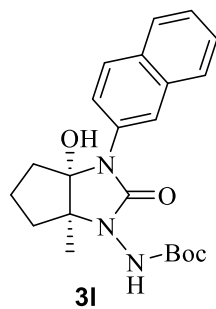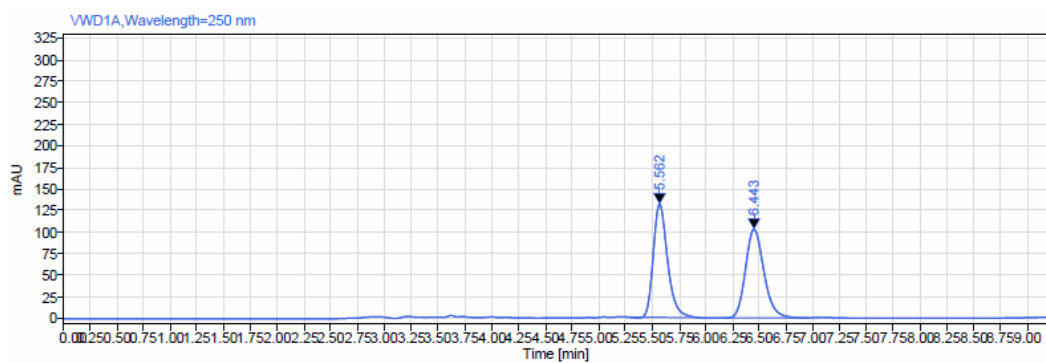

Signal: VWD1A, Wavelength=250 nm

| RT [min]   | Type | Width [min] | Area           | Height | Area% | Name |
|------------|------|-------------|----------------|--------|-------|------|
| 5.562      | MM m | 0.71        | 1208.48        | 131.43 | 49.58 |      |
| 6.443      | MM m | 0.80        | 1229.10        | 102.91 | 50.42 |      |
| <b>Sum</b> |      |             | <b>2437.58</b> |        |       |      |

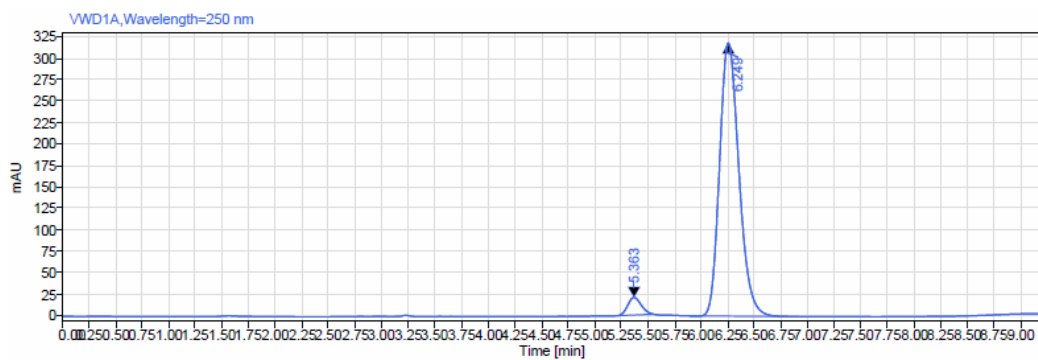

Signal: VWD1A, Wavelength=250 nm

| RT [min]   | Type | Width [min] | Area           | Height | Area% | Name |
|------------|------|-------------|----------------|--------|-------|------|
| 5.363      | MM m | 0.33        | 178.55         | 20.42  | 4.24  |      |
| 6.249      | MM m | 1.02        | 4028.62        | 318.85 | 95.76 |      |
| <b>Sum</b> |      |             | <b>4207.17</b> |        |       |      |

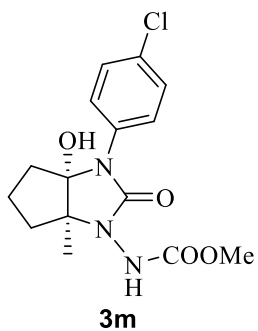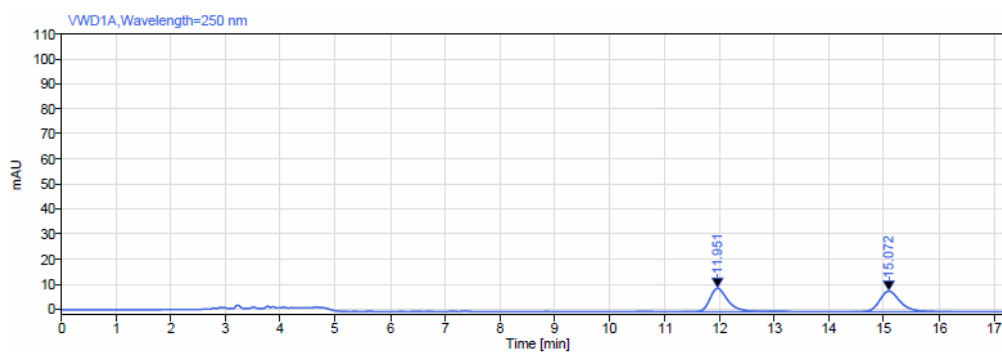

Signal: VWD1A,Wavelength=250 nm

| RT [min]   | Type | Width [min] | Area          | Height | Area% | Name |
|------------|------|-------------|---------------|--------|-------|------|
| 11.951     | MM m | 1.88        | 209.62        | 9.30   | 49.88 |      |
| 15.072     | BB   | 1.79        | 210.66        | 8.16   | 50.12 |      |
| <b>Sum</b> |      |             | <b>420.29</b> |        |       |      |

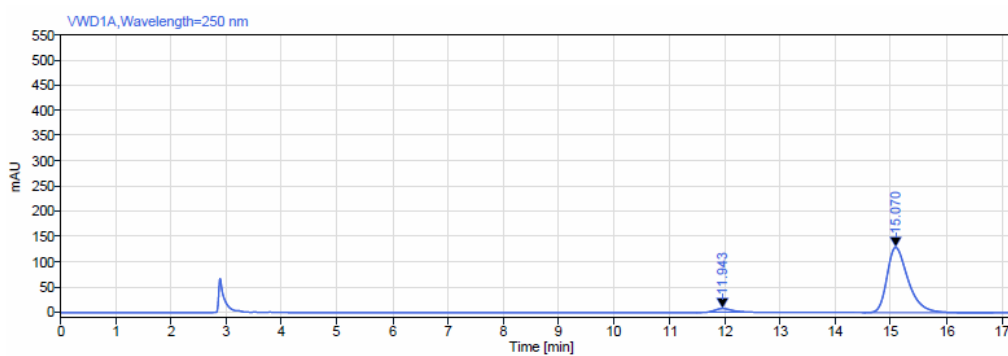

Signal: VWD1A,Wavelength=250 nm

| RT [min]   | Type | Width [min] | Area           | Height | Area% | Name |
|------------|------|-------------|----------------|--------|-------|------|
| 11.943     | BM m | 0.65        | 128.48         | 6.71   | 3.64  |      |
| 15.070     | BBA  | 2.33        | 3405.63        | 129.23 | 96.36 |      |
| <b>Sum</b> |      |             | <b>3534.11</b> |        |       |      |



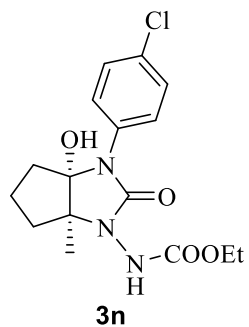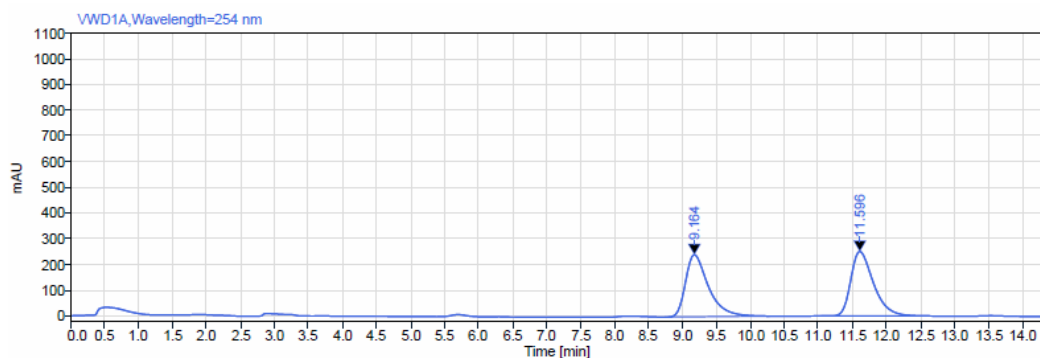

Signal: VWD1A,Wavelength=254 nm

| RT [min]   | Type | Width [min] | Area            | Height | Area% | Name |
|------------|------|-------------|-----------------|--------|-------|------|
| 9.164      | MM m | 1.54        | 5652.65         | 241.42 | 49.32 |      |
| 11.596     | MM m | 1.59        | 5808.45         | 250.79 | 50.68 |      |
| <b>Sum</b> |      |             | <b>11461.11</b> |        |       |      |

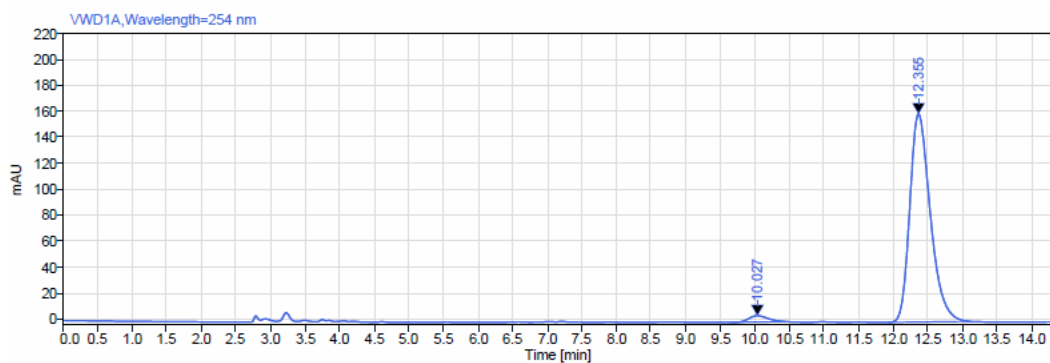

Signal: VWD1A,Wavelength=254 nm

| RT [min]   | Type | Width [min] | Area           | Height | Area% | Name |
|------------|------|-------------|----------------|--------|-------|------|
| 10.027     | MM m | 0.81        | 93.16          | 4.86   | 2.75  |      |
| 12.355     | MM m | 1.18        | 3296.94        | 160.08 | 97.25 |      |
| <b>Sum</b> |      |             | <b>3390.10</b> |        |       |      |

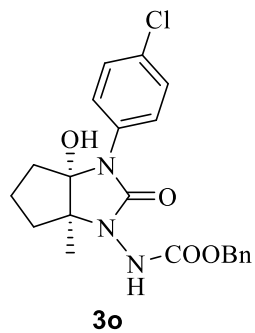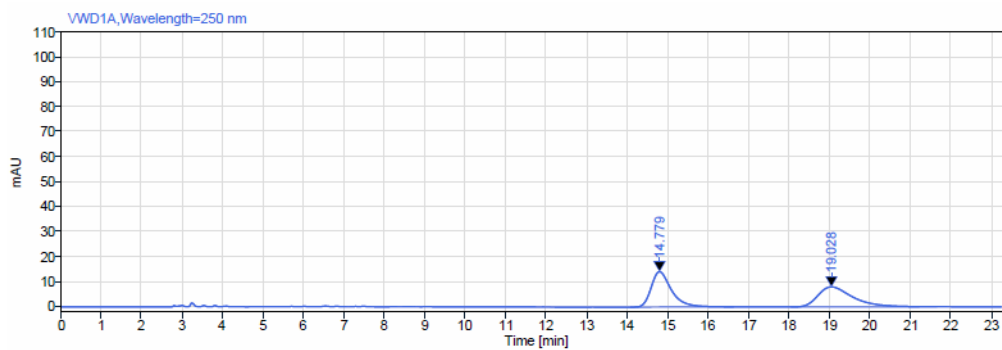

Signal: VWD1A,Wavelength=250 nm

| RT [min]   | Type | Width [min] | Area          | Height | Area% | Name |
|------------|------|-------------|---------------|--------|-------|------|
| 14.779     | BB   | 2.55        | 491.98        | 14.15  | 50.57 |      |
| 19.028     | BB   | 3.61        | 480.83        | 8.03   | 49.43 |      |
| <b>Sum</b> |      |             | <b>972.81</b> |        |       |      |

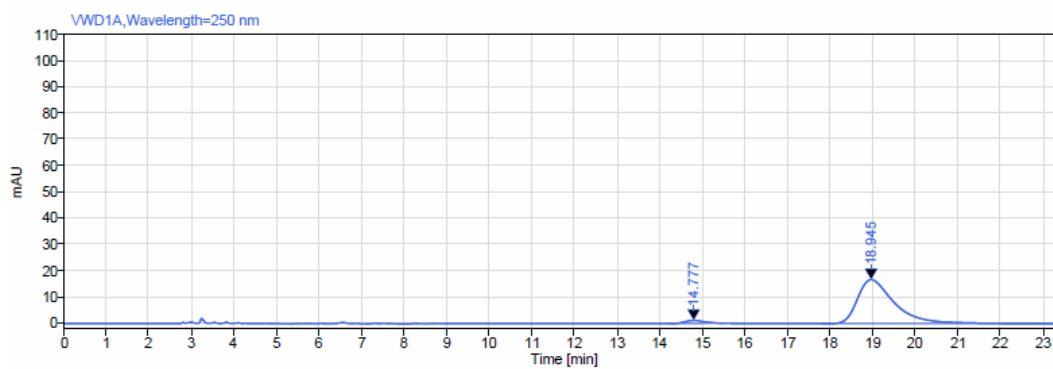

Signal: VWD1A,Wavelength=250 nm

| RT [min]   | Type | Width [min] | Area           | Height | Area% | Name |
|------------|------|-------------|----------------|--------|-------|------|
| 14.777     | BM m | 1.32        | 36.52          | 1.14   | 3.49  |      |
| 18.945     | BBA  | 5.46        | 1009.75        | 16.72  | 96.51 |      |
| <b>Sum</b> |      |             | <b>1046.27</b> |        |       |      |

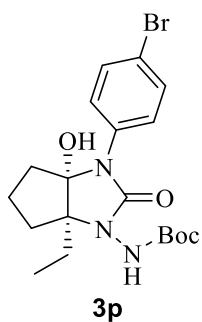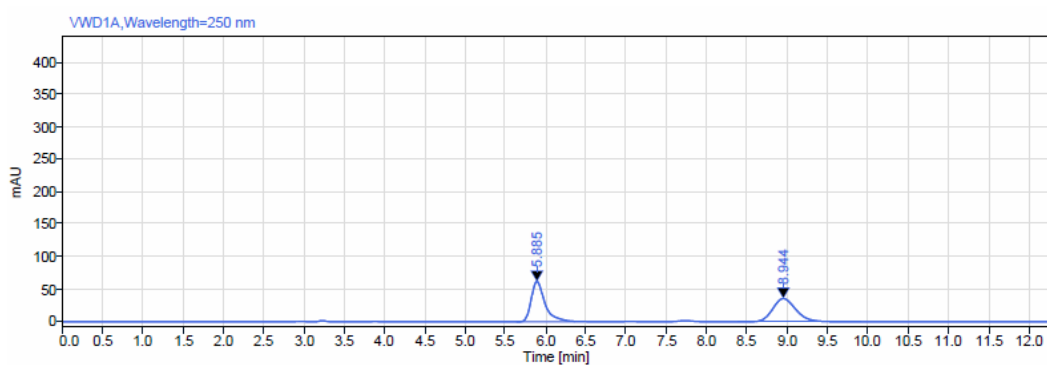

Signal: VWD1A,Wavelength=250 nm

| RT [min]   | Type | Width [min] | Area           | Height | Area% | Name |
|------------|------|-------------|----------------|--------|-------|------|
| 5.885      | MM m | 0.84        | 739.60         | 61.97  | 50.60 |      |
| 8.944      | MM m | 1.52        | 722.18         | 35.91  | 49.40 |      |
| <b>Sum</b> |      |             | <b>1461.78</b> |        |       |      |

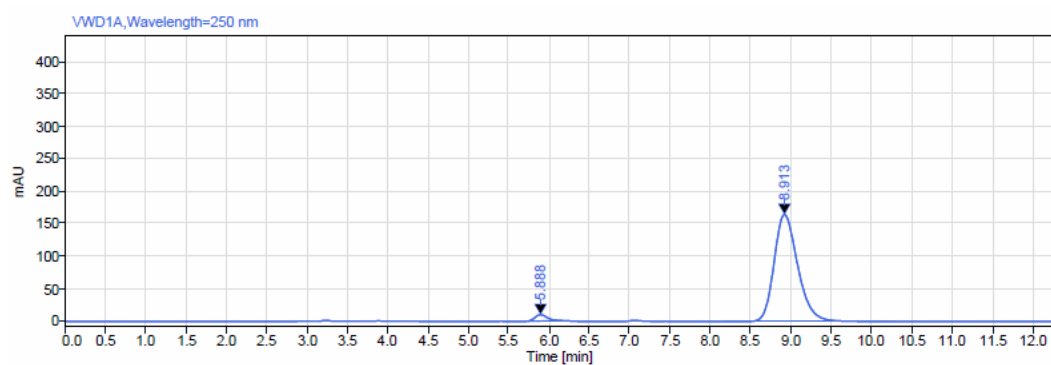

Signal: VWD1A,Wavelength=250 nm

| RT [min]   | Type | Width [min] | Area           | Height | Area% | Name |
|------------|------|-------------|----------------|--------|-------|------|
| 5.888      | MM m | 0.44        | 103.31         | 9.76   | 2.98  |      |
| 8.913      | MM m | 2.10        | 3361.54        | 164.88 | 97.02 |      |
| <b>Sum</b> |      |             | <b>3464.85</b> |        |       |      |

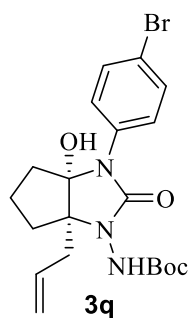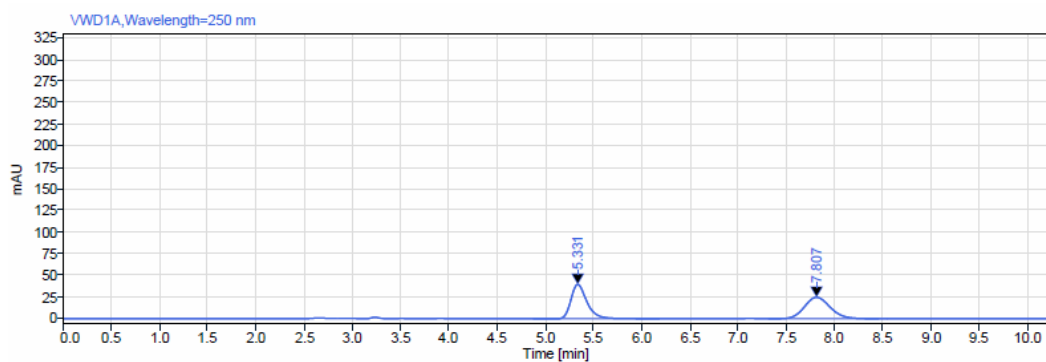

Signal: VWD1A,Wavelength=250 nm

| RT [min]   | Type | Width [min] | Area          | Height | Area% | Name |
|------------|------|-------------|---------------|--------|-------|------|
| 5.331      | MM m | 1.31        | 459.74        | 39.89  | 49.89 |      |
| 7.807      | MM m | 1.15        | 461.84        | 24.85  | 50.11 |      |
| <b>Sum</b> |      |             | <b>921.58</b> |        |       |      |

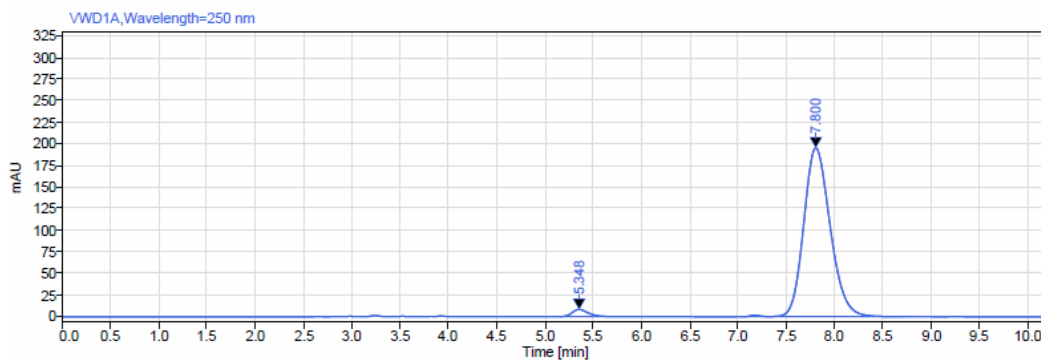

Signal: VWD1A,Wavelength=250 nm

| RT [min]   | Type | Width [min] | Area           | Height | Area% | Name |
|------------|------|-------------|----------------|--------|-------|------|
| 5.348      | MM m | 0.49        | 92.02          | 8.21   | 2.40  |      |
| 7.800      | MM m | 1.70        | 3740.12        | 195.76 | 97.60 |      |
| <b>Sum</b> |      |             | <b>3832.14</b> |        |       |      |

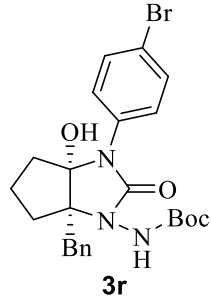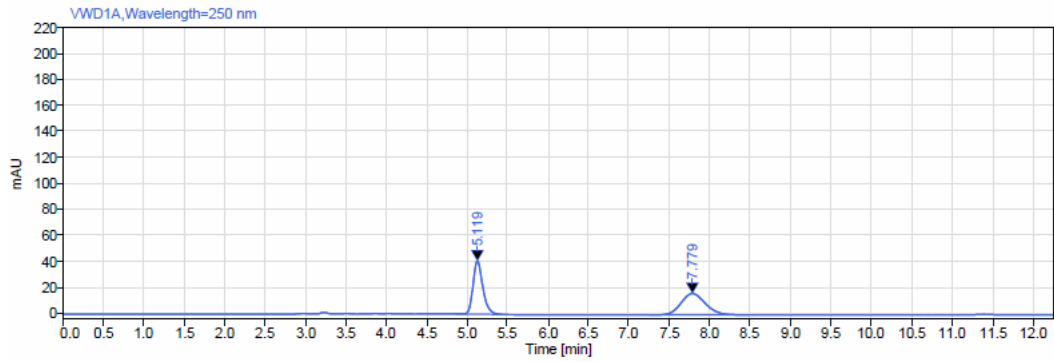

Signal: VWD1A,Wavelength=250 nm

| RT [min]   | Type | Width [min] | Area          | Height | Area% | Name |
|------------|------|-------------|---------------|--------|-------|------|
| 5.119      | MM m | 0.58        | 345.18        | 40.84  | 50.12 |      |
| 7.779      | MM m | 1.24        | 343.55        | 16.38  | 49.88 |      |
| <b>Sum</b> |      |             | <b>688.73</b> |        |       |      |

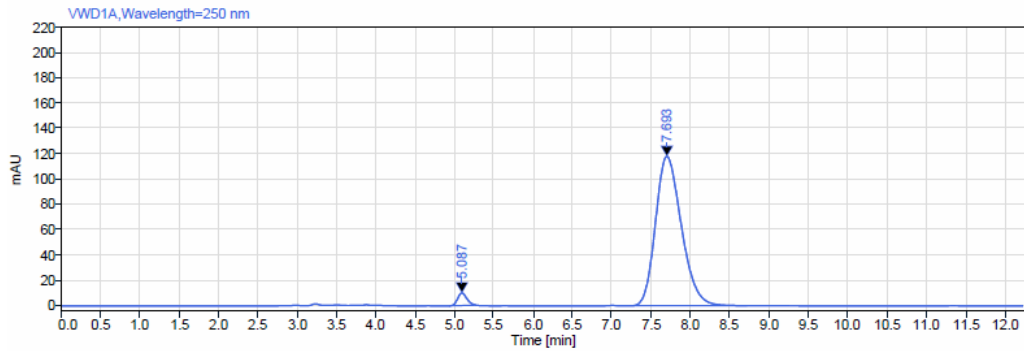

Signal: VWD1A,Wavelength=250 nm

| RT [min]   | Type | Width [min] | Area           | Height | Area% | Name |
|------------|------|-------------|----------------|--------|-------|------|
| 5.087      | MM m | 0.34        | 80.38          | 9.94   | 2.90  |      |
| 7.693      | MM m | 1.65        | 2689.66        | 117.85 | 97.10 |      |
| <b>Sum</b> |      |             | <b>2770.04</b> |        |       |      |

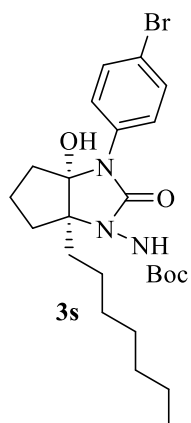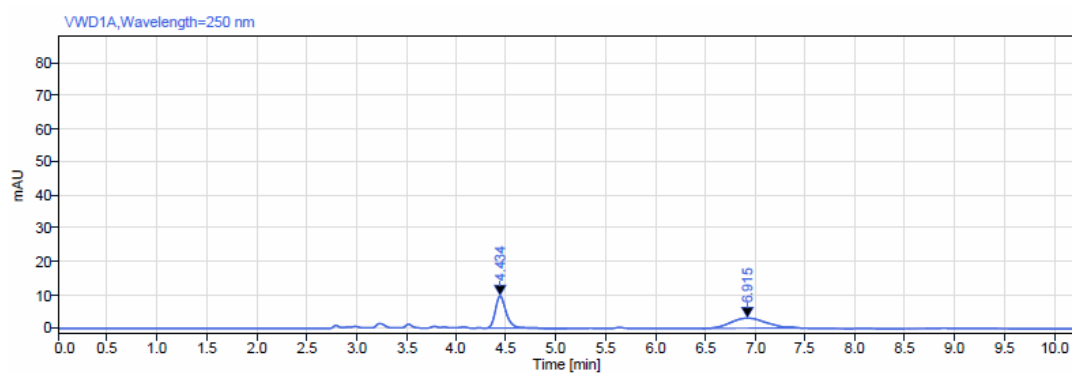

Signal: VWD1A,Wavelength=250 nm

| RT [min]   | Type | Width [min] | Area          | Height | Area% | Name |
|------------|------|-------------|---------------|--------|-------|------|
| 4.434      | MM m | 0.96        | 74.26         | 9.69   | 49.25 |      |
| 6.915      | MM m | 1.02        | 76.52         | 3.04   | 50.75 |      |
| <b>Sum</b> |      |             | <b>150.78</b> |        |       |      |

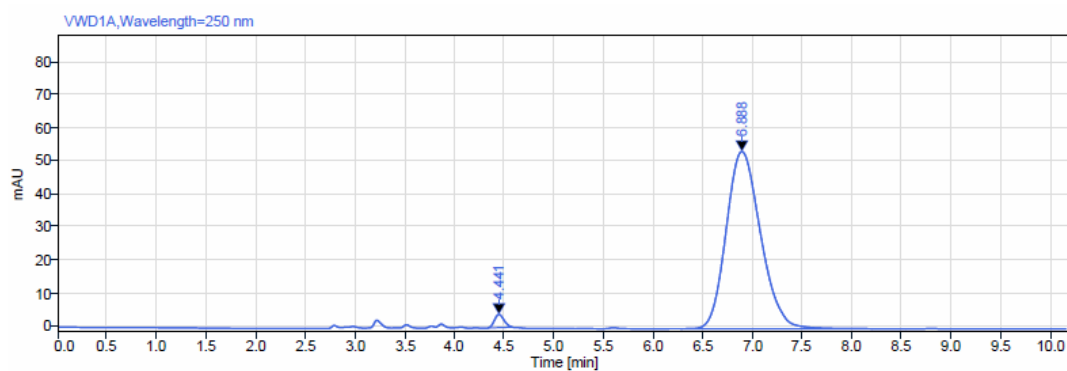

Signal: VWD1A,Wavelength=250 nm

| RT [min]   | Type | Width [min] | Area           | Height | Area% | Name |
|------------|------|-------------|----------------|--------|-------|------|
| 4.441      | MM m | 0.25        | 26.54          | 4.00   | 2.02  |      |
| 6.888      | MM m | 1.96        | 1289.28        | 53.62  | 97.98 |      |
| <b>Sum</b> |      |             | <b>1315.82</b> |        |       |      |

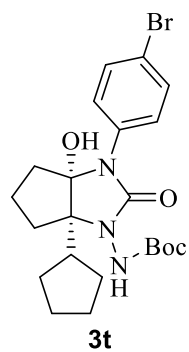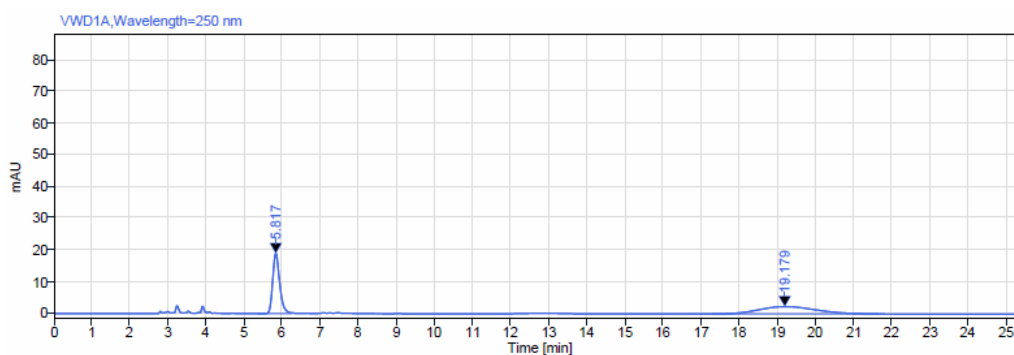

Signal: VWD1A,Wavelength=250 nm

| RT [min] | Type | Width [min] | Area          | Height | Area% | Name |
|----------|------|-------------|---------------|--------|-------|------|
| 5.817    | MM m | 1.31        | 241.95        | 18.95  | 49.96 |      |
| 19.179   | BM m | 4.36        | 242.33        | 2.32   | 50.04 |      |
|          |      | <b>Sum</b>  | <b>484.28</b> |        |       |      |

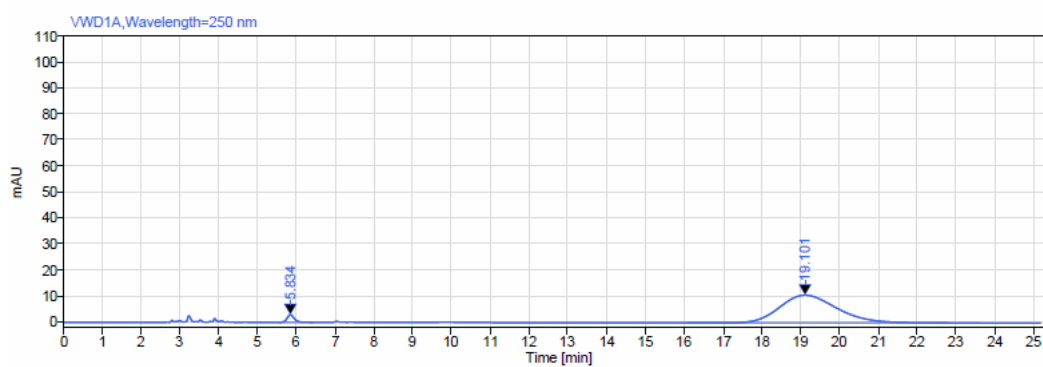

Signal: VWD1A,Wavelength=250 nm

| RT [min] | Type | Width [min] | Area           | Height | Area% | Name |
|----------|------|-------------|----------------|--------|-------|------|
| 5.834    | MM m | 0.89        | 37.76          | 2.94   | 3.34  |      |
| 19.101   | MM m | 7.58        | 1094.45        | 10.66  | 96.66 |      |
|          |      | <b>Sum</b>  | <b>1132.21</b> |        |       |      |

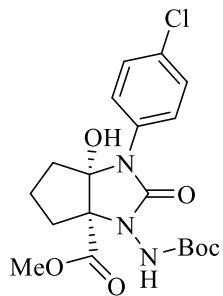

**3u**

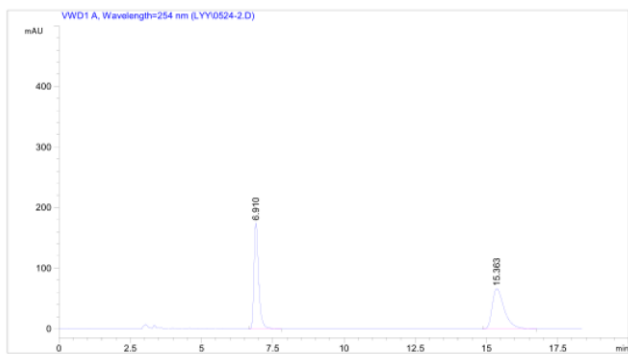

Area Percent Report

Sorted By : Signal  
Multiplier : 1.0000  
Dilution : 1.0000  
Use Multiplier & Dilution Factor with ISTDs

Signal 1: VWD1 A, Wavelength=254 nm

| Peak # | RetTime [min] | Type | Width [min] | Area mAU   | Area %  | Height [mAU] | Area %  |
|--------|---------------|------|-------------|------------|---------|--------------|---------|
| 1      | 6.910         | BB   | 0.1685      | 1961.17517 | 50.0061 | 175.15331    | 50.0061 |
| 2      | 15.363        | BB   | 0.4429      | 1960.69702 | 49.9939 | 66.80410     | 49.9939 |

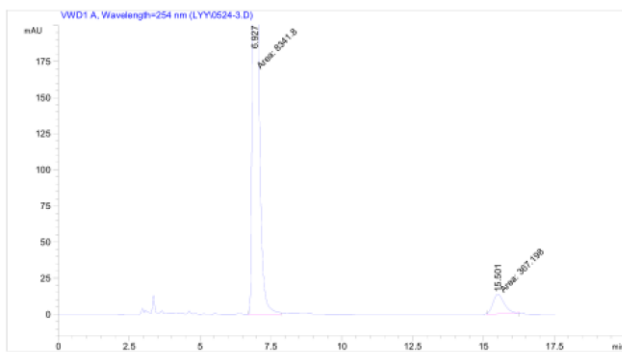

Area Percent Report

Sorted By : Signal  
Multiplier : 1.0000  
Dilution : 1.0000  
Use Multiplier & Dilution Factor with ISTDs

Signal 1: VWD1 A, Wavelength=254 nm

| Peak # | RetTime [min] | Type | Width [min] | Area mAU   | Area %  | Height [mAU] | Area %  |
|--------|---------------|------|-------------|------------|---------|--------------|---------|
| 1      | 6.927         | MM   | 0.1885      | 8341.80273 | 95.7837 | 737.46411    | 95.7837 |
| 2      | 15.501        | MM   | 0.4519      | 367.19839  | 4.2163  | 13.54283     | 4.2163  |



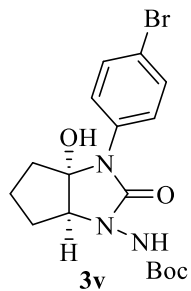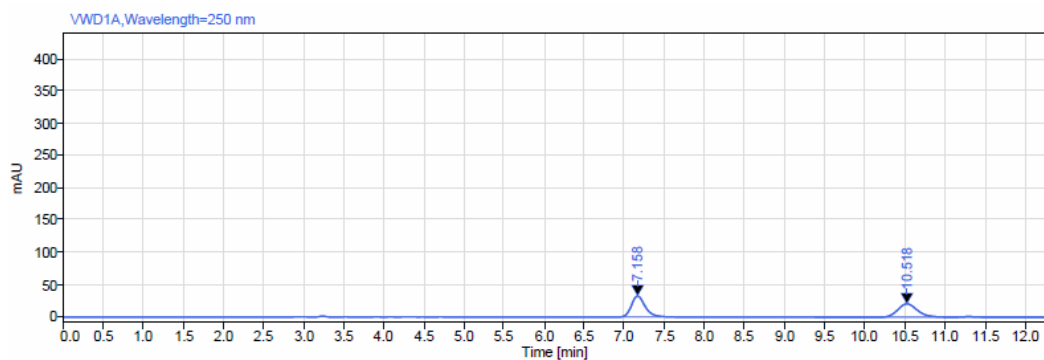

Signal: VWD1A,Wavelength=250 nm

| RT [min] | Type | Width [min] | Area          | Height | Area% | Name |
|----------|------|-------------|---------------|--------|-------|------|
| 7.158    | MM m | 0.67        | 387.68        | 32.60  | 50.69 |      |
| 10.518   | MM m | 3.65        | 377.09        | 20.75  | 49.31 |      |
|          |      | <b>Sum</b>  | <b>764.77</b> |        |       |      |

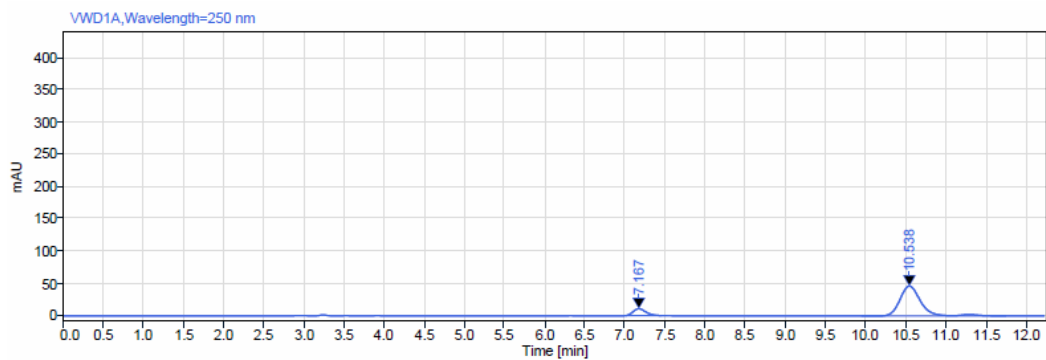

Signal: VWD1A,Wavelength=250 nm

| RT [min] | Type | Width [min] | Area          | Height | Area% | Name |
|----------|------|-------------|---------------|--------|-------|------|
| 7.167    | MM m | 0.45        | 118.41        | 10.72  | 12.30 |      |
| 10.538   | MM m | 1.80        | 843.95        | 46.39  | 87.70 |      |
|          |      | <b>Sum</b>  | <b>962.36</b> |        |       |      |

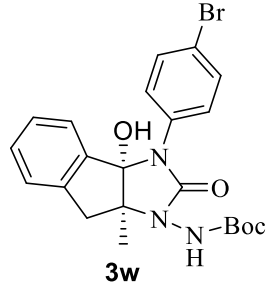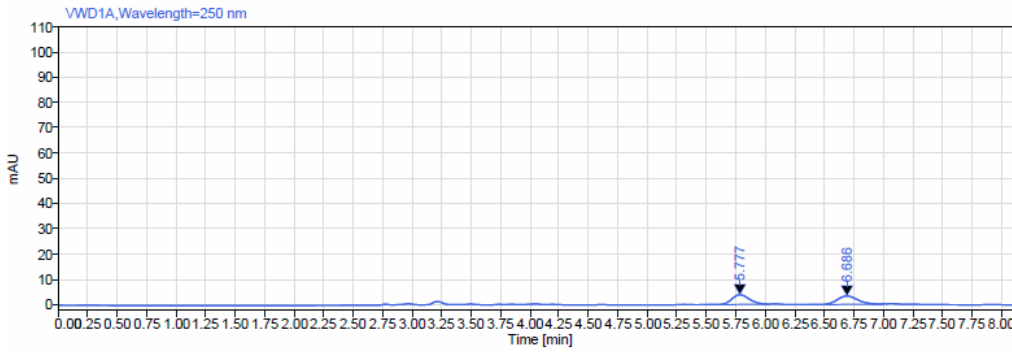

Signal: VWD1A,Wavelength=250 nm

| RT [min] | Type | Width [min] | Area         | Height | Area% | Name |
|----------|------|-------------|--------------|--------|-------|------|
| 5.777    | MM m | 0.51        | 39.08        | 3.84   | 49.94 |      |
| 6.686    | MM m | 0.63        | 39.18        | 3.31   | 50.06 |      |
|          |      | <b>Sum</b>  | <b>78.26</b> |        |       |      |

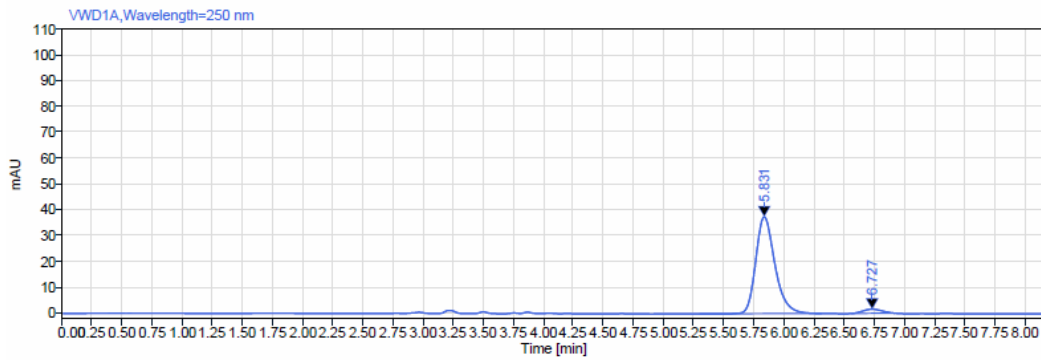

Signal: VWD1A,Wavelength=250 nm

| RT [min] | Type | Width [min] | Area          | Height | Area% | Name |
|----------|------|-------------|---------------|--------|-------|------|
| 5.831    | MM m | 1.01        | 413.90        | 37.51  | 95.91 |      |
| 6.727    | MM m | 0.36        | 17.65         | 1.61   | 4.09  |      |
|          |      | <b>Sum</b>  | <b>431.55</b> |        |       |      |

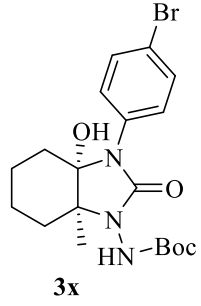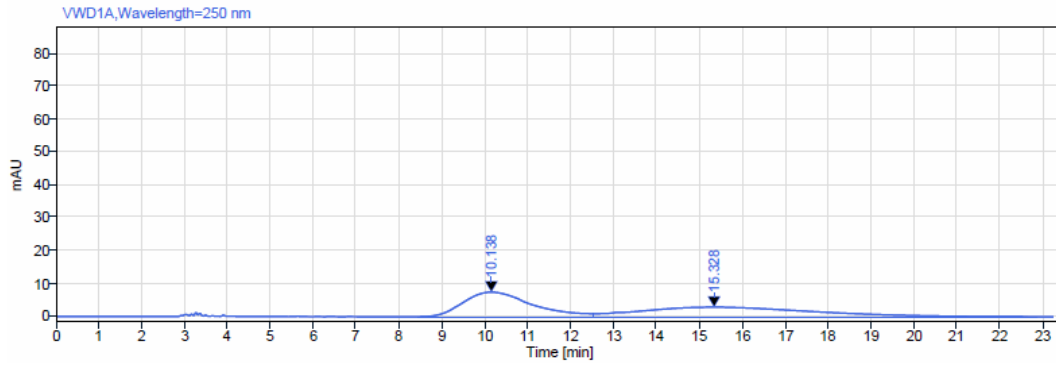

Signal: VWD1A,Wavelength=250 nm

| RT [min]   | Type | Width [min] | Area           | Height | Area% | Name |
|------------|------|-------------|----------------|--------|-------|------|
| 10.138     | MM m | 4.07        | 826.54         | 7.48   | 50.55 |      |
| 15.328     | MM m | 10.35       | 808.50         | 2.90   | 49.45 |      |
| <b>Sum</b> |      |             | <b>1635.04</b> |        |       |      |

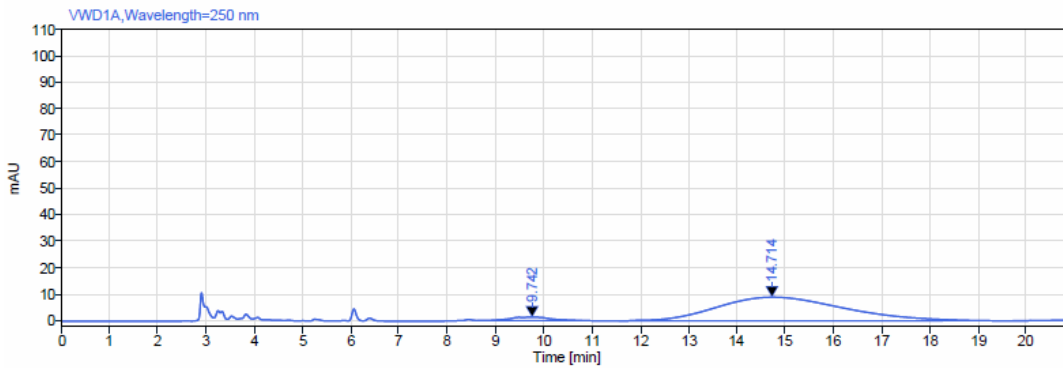

Signal: VWD1A,Wavelength=250 nm

| RT [min]   | Type | Width [min] | Area           | Height | Area% | Name |
|------------|------|-------------|----------------|--------|-------|------|
| 9.742      | MM m | 2.17        | 71.22          | 1.23   | 4.22  |      |
| 14.714     | MM m | 8.54        | 1616.10        | 8.91   | 95.78 |      |
| <b>Sum</b> |      |             | <b>1687.33</b> |        |       |      |

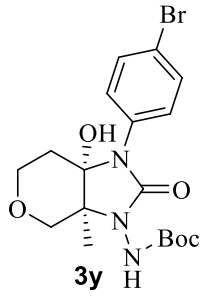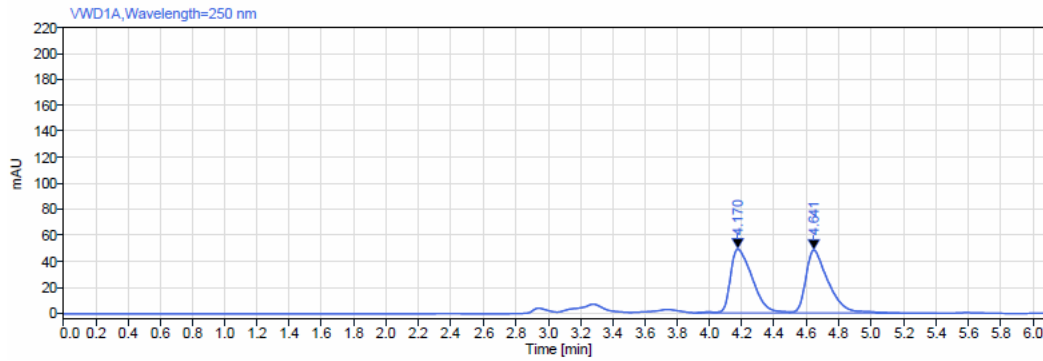

Signal: VWD1A,Wavelength=250 nm

| RT [min]   | Type | Width [min] | Area          | Height | Area% | Name |
|------------|------|-------------|---------------|--------|-------|------|
| 4.170      | MM m | 0.58        | 459.76        | 48.99  | 49.77 |      |
| 4.641      | MM m | 0.91        | 463.95        | 48.30  | 50.23 |      |
| <b>Sum</b> |      |             | <b>923.71</b> |        |       |      |

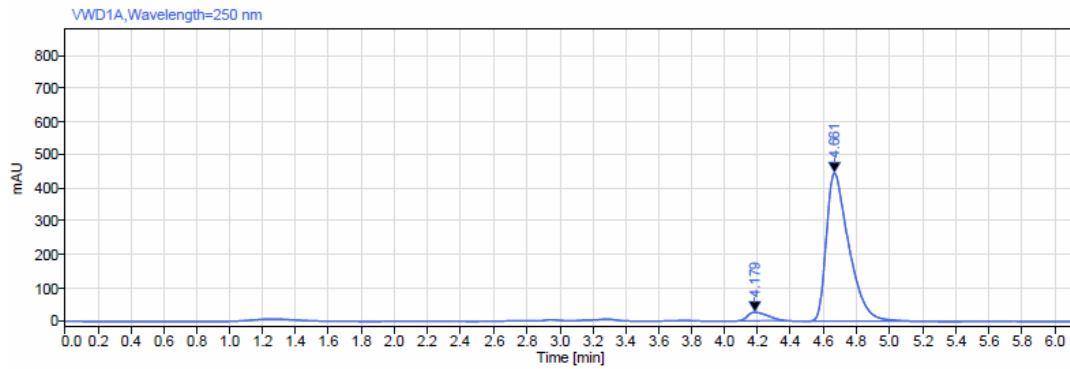

Signal: VWD1A,Wavelength=250 nm

| RT [min]   | Type | Width [min] | Area           | Height | Area% | Name |
|------------|------|-------------|----------------|--------|-------|------|
| 4.179      | MM m | 0.28        | 212.20         | 25.84  | 4.78  |      |
| 4.661      | MM m | 1.27        | 4223.58        | 445.91 | 95.22 |      |
| <b>Sum</b> |      |             | <b>4435.78</b> |        |       |      |

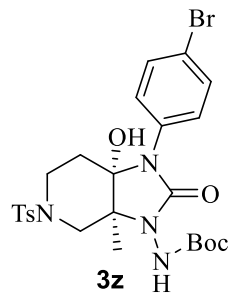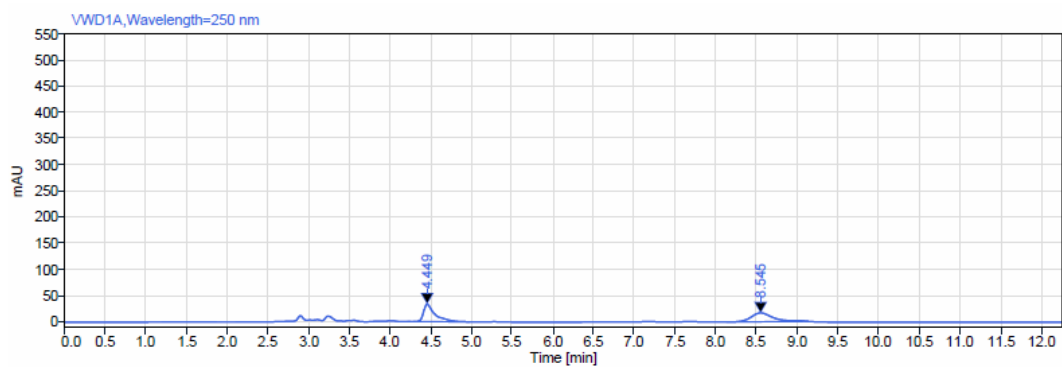

Signal: VWD1A,Wavelength=250 nm

| RT [min]   | Type | Width [min] | Area          | Height | Area% | Name |
|------------|------|-------------|---------------|--------|-------|------|
| 4.449      | MM m | 0.77        | 326.40        | 33.71  | 50.24 |      |
| 8.545      | MM m | 1.00        | 323.34        | 16.96  | 49.76 |      |
| <b>Sum</b> |      |             | <b>649.74</b> |        |       |      |

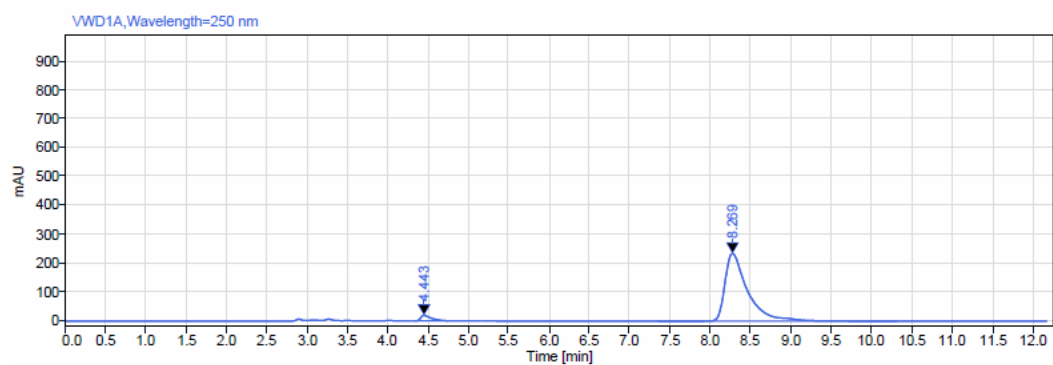

Signal: VWD1A,Wavelength=250 nm

| RT [min]   | Type | Width [min] | Area           | Height | Area% | Name |
|------------|------|-------------|----------------|--------|-------|------|
| 4.443      | MM m | 0.41        | 173.19         | 19.58  | 3.65  |      |
| 8.269      | MM m | 2.96        | 4572.30        | 234.58 | 96.35 |      |
| <b>Sum</b> |      |             | <b>4745.49</b> |        |       |      |

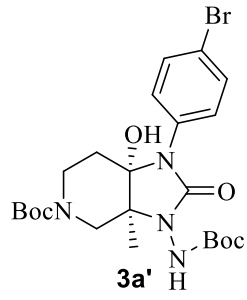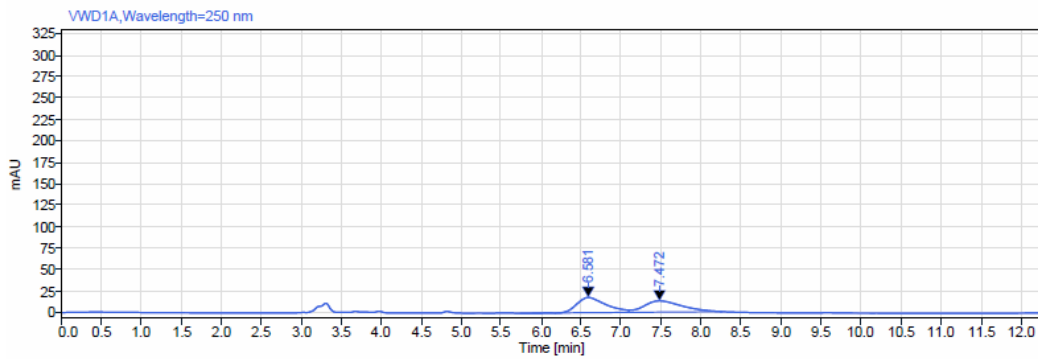

Signal: VWD1A, Wavelength=250 nm

| RT [min] | Type | Width [min] | Area   | Height | Area% | Name |
|----------|------|-------------|--------|--------|-------|------|
| 6.581    | MM m | 1.36        | 444.67 | 17.83  | 50.60 |      |
| 7.472    | MM m | 1.17        | 434.18 | 13.11  | 49.40 |      |
| Sum      |      |             | 878.84 |        |       |      |

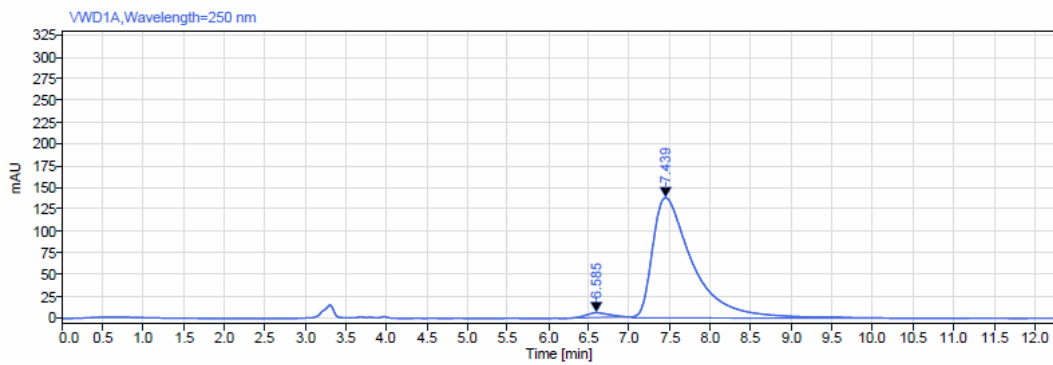

Signal: VWD1A, Wavelength=250 nm

| RT [min] | Type | Width [min] | Area    | Height | Area% | Name |
|----------|------|-------------|---------|--------|-------|------|
| 6.585    | MM m | 0.68        | 103.43  | 5.53   | 2.11  |      |
| 7.439    | MM m | 4.16        | 4793.03 | 138.35 | 97.89 |      |
| Sum      |      |             | 4896.46 |        |       |      |

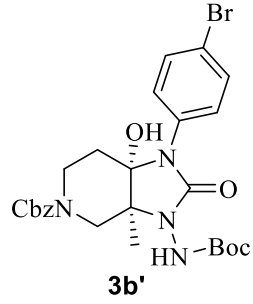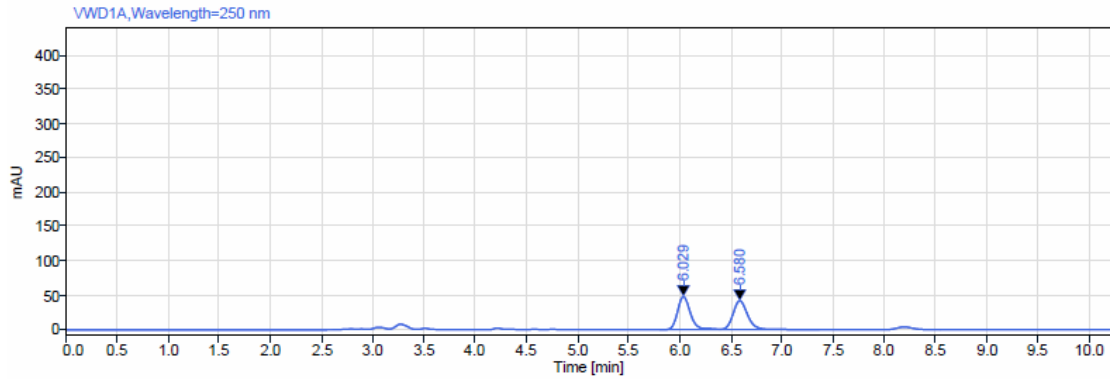

Signal: VWD1A, Wavelength=250 nm

| RT [min]   | Type | Width [min] | Area          | Height | Area% | Name |
|------------|------|-------------|---------------|--------|-------|------|
| 6.029      | MM m | 0.59        | 414.53        | 47.95  | 50.04 |      |
| 6.580      | MM m | 0.97        | 413.83        | 41.89  | 49.96 |      |
| <b>Sum</b> |      |             | <b>828.36</b> |        |       |      |

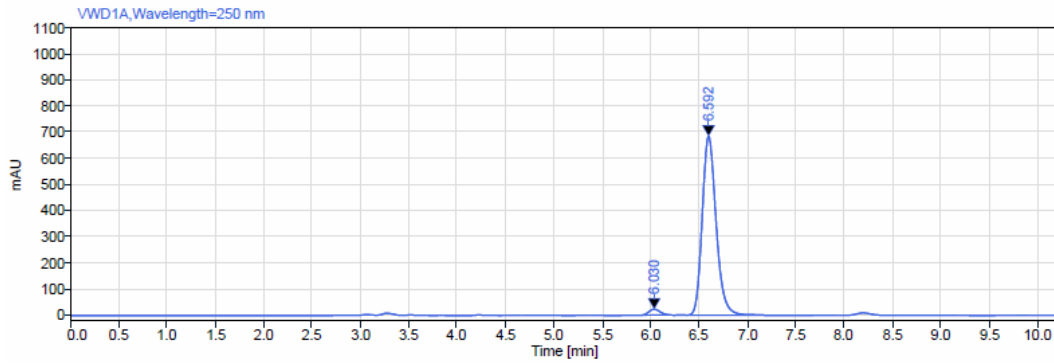

Signal: VWD1A, Wavelength=250 nm

| RT [min]   | Type | Width [min] | Area           | Height | Area% | Name |
|------------|------|-------------|----------------|--------|-------|------|
| 6.030      | MM m | 0.29        | 176.56         | 22.39  | 2.52  |      |
| 6.592      | MM m | 1.44        | 6838.50        | 684.38 | 97.48 |      |
| <b>Sum</b> |      |             | <b>7015.06</b> |        |       |      |

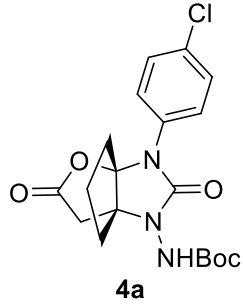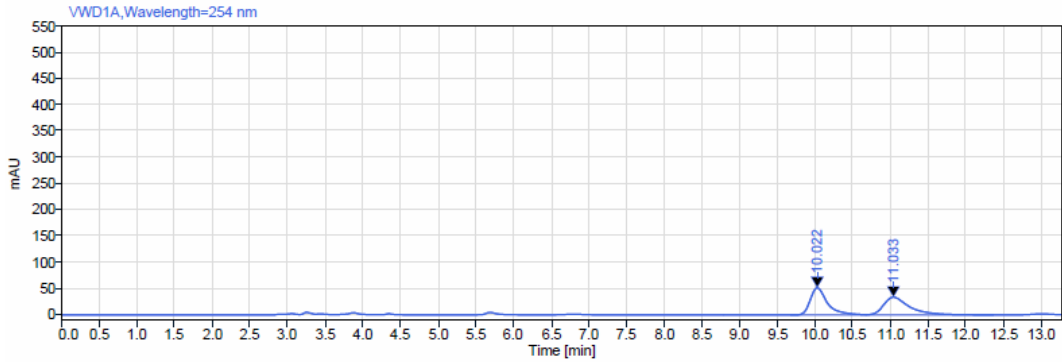

Signal: VWD1A,Wavelength=254 nm

| RT [min]   | Type | Width [min] | Area           | Height | Area% | Name |
|------------|------|-------------|----------------|--------|-------|------|
| 10.022     | BV   | 1.00        | 825.50         | 51.94  | 50.27 |      |
| 11.033     | VB   | 1.69        | 816.73         | 33.81  | 49.73 |      |
| <b>Sum</b> |      |             | <b>1642.23</b> |        |       |      |

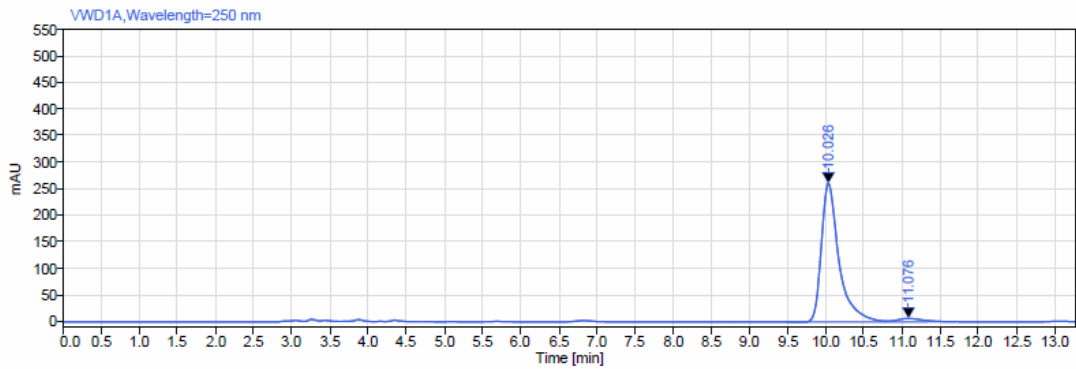

Signal: VWD1A,Wavelength=250 nm

| RT [min]   | Type | Width [min] | Area           | Height | Area% | Name |
|------------|------|-------------|----------------|--------|-------|------|
| 10.026     | MM m | 1.30        | 4188.05        | 260.59 | 96.46 |      |
| 11.076     | MM m | 0.92        | 153.53         | 6.43   | 3.54  |      |
| <b>Sum</b> |      |             | <b>4341.58</b> |        |       |      |



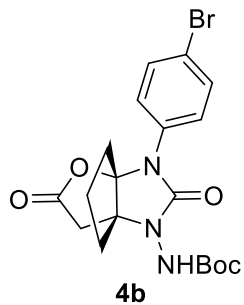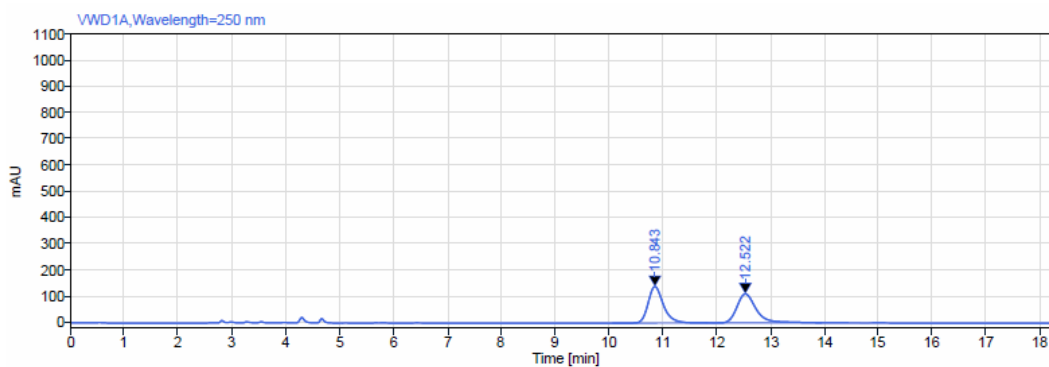

Signal: VWD1A,Wavelength=250 nm

| RT [min]   | Type | Width [min] | Area           | Height | Area% | Name |
|------------|------|-------------|----------------|--------|-------|------|
| 10.843     | MM m | 1.74        | 2733.25        | 138.92 | 49.74 |      |
| 12.522     | MM m | 2.15        | 2761.42        | 110.40 | 50.26 |      |
| <b>Sum</b> |      |             | <b>5494.67</b> |        |       |      |

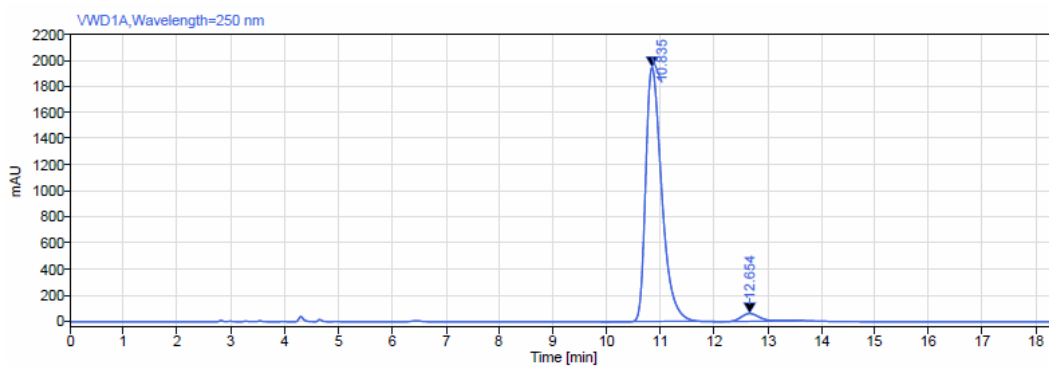

Signal: VWD1A,Wavelength=250 nm

| RT [min]   | Type | Width [min] | Area            | Height  | Area% | Name |
|------------|------|-------------|-----------------|---------|-------|------|
| 10.835     | MM m | 2.10        | 40150.59        | 1944.78 | 96.51 |      |
| 12.654     | MM m | 1.45        | 1451.79         | 59.50   | 3.49  |      |
| <b>Sum</b> |      |             | <b>41602.39</b> |         |       |      |

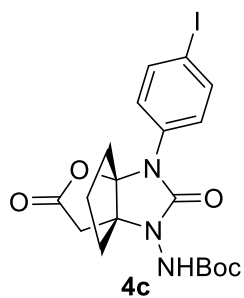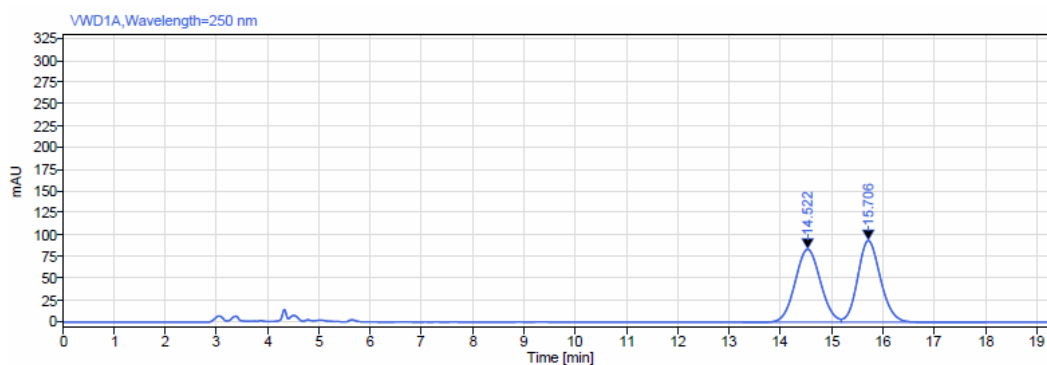

Signal: VWD1A,Wavelength=250 nm

| RT [min]   | Type | Width [min] | Area           | Height | Area% | Name |
|------------|------|-------------|----------------|--------|-------|------|
| 14.522     | MM m | 1.92        | 2869.93        | 83.76  | 49.82 |      |
| 15.706     | MM m | 2.82        | 2890.16        | 93.78  | 50.18 |      |
| <b>Sum</b> |      |             | <b>5760.10</b> |        |       |      |

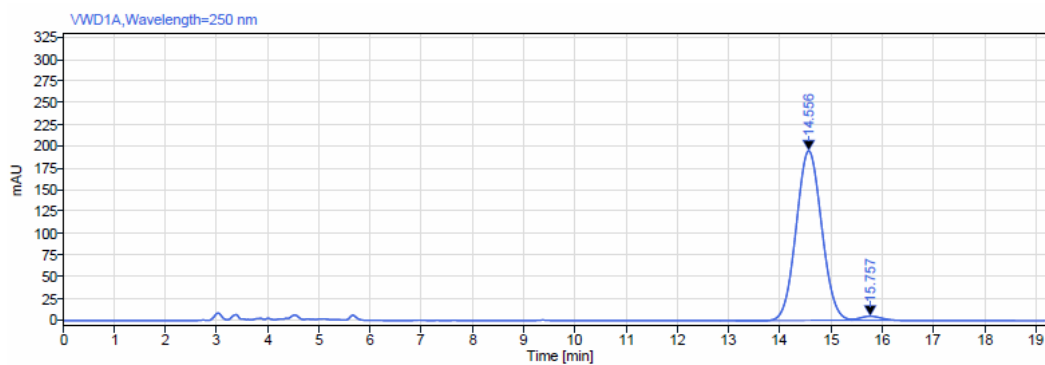

Signal: VWD1A,Wavelength=250 nm

| RT [min]   | Type | Width [min] | Area           | Height | Area% | Name |
|------------|------|-------------|----------------|--------|-------|------|
| 14.556     | MM m | 2.27        | 6742.03        | 195.10 | 98.13 |      |
| 15.757     | MM m | 0.83        | 128.49         | 4.63   | 1.87  |      |
| <b>Sum</b> |      |             | <b>6870.52</b> |        |       |      |

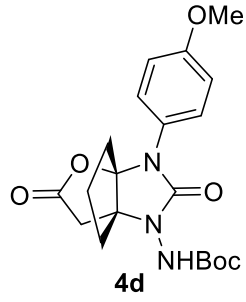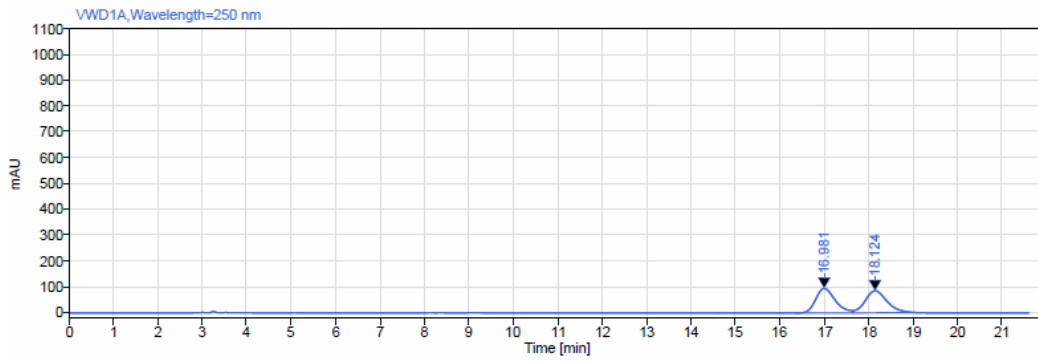

Signal: VWD1A,Wavelength=250 nm

| RT [min]   | Type | Width [min] | Area           | Height | Area% | Name |
|------------|------|-------------|----------------|--------|-------|------|
| 16.981     | MM m | 1.30        | 2885.21        | 95.06  | 49.51 |      |
| 18.124     | MM m | 1.53        | 2942.80        | 85.36  | 50.49 |      |
| <b>Sum</b> |      |             | <b>5828.00</b> |        |       |      |

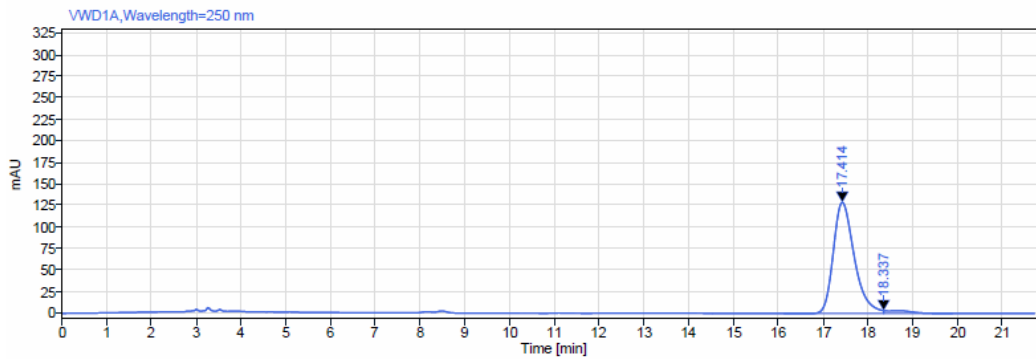

Signal: VWD1A,Wavelength=250 nm

| RT [min]   | Type | Width [min] | Area           | Height | Area% | Name |
|------------|------|-------------|----------------|--------|-------|------|
| 17.414     | MM m | 2.22        | 4203.36        | 129.12 | 96.92 |      |
| 18.337     | MM m | 1.54        | 133.65         | 3.34   | 3.08  |      |
| <b>Sum</b> |      |             | <b>4337.00</b> |        |       |      |

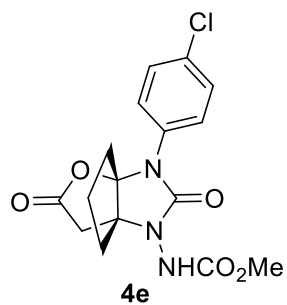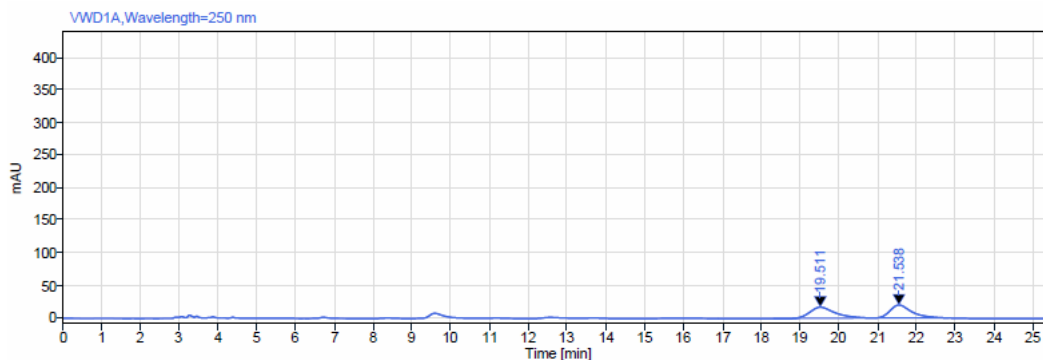

Signal: VWD1A,Wavelength=250 nm

| RT [min]   | Type | Width [min] | Area           | Height | Area% | Name |
|------------|------|-------------|----------------|--------|-------|------|
| 19.511     | MM m | 2.63        | 770.94         | 17.05  | 49.81 |      |
| 21.538     | MM m | 1.89        | 776.75         | 19.90  | 50.19 |      |
| <b>Sum</b> |      |             | <b>1547.69</b> |        |       |      |

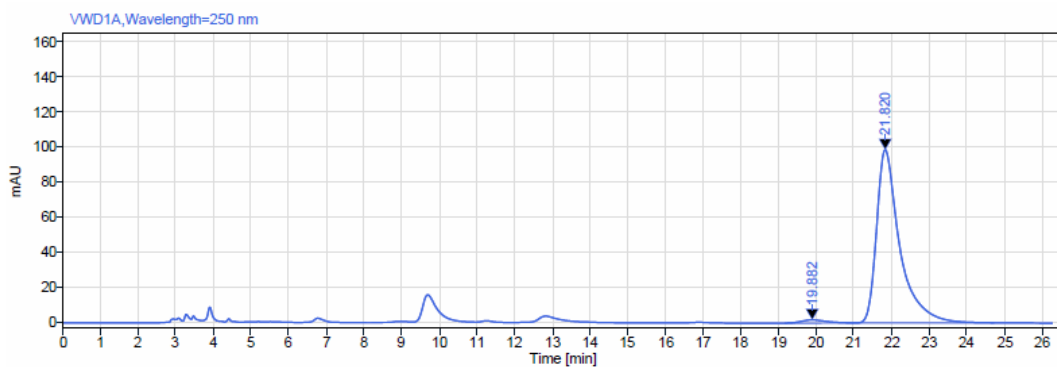

Signal: VWD1A,Wavelength=250 nm

| RT [min]   | Type | Width [min] | Area           | Height | Area% | Name |
|------------|------|-------------|----------------|--------|-------|------|
| 19.882     | MM m | 1.80        | 84.87          | 1.83   | 1.97  |      |
| 21.820     | MM m | 3.76        | 4217.26        | 98.77  | 98.03 |      |
| <b>Sum</b> |      |             | <b>4302.13</b> |        |       |      |

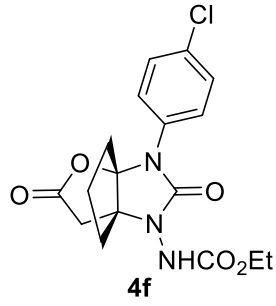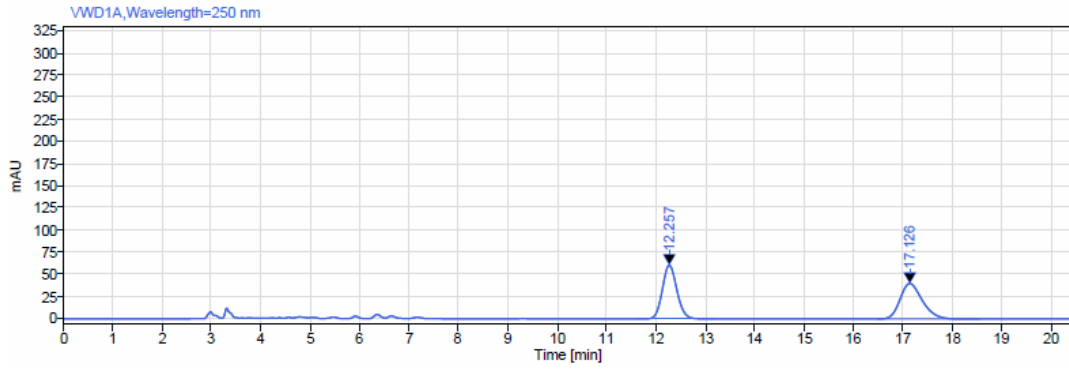

Signal: VWD1A,Wavelength=250 nm

| RT [min]   | Type | Width [min] | Area           | Height | Area% | Name |
|------------|------|-------------|----------------|--------|-------|------|
| 12.257     | MM m | 1.58        | 1236.29        | 60.74  | 49.84 |      |
| 17.126     | MM m | 2.07        | 1244.07        | 40.04  | 50.16 |      |
| <b>Sum</b> |      |             | <b>2480.36</b> |        |       |      |

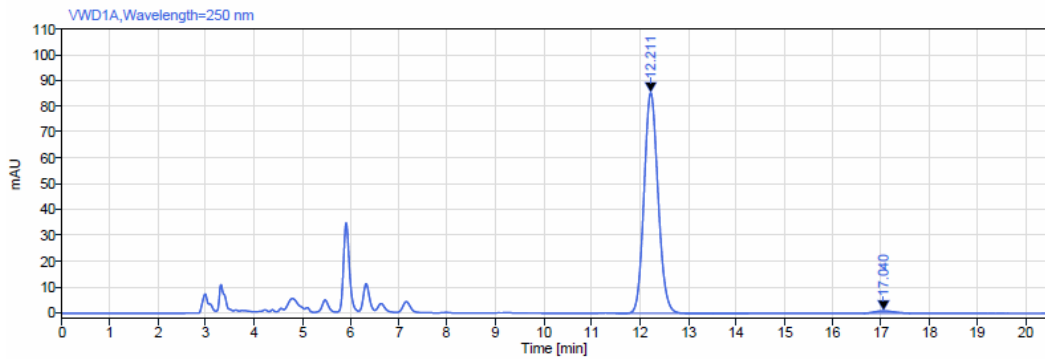

Signal: VWD1A,Wavelength=250 nm

| RT [min]   | Type | Width [min] | Area           | Height | Area% | Name |
|------------|------|-------------|----------------|--------|-------|------|
| 12.211     | MM m | 3.11        | 1721.35        | 85.35  | 98.53 |      |
| 17.040     | MM m | 0.97        | 25.69          | 0.91   | 1.47  |      |
| <b>Sum</b> |      |             | <b>1747.04</b> |        |       |      |

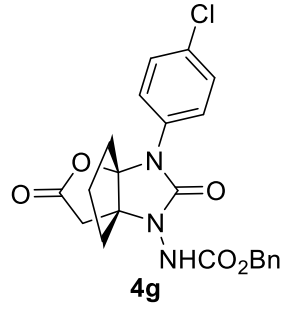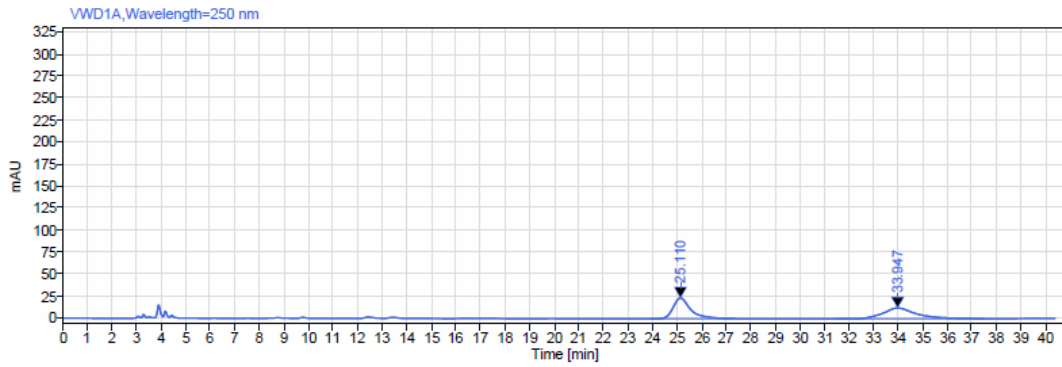

Signal: VWD1A, Wavelength=250 nm

| RT [min]   | Type | Width [min] | Area           | Height | Area% | Name |
|------------|------|-------------|----------------|--------|-------|------|
| 25.110     | MM m | 3.48        | 1154.98        | 23.54  | 50.34 |      |
| 33.947     | MM m | 6.03        | 1139.38        | 12.21  | 49.66 |      |
| <b>Sum</b> |      |             | <b>2294.36</b> |        |       |      |

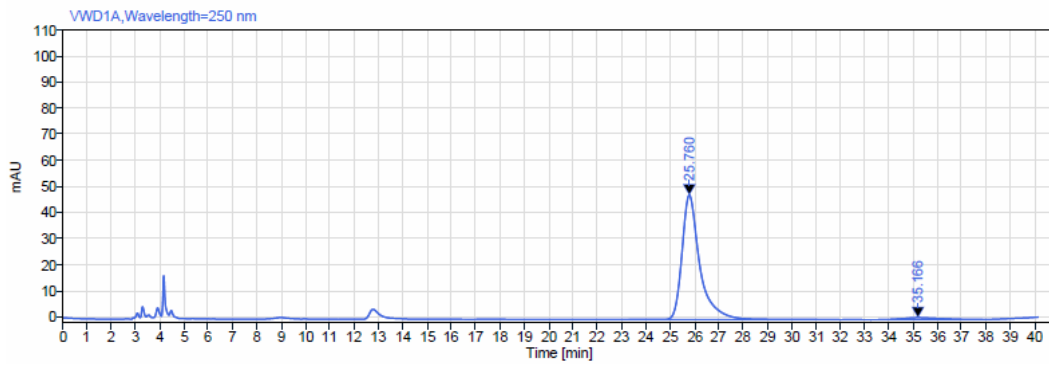

Signal: VWD1A, Wavelength=250 nm

| RT [min]   | Type | Width [min] | Area           | Height | Area% | Name |
|------------|------|-------------|----------------|--------|-------|------|
| 25.760     | MM m | 7.75        | 2421.64        | 47.65  | 96.82 |      |
| 35.166     | MM m | 4.41        | 79.65          | 0.77   | 3.18  |      |
| <b>Sum</b> |      |             | <b>2501.29</b> |        |       |      |

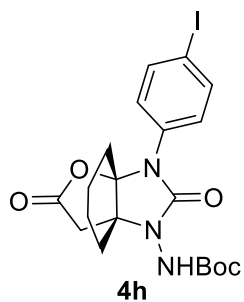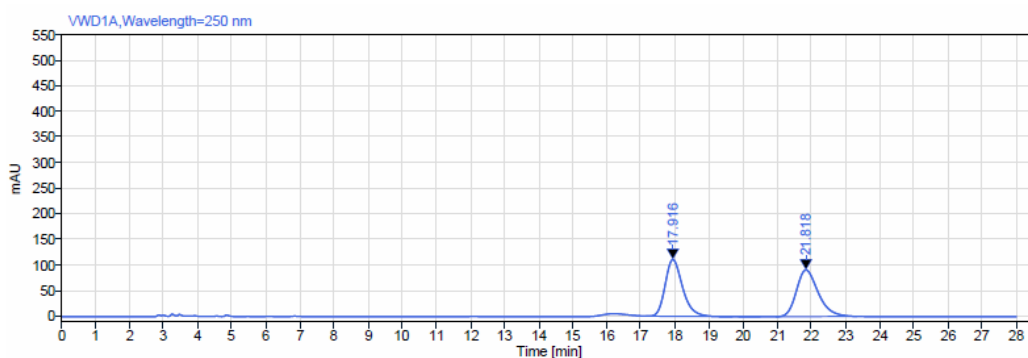

Signal: VWD1A,Wavelength=250 nm

| RT [min]   | Type | Width [min] | Area           | Height | Area% | Name |
|------------|------|-------------|----------------|--------|-------|------|
| 17.916     | MM m | 3.35        | 3921.34        | 110.79 | 49.30 |      |
| 21.818     | MM m | 2.38        | 4032.16        | 91.00  | 50.70 |      |
| <b>Sum</b> |      |             | <b>7953.51</b> |        |       |      |

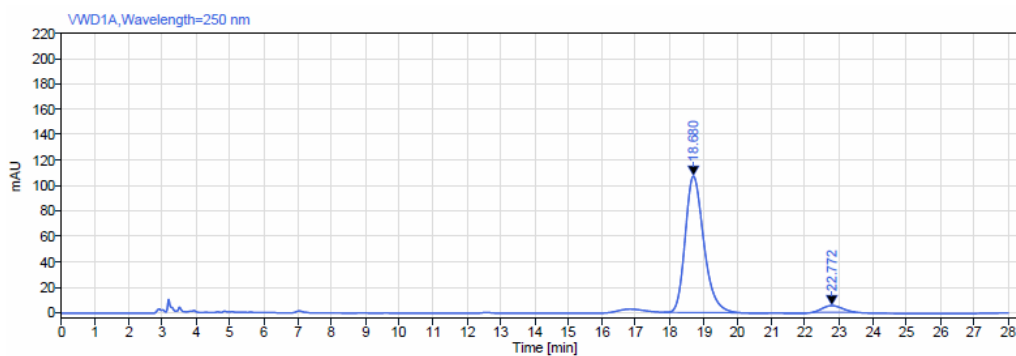

Signal: VWD1A,Wavelength=250 nm

| RT [min]   | Type | Width [min] | Area           | Height | Area% | Name |
|------------|------|-------------|----------------|--------|-------|------|
| 18.680     | MM m | 4.18        | 4089.32        | 107.23 | 95.26 |      |
| 22.772     | MM m | 1.26        | 203.68         | 5.16   | 4.74  |      |
| <b>Sum</b> |      |             | <b>4293.00</b> |        |       |      |

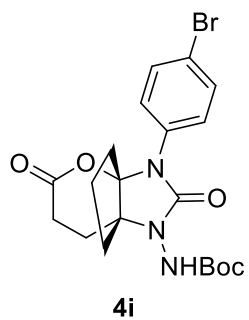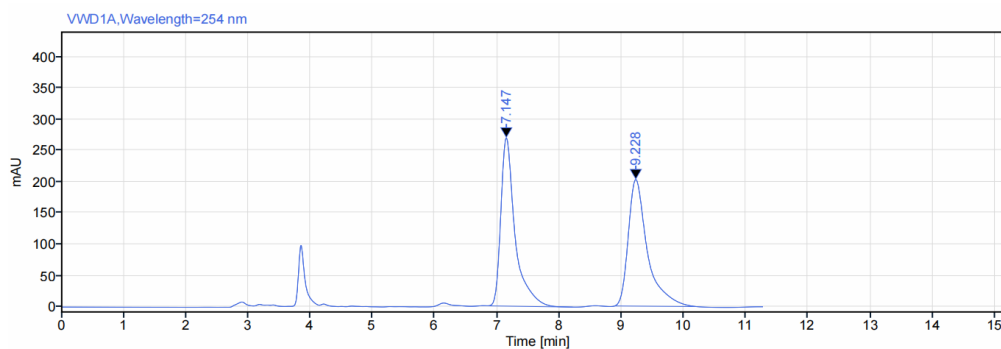

Signal: VWD1A,Wavelength=254 nm

| RT [min]   | Type | Width [min] | Area           | Height | Area% | Name |
|------------|------|-------------|----------------|--------|-------|------|
| 7.147      | MM m | 1.46        | 4283.27        | 269.30 | 49.76 |      |
| 9.228      | MM m | 1.31        | 4325.40        | 202.62 | 50.24 |      |
| <b>Sum</b> |      |             | <b>8608.67</b> |        |       |      |

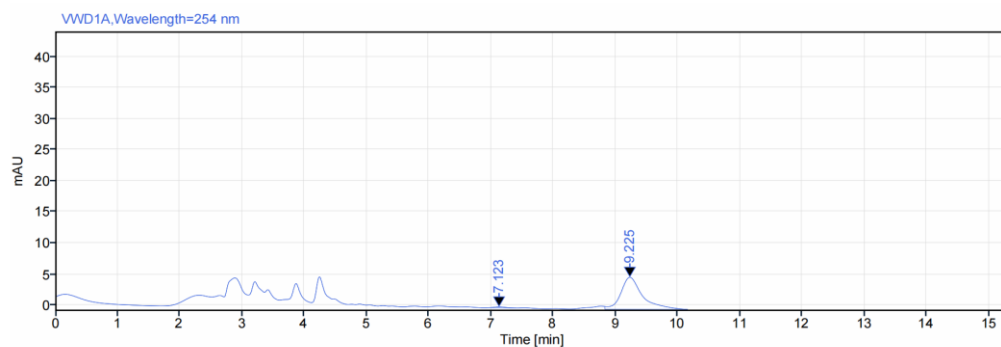

Signal: VWD1A,Wavelength=254 nm

| RT [min]   | Type | Width [min] | Area          | Height | Area% | Name |
|------------|------|-------------|---------------|--------|-------|------|
| 7.123      | MM m | 0.57        | 2.00          | 0.15   | 1.58  |      |
| 9.225      | MM m | 1.33        | 124.59        | 5.15   | 98.42 |      |
| <b>Sum</b> |      |             | <b>126.60</b> |        |       |      |



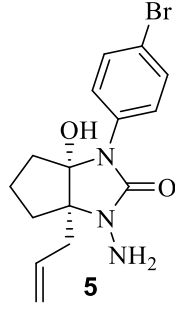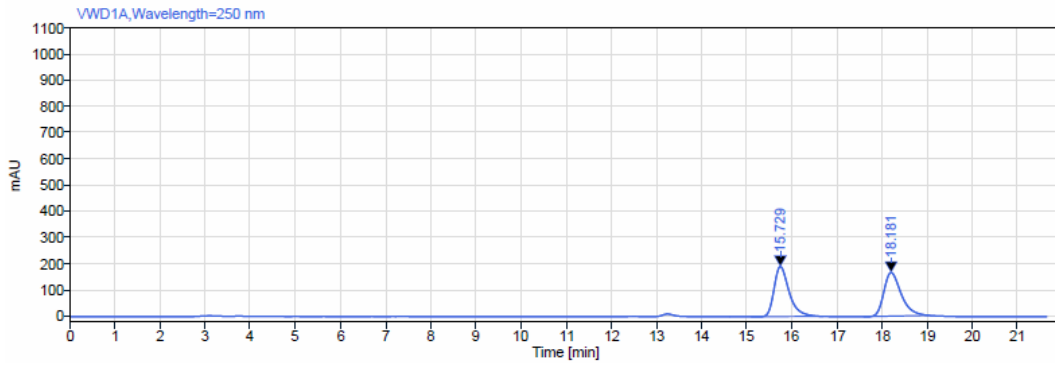

Signal: VWD1A,Wavelength=250 nm

| RT [min]   | Type | Width [min] | Area           | Height | Area% | Name |
|------------|------|-------------|----------------|--------|-------|------|
| 15.729     | MM m | 1.59        | 4420.64        | 190.74 | 50.09 |      |
| 18.181     | MM m | 1.44        | 4404.85        | 166.30 | 49.91 |      |
| <b>Sum</b> |      |             | <b>8825.50</b> |        |       |      |

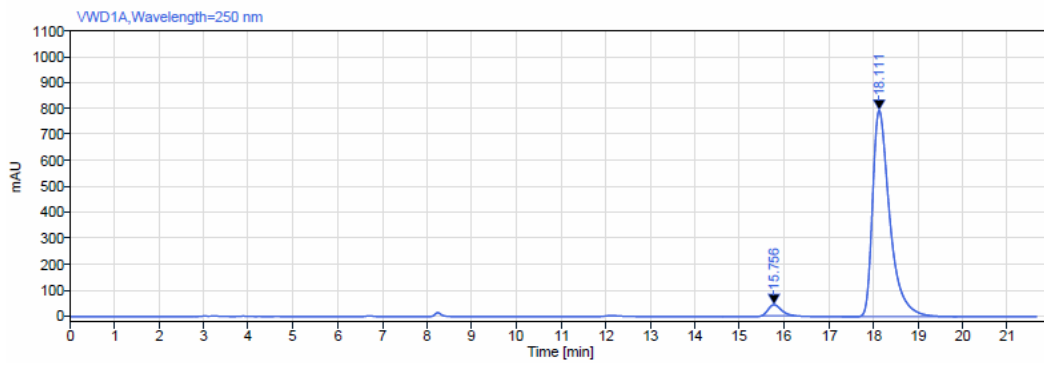

Signal: VWD1A,Wavelength=250 nm

| RT [min]   | Type | Width [min] | Area            | Height | Area% | Name |
|------------|------|-------------|-----------------|--------|-------|------|
| 15.756     | MM m | 0.74        | 843.25          | 42.28  | 3.83  |      |
| 18.111     | MM m | 2.58        | 21167.00        | 794.07 | 96.17 |      |
| <b>Sum</b> |      |             | <b>22010.25</b> |        |       |      |

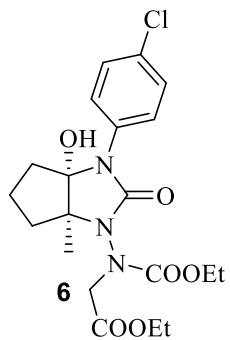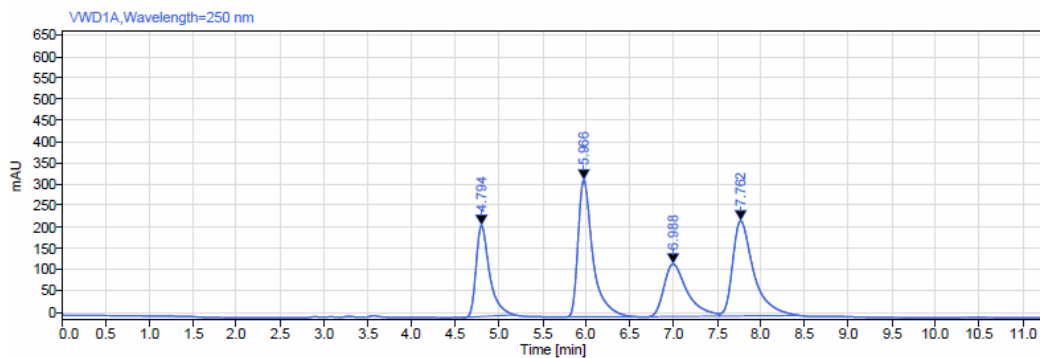

Signal: VWD1A,Wavelength=250 nm

| RT [min]   | Type | Width [min] | Area            | Height | Area% | Name |
|------------|------|-------------|-----------------|--------|-------|------|
| 4.794      | MM m | 0.61        | 2283.58         | 213.76 | 18.96 |      |
| 5.966      | MM m | 1.21        | 3747.56         | 321.06 | 31.12 |      |
| 6.988      | MM m | 0.96        | 2266.78         | 123.18 | 18.82 |      |
| 7.762      | MM m | 0.91        | 3744.49         | 223.29 | 31.09 |      |
| <b>Sum</b> |      |             | <b>12042.42</b> |        |       |      |

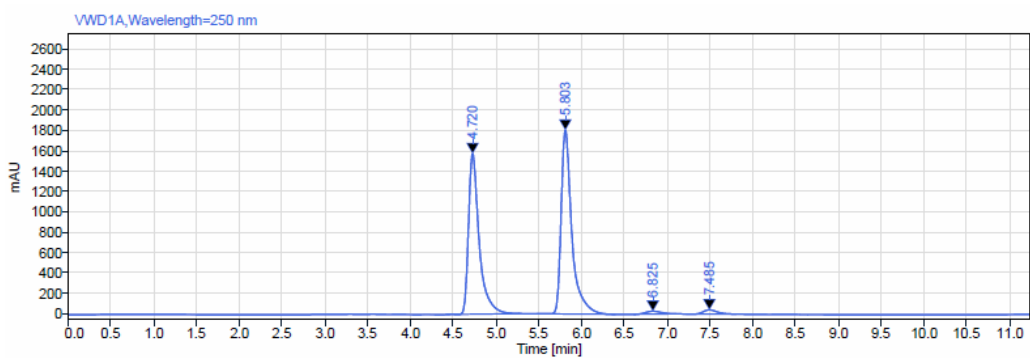

Signal: VWD1A,Wavelength=250 nm

| RT [min]   | Type | Width [min] | Area            | Height  | Area% | Name |
|------------|------|-------------|-----------------|---------|-------|------|
| 4.720      | MM m | 0.87        | 13657.14        | 1574.89 | 45.36 |      |
| 5.803      | MM m | 0.92        | 15630.04        | 1802.94 | 51.91 |      |
| 6.825      | MM m | 0.50        | 360.19          | 28.57   | 1.20  |      |
| 7.485      | MM m | 0.59        | 462.52          | 41.41   | 1.54  |      |
| <b>Sum</b> |      |             | <b>30109.88</b> |         |       |      |

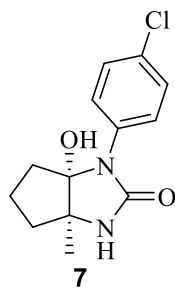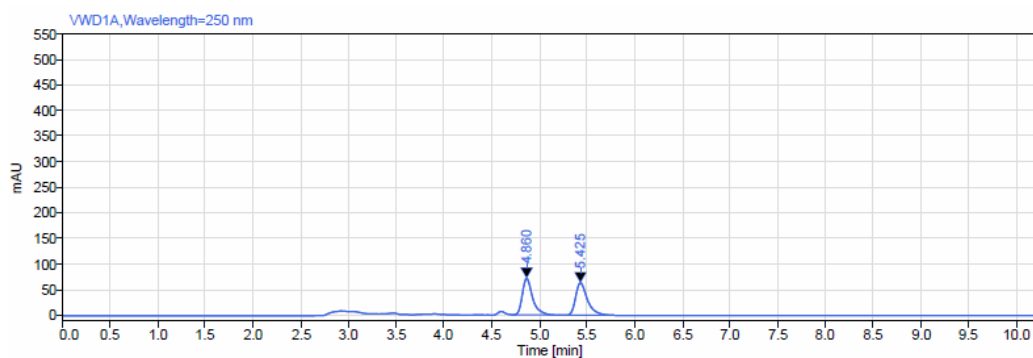

Signal: VWD1A,Wavelength=250 nm

| RT [min]   | Type | Width [min] | Area           | Height | Area% | Name |
|------------|------|-------------|----------------|--------|-------|------|
| 4.860      | MM m | 0.48        | 531.54         | 71.42  | 49.75 |      |
| 5.425      | MM m | 0.57        | 536.83         | 63.20  | 50.25 |      |
| <b>Sum</b> |      |             | <b>1068.37</b> |        |       |      |

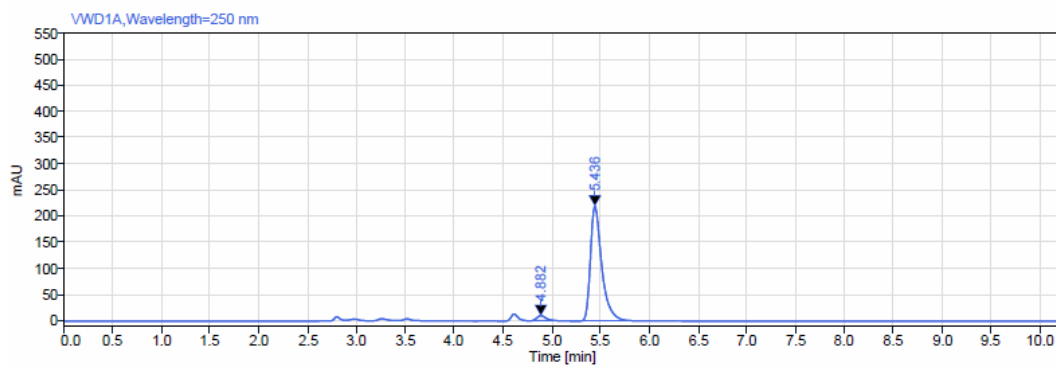

Signal: VWD1A,Wavelength=250 nm

| RT [min]   | Type | Width [min] | Area           | Height | Area% | Name |
|------------|------|-------------|----------------|--------|-------|------|
| 4.882      | MM m | 0.22        | 55.72          | 9.28   | 3.04  |      |
| 5.436      | MM m | 1.12        | 1779.54        | 219.59 | 96.96 |      |
| <b>Sum</b> |      |             | <b>1835.25</b> |        |       |      |

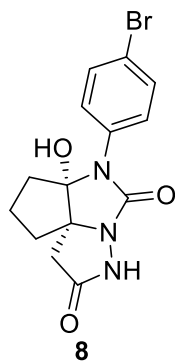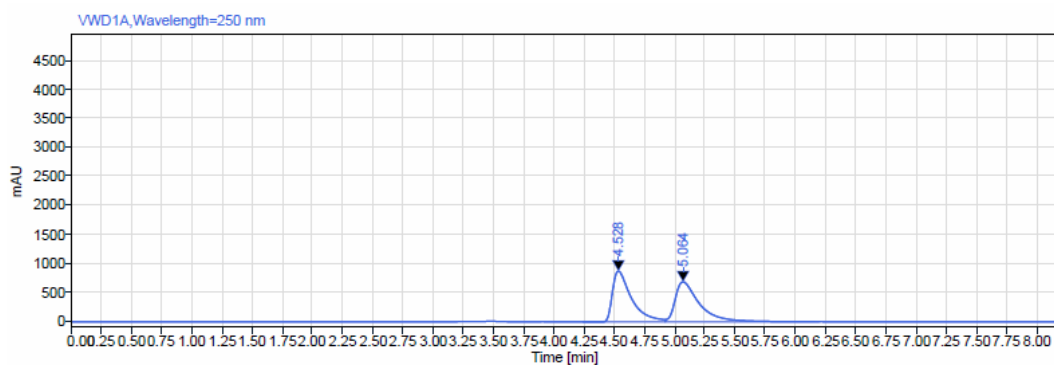

Signal: VWD1A,Wavelength=250 nm

| RT [min]   | Type | Width [min] | Area            | Height | Area% | Name |
|------------|------|-------------|-----------------|--------|-------|------|
| 4.528      | MM m | 0.69        | 9572.76         | 875.28 | 49.82 |      |
| 5.064      | MM m | 1.29        | 9641.50         | 690.09 | 50.18 |      |
| <b>Sum</b> |      |             | <b>19214.26</b> |        |       |      |

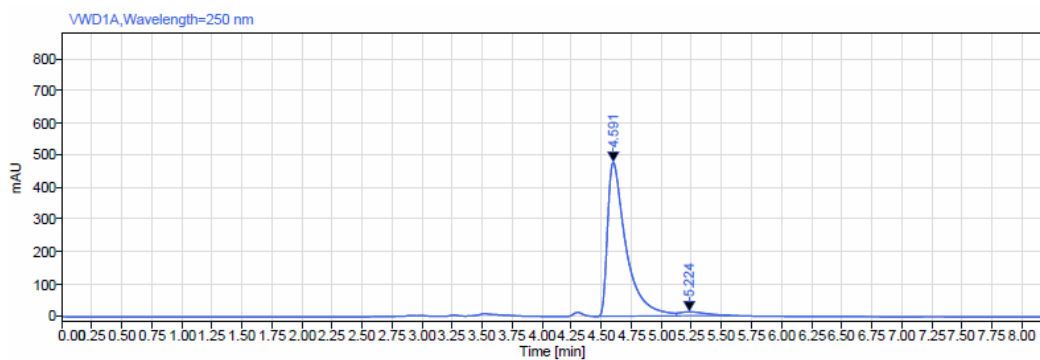

Signal: VWD1A,Wavelength=250 nm

| RT [min]   | Type | Width [min] | Area           | Height | Area% | Name |
|------------|------|-------------|----------------|--------|-------|------|
| 4.591      | MM m | 0.69        | 5120.39        | 478.33 | 96.58 |      |
| 5.224      | MM m | 0.45        | 181.45         | 12.18  | 3.42  |      |
| <b>Sum</b> |      |             | <b>5301.84</b> |        |       |      |

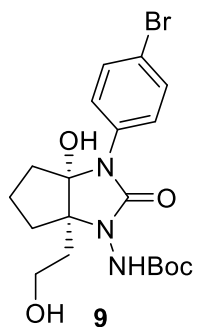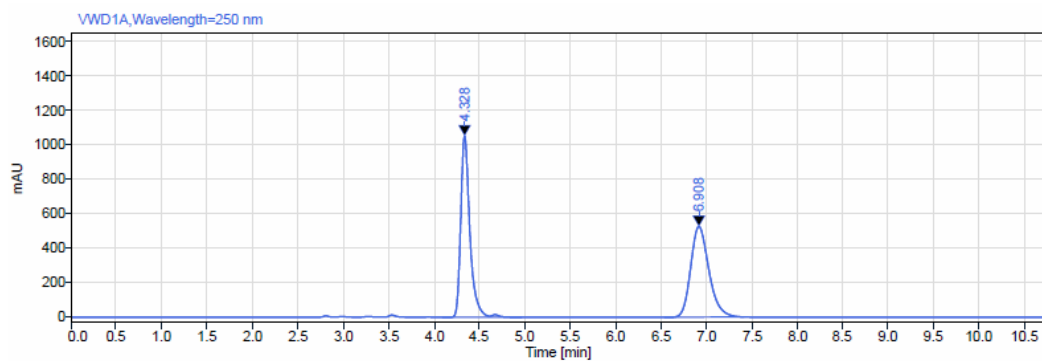

Signal: VWD1A,Wavelength=250 nm

| RT [min]   | Type | Width [min] | Area            | Height  | Area% | Name |
|------------|------|-------------|-----------------|---------|-------|------|
| 4.328      | MM m | 0.88        | 7369.33         | 1054.17 | 50.14 |      |
| 6.908      | MM m | 0.88        | 7329.42         | 527.20  | 49.86 |      |
| <b>Sum</b> |      |             | <b>14698.75</b> |         |       |      |

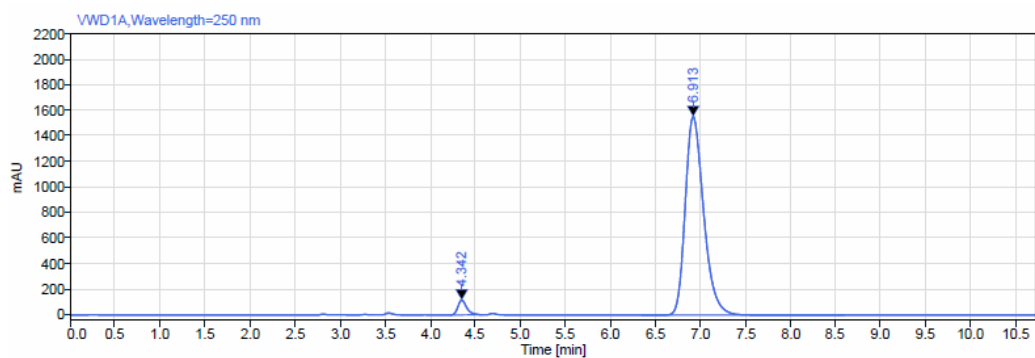

Signal: VWD1A,Wavelength=250 nm

| RT [min]   | Type | Width [min] | Area            | Height  | Area% | Name |
|------------|------|-------------|-----------------|---------|-------|------|
| 4.342      | MM m | 0.36        | 798.38          | 116.50  | 3.49  |      |
| 6.913      | MM m | 2.26        | 22057.49        | 1553.86 | 96.51 |      |
| <b>Sum</b> |      |             | <b>22855.87</b> |         |       |      |

## 7. References

- [1] Liu, B.; Li, K. N.; Luo, S. W.; Huang, J. Z.; Pang, K.; Gong, L. Z. *J. Am. Chem. Soc.* **2013**, 135, 3323–3326.
- [2] Rama, H.; Samir Z. Z. *Org. Biomol. Chem.*, **2011**, 9, 3396.
